# Supplementary material for: Towards routine organic structure determination using Raman microscopy
Source: Royal Society of Chemistry journal article supplement (doi:10.1039/d3sc02954a), 2023-11-14
Supplement: d3sc02954a1.pdf [file d3sc02954a1.pdf]

Supporting Information for:

# **Towards Routine Organic Structure Determination using Raman Microscopy**

Jason Malenfant, Lucille Kuster, Yohann Gagné, Kouassi Signo, Maxime Denis, Sylvain Canesi\*, Mathieu Frenette\*<sup>a</sup>

Department of Chemistry, NanoQAM and Centre Québécois de Matériaux Fonctionnels (CQMF), Université du Québec à Montréal, Montreal, Quebec H3C 3P8, Canada

\*frenette.mathieu@uqam.ca

## Table of Contents

|      |                                                                                                 |     |
|------|-------------------------------------------------------------------------------------------------|-----|
| 1.   | Simple computational protocol for modelling the Raman spectrum of organic solids as dimers..... | S3  |
| 2.   | Molecular modelling strategy comparison.....                                                    | S4  |
| 3.   | DFT Data.....                                                                                   | S5  |
| 3.1. | ORCA Input file example for pre-optimization.....                                               | S5  |
| 3.2. | ORCA Input file example for final frequency calculation.....                                    | S5  |
| 3.3. | Optimized atomic coordinates.....                                                               | S6  |
| 4.   | Raman spectra.....                                                                              | S56 |
| 5.   | Materials.....                                                                                  | S68 |
| 6.   | Synthesis of Borneol/Isoborneol.....                                                            | S68 |
| 7.   | Measurement parameters.....                                                                     | S69 |
| 8.   | SARA Compression function.....                                                                  | S69 |
| 9.   | References.....                                                                                 | S70 |

## 1. Simple computational protocol for modelling the Raman spectrum of organic solids as dimers

- 1- To model an organic molecule containing  $N_c$  carbons, we start by creating approximately  $\frac{N_c}{4} + 1$  conformers (depending on rigidity) of a single molecule (monomer) in Avogadro and export each set of cartesian atomic coordinates to a .xyz file.
- 2- Then, each monomer geometry is pre-optimized with ORCA at the r<sup>2</sup>SCAN-3c level of theory in gas phase. An example input file can be used from section 3.1. The optimized monomers are ranked by their final single point energies (SPE), and the two most stable conformers are selected.
- 3- For each of the two pre-optimized monomers, we create, again with Avogadro, at least 8 dimer geometries with various relative positioning by means of rigid transformations. When applicable, we prioritize the hydrogen bonds between molecules followed by  $\pi$ -stacking placements.
- 4- The dimers are optimized with ORCA at the r<sup>2</sup>SCAN-3c level of theory in gas phase, with the TightOpt command.
- 5- The optimized dimers are again ranked by SPE, and the single most favorable geometry is used to calculate the Raman spectrum at the same level of theory still, with an input file using the commands shown in the example in section 3.2. If an imaginary frequency is found (in an ORCA output file, typically above all the vibration information, near the SPE), a new conformer must be generated. When a spectrum without imaginary frequencies is obtained, the spectral information can be obtained from the output file.
- 6- To extract the spectral data, the tool orca\_mapspc is used with the following command:

```
orca_mapspc [OUTPUT FILE NAME] raman -cm -w04 -x00 -x14000 -n4000
```

And the generated .stk file is used for processing with the correlation software.

## 2. Molecular modelling strategy comparison

|        | 1-DFT     | 2-DFT     | 3-DFT     | 4-DFT     | 5-DFT     | 6-DFT     | 7-DFT     | 8-DFT     | 9-DFT     | 10-DFT    | 11-DFT    | 12-DFT    |
|--------|-----------|-----------|-----------|-----------|-----------|-----------|-----------|-----------|-----------|-----------|-----------|-----------|
| 1-Exp  | <b>94</b> | 49        | 27        | 41        | 56        | 69        | 43        | 33        | 50        | 44        | 55        | 65        |
| 2-Exp  | 40        | <b>79</b> | 34        | 23        | 53        | 56        | 43        | 22        | 34        | 24        | 31        | 66        |
| 3-Exp  | 13        | 16        | <b>83</b> | 16        | 48        | 20        | 18        | 20        | 14        | 6         | 13        | 29        |
| 4-Exp  | 47        | 25        | 32        | <b>66</b> | 44        | 24        | 34        | 31        | 44        | 47        | 40        | 38        |
| 5-Exp  | 36        | 32        | 50        | 38        | <b>62</b> | 40        | 28        | 35        | 33        | 29        | 34        | 43        |
| 6-Exp  | 53        | 58        | 48        | 28        | 59        | <b>75</b> | 31        | 20        | 28        | 41        | 38        | 61        |
| 7-Exp  | 52        | 52        | 21        | 38        | 49        | 56        | <b>59</b> | 46        | 63        | 51        | 65        | 66        |
| 8-Exp  | 30        | 25        | 13        | 44        | 30        | 21        | 26        | <b>54</b> | 56        | 40        | 34        | 25        |
| 9-Exp  | 30        | 24        | 40        | 22        | 42        | 34        | 18        | 41        | <b>80</b> | 37        | 38        | 39        |
| 10-Exp | 44        | 35        | 36        | 52        | 48        | 43        | 44        | 29        | 54        | <b>72</b> | 54        | 53        |
| 11-Exp | 49        | 27        | 27        | <b>68</b> | 48        | 46        | 52        | 55        | 66        | 68        | <b>73</b> | 48        |
| 12-Exp | 46        | 53        | 38        | 28        | 51        | 45        | 23        | 13        | 26        | 24        | 23        | <b>71</b> |

**Figure S1.** Match scores for the twelve initial compounds, calculated as single molecules (“monomers”), with  $r^2$ SCAN-3c in gas phase. When only one molecule is modelled, several false positives are obtained (in red). An average of 0.4 hours is required to generate the DFT spectra in the final frequency calculation on 16 cores. This figure is also shown in the main article as **Figure 5B**, but is reprinted here for ease of comparison.

|        | 1-DFT     | 2-DFT     | 3-DFT     | 4-DFT     | 5-DFT     | 6-DFT     | 7-DFT     | 8-DFT     | 9-DFT     | 10-DFT    | 11-DFT    | 12-DFT    |
|--------|-----------|-----------|-----------|-----------|-----------|-----------|-----------|-----------|-----------|-----------|-----------|-----------|
| 1-Exp  | <b>94</b> | 53        | 28        | 48        | 54        | 69        | 58        | 44        | 45        | 43        | 56        | 67        |
| 2-Exp  | 41        | <b>89</b> | 36        | 26        | 52        | 51        | 52        | 24        | 32        | 25        | 33        | 63        |
| 3-Exp  | 14        | 16        | <b>86</b> | 16        | 47        | 22        | 13        | 16        | 15        | 7         | 16        | 30        |
| 4-Exp  | 46        | 30        | 32        | <b>86</b> | 42        | 23        | 43        | 54        | 40        | 55        | 40        | 41        |
| 5-Exp  | 36        | 34        | 53        | 23        | <b>81</b> | 46        | 19        | 23        | 35        | 20        | 18        | 54        |
| 6-Exp  | 53        | 55        | 49        | 31        | 57        | <b>81</b> | 41        | 21        | 25        | 42        | 39        | 58        |
| 7-Exp  | 52        | 67        | 24        | 46        | 45        | 49        | <b>80</b> | 52        | 61        | 52        | 66        | 56        |
| 8-Exp  | 30        | 27        | 16        | 59        | 28        | 20        | 48        | <b>78</b> | 56        | 45        | 35        | 25        |
| 9-Exp  | 29        | 36        | 42        | 24        | 40        | 33        | 22        | 45        | <b>77</b> | 35        | 41        | 41        |
| 10-Exp | 43        | 43        | 37        | 61        | 43        | 45        | 41        | 37        | 52        | <b>75</b> | 53        | 50        |
| 11-Exp | 49        | 44        | 31        | 66        | 44        | 43        | 66        | 65        | 66        | 65        | <b>75</b> | 40        |
| 12-Exp | 46        | 51        | 38        | 32        | 52        | 47        | 29        | 22        | 25        | 26        | 23        | <b>75</b> |

**Figure S2.** Match scores for the twelve initial compounds, calculated as pairs of molecules (“dimers”), with  $r^2$ SCAN-3c in gas phase. A sizable improvement in spectral correlation can be observed. An average of 3.0 hours is required to generate the DFT spectra in the final frequency calculation on 16 cores. This figure is also shown in the main article as **Figure 5C**, but is reprinted here for ease of comparison.

|        | 1-DFT     | 2-DFT     | 3-DFT     | 4-DFT     | 5-DFT     | 6-DFT     | 7-DFT     | 8-DFT     | 9-DFT     | 10-DFT    | 11-DFT    | 12-DFT    |
|--------|-----------|-----------|-----------|-----------|-----------|-----------|-----------|-----------|-----------|-----------|-----------|-----------|
| 1-Exp  | <b>94</b> | 50        | 28        | 50        | 54        | 66        | 56        | 35        | 44        | 53        | 58        | 68        |
| 2-Exp  | 41        | <b>82</b> | 36        | 28        | 52        | 51        | 52        | 17        | 36        | 37        | 32        | 64        |
| 3-Exp  | 14        | 15        | <b>85</b> | 20        | 47        | 20        | 19        | 9         | 17        | 13        | 15        | 29        |
| 4-Exp  | 46        | 27        | 35        | <b>78</b> | 42        | 22        | 45        | 40        | 39        | 64        | 43        | 39        |
| 5-Exp  | 36        | 30        | 49        | 28        | <b>82</b> | 40        | 24        | 13        | 37        | 27        | 19        | 50        |
| 6-Exp  | 52        | 58        | 47        | 36        | 57        | <b>80</b> | 42        | 21        | 25        | 52        | 37        | 63        |
| 7-Exp  | 51        | 58        | 25        | 45        | 44        | 50        | <b>77</b> | 41        | 61        | 55        | 67        | 65        |
| 8-Exp  | 31        | 25        | 19        | 50        | 27        | 18        | 45        | <b>64</b> | 55        | 39        | 41        | 28        |
| 9-Exp  | 30        | 27        | 45        | 27        | 40        | 31        | 26        | 36        | <b>78</b> | 36        | 41        | 44        |
| 10-Exp | 43        | 38        | 39        | 63        | 43        | 41        | 51        | 40        | 51        | <b>81</b> | 54        | 58        |
| 11-Exp | 49        | 33        | 33        | 69        | 44        | 41        | 68        | 45        | 66        | 59        | <b>82</b> | 47        |
| 12-Exp | 45        | 52        | 37        | 35        | 53        | 42        | 29        | 16        | 29        | 36        | 23        | <b>73</b> |

**Figure S3.** Match scores for the twelve initial compounds, calculated as four molecules (“tetramers”), with  $r^2$ SCAN-3c in gas phase. Some correlation scores go down, which we hypothesize is because a complete conformational search for the position of 4 discrete molecules is harder to achieve, or the optimal conformer changes with the number of molecules modeled. An average of 14 hours is required to generate the DFT spectra in the final frequency calculation on 16 cores, which in the context of routine analysis we consider too high for molecules of this size.

### 3. DFT Data

#### 3.1. ORCA Input file example for pre-optimization

```
# [MOLECULE IDENTIFIER]
!Opt r2SCAN-3c

%pal
  nprocs 16 # Number of cores
end

%maxcore 3000 # Memory allocation per core

*xyz 0 1 # Charge and multiplicity
  [CARTESIAN ATOMIC COORDINATES HERE]
*
```

#### 3.2. ORCA Input file example for final frequency calculation

```
# [MOLECULE IDENTIFIER]
!Opt NumFreq r2SCAN-3c TIGHTOPT

%elprop
  polar 1 # Calculate Raman spectrum
end

%pal
  nprocs 16 # Number of cores
end

%maxcore 3000 # Memory allocation per core

*xyz 0 1 # Charge and multiplicity
  [DIMER CARTESIAN ATOMIC COORDINATES HERE]
*
```

### 3.3. Optimized atomic coordinates

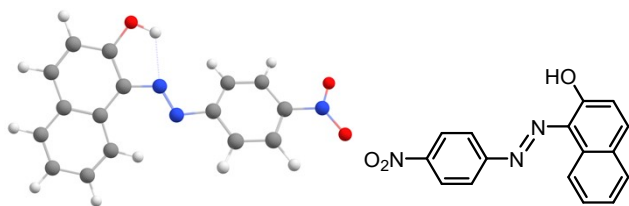

Main article molecule number: **PR1-enol**

Name: PR1 (Pigment Red #1), enol form

Qty of copies of the molecule modelled: 1

Qty of imaginary frequencies: 0

Final single point energy (Eh): -2011.9500779559

|   |                   |                   |                   |
|---|-------------------|-------------------|-------------------|
| C | 3.40710546377955  | -2.74019665988325 | 0.24975933141068  |
| C | 2.45373917678617  | -1.74591465514957 | 0.13989257303273  |
| C | 2.83418603508477  | -0.39118532590009 | 0.02363571147449  |
| C | 4.23376589228860  | -0.08872767828272 | 0.03204070036504  |
| C | 5.17860675403714  | -1.12934720557958 | 0.14266459455293  |
| C | 4.77659693244585  | -2.44115044586260 | 0.24842743001514  |
| H | 3.08341201184807  | -3.77332895814798 | 0.33874683495552  |
| H | 1.40480606901022  | -2.00251721127269 | 0.13913946826118  |
| C | 1.91074720880214  | 0.71214304734943  | -0.08636428655890 |
| C | 4.67229957495038  | 1.25912029986993  | -0.06648823389195 |
| H | 6.23517432639257  | -0.87339023597984 | 0.14526889617247  |
| H | 5.51077729768887  | -3.23637985545891 | 0.33322312919138  |
| C | 3.79355383883327  | 2.30033365547036  | -0.16516656127435 |
| C | 2.41274032129810  | 2.03215289282406  | -0.17665835252368 |
| H | 5.74193429919738  | 1.45400031348476  | -0.06082241898973 |
| H | 4.12421856842597  | 3.33068225283790  | -0.24021265857454 |
| O | 1.58313048869499  | 3.07732754452983  | -0.28668821891926 |
| H | 0.68185732972446  | 2.69163398841909  | -0.28169064334013 |
| N | 0.53508552183785  | 0.71115378421091  | -0.10142002600821 |
| N | -0.10434158797317 | -0.38258094315203 | -0.13451842483643 |
| C | -1.49993835936860 | -0.23724919558637 | -0.07080907323994 |
| C | -2.24838311438980 | -1.33517470620516 | -0.51914745435471 |
| C | -2.15764869961314 | 0.88821191171716  | 0.45444519867185  |
| C | -3.63112767754637 | -1.30232455846476 | -0.48572967960133 |
| H | -1.72020293274910 | -2.20176053384143 | -0.90433620940430 |
| C | -3.53869550697343 | 0.92165672042448  | 0.50249520459345  |
| H | -1.57595117461085 | 1.71619616366349  | 0.84373141292535  |
| C | -4.25948630914698 | -0.17095089013262 | 0.02503939359624  |
| H | -4.22848096552034 | -2.13343759082406 | -0.84085728447605 |
| H | -4.07067532060077 | 1.77294450742032  | 0.91092216318830  |
| N | -5.72898263228212 | -0.13237764887981 | 0.07613249686012  |
| O | -6.33793450934108 | -1.10868237876505 | -0.34759121959730 |
| O | -6.25548832101060 | 0.87478959514681  | 0.53687420632393  |

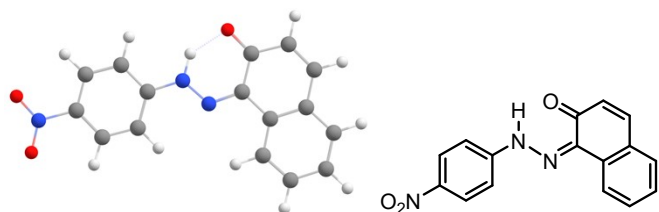

Main article molecule number: **PR1-keto**

Name: PR1 (Pigment Red #1), keto form

Qty of copies of the molecule modelled: 1

Qty of imaginary frequencies: 0

Final single point energy (Eh): -2011.97185737517

|   |                   |                  |                  |
|---|-------------------|------------------|------------------|
| C | -3.73803217608272 | 2.79644582182170 | 0.00032347321776 |
|---|-------------------|------------------|------------------|

|   |                   |                   |                   |
|---|-------------------|-------------------|-------------------|
| C | -2.70208442824400 | 1.87812996353103  | 0.00020631473691  |
| C | -2.96707798080638 | 0.50079910108170  | 0.00001604084660  |
| C | -4.31580519830430 | 0.06783671244378  | -0.00005997829635 |
| C | -5.35147324215531 | 1.01641472920444  | 0.00004756396960  |
| C | -5.07003125470196 | 2.36964711762874  | 0.00024392380673  |
| H | -3.51124080819599 | 3.85856570369603  | 0.00048656249223  |
| H | -1.67231783842580 | 2.21702954936780  | 0.00028280862156  |
| C | -1.90705773082755 | -0.50069329060241 | -0.00004814358735 |
| C | -4.60919563535811 | -1.33904153206707 | -0.00021915955509 |
| H | -6.38154627787650 | 0.66905879171839  | -0.00000754113742 |
| H | -5.87654340415677 | 3.09624883395094  | 0.00034285747513  |
| C | -3.64422471092785 | -2.28947392720325 | -0.00026726844262 |
| C | -2.24389508007566 | -1.93761550186375 | -0.00018413619433 |
| H | -5.65678639179949 | -1.63467344084587 | -0.00027985483183 |
| H | -3.87952984996040 | -3.34924968299156 | -0.00036425291398 |
| O | -1.35306521316088 | -2.82213975438781 | -0.00011410818222 |
| H | 0.04574723450082  | -1.91818707071323 | 0.00020793818606  |
| N | -0.66229253939475 | -0.04783741464092 | -0.00000673040216 |
| N | 0.32023087742480  | -0.91107874288996 | 0.00008827709932  |
| C | 1.64178355507320  | -0.49160126539721 | 0.00006080254694  |
| C | 1.99641800595804  | 0.86541208232911  | -0.00029193455791 |
| C | 2.63349732674631  | -1.48446528248458 | 0.00037553499765  |
| C | 3.33207254972606  | 1.21891625075177  | -0.00037423249412 |
| H | 1.22156441427697  | 1.62205507040455  | -0.00054356278568 |
| C | 3.96845334858188  | -1.12785246481931 | 0.00035384642771  |
| H | 2.34723158952584  | -2.53250845716271 | 0.00065275635868  |
| C | 4.30542529002805  | 0.22240127786143  | -0.00004353139527 |
| H | 3.63616927680979  | 2.25895190732266  | -0.00067891013755 |
| H | 4.75177896220903  | -1.87614667697618 | 0.00059997350355  |
| N | 5.72105017873793  | 0.60549161746403  | -0.00014384048344 |
| O | 6.55403680421188  | -0.29536504322336 | 0.00028289065899  |
| O | 5.98631534664387  | 1.80339701769107  | -0.00064737954811 |

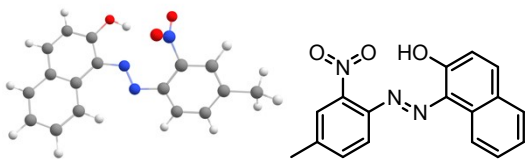

Main article molecule number: **PR3-enol**

Name: PR3 (Pigment Red #3), enol form

Qty of copies of the molecule modelled: 1

Qty of imaginary frequencies: 0

Final single point energy (Eh): -1045.254722988221

|   |                   |                   |                   |
|---|-------------------|-------------------|-------------------|
| C | 3.83350325769081  | -1.98505362799704 | -0.63570092924309 |
| C | 2.45087629640487  | -1.93743441496700 | -0.55925016930778 |
| C | 1.78574841271945  | -0.77914031443440 | -0.14226643944239 |
| C | 2.58599609985759  | 0.31382170092944  | 0.23202822453527  |
| C | 3.96608847422412  | 0.27744290040056  | 0.14627270169588  |
| C | 4.61601872315937  | -0.87958414076050 | -0.28900661953409 |
| H | 4.31798986061189  | -2.89568169308996 | -0.97801690906195 |
| H | 1.84318398687995  | -2.78811392789774 | -0.85240647302483 |
| H | 4.53646381270696  | 1.15418009004985  | 0.44174740241884  |
| C | 6.11615586863988  | -0.93708395868272 | -0.33837812761192 |
| H | 6.54242919678769  | 0.02927824414731  | -0.62271238772094 |
| H | 6.52676311210315  | -1.20051403116266 | 0.64412504349569  |
| H | 6.45973204610414  | -1.69019800100610 | -1.05238443955935 |
| N | 2.00115918583744  | 1.52865693475177  | 0.82399392018878  |
| O | 2.16300611547418  | 2.58170560613504  | 0.21426808513699  |
| O | 1.45892909728465  | 1.41079469847102  | 1.91031819304987  |
| N | 0.38633699105749  | -0.81127886455383 | -0.16127316069530 |
| N | -0.14443462754687 | 0.33362599723614  | -0.27640055984912 |
| C | -1.51202438094917 | 0.47812651306116  | -0.26607940324768 |
| C | -2.53626849360701 | -0.51068623950812 | -0.02634817264347 |
| C | -1.88599731607449 | 1.81772993716998  | -0.52319345797481 |
| C | -3.90214180508167 | -0.08650404078573 | -0.08440454415421 |
| C | -2.28320056949519 | -1.86705072180694 | 0.27556855346004  |
| C | -3.23971842236293 | 2.20498956384680  | -0.57328906403872 |
| C | -4.21290773201424 | 1.27167304158910  | -0.36268840860423 |

|   |                   |                   |                   |
|---|-------------------|-------------------|-------------------|
| C | -4.93906313167526 | -1.01420126860226 | 0.14348799470425  |
| C | -3.32371522849189 | -2.74830421329718 | 0.49834391881261  |
| H | -1.26238089614053 | -2.21445995620786 | 0.33111942212321  |
| H | -3.47113418960621 | 3.24448191495299  | -0.77955453299246 |
| H | -5.25957278974974 | 1.56356127370292  | -0.40122770277314 |
| C | -4.66021439041693 | -2.33091375720202 | 0.42946559268779  |
| H | -5.96767382324791 | -0.66580685129226 | 0.09243382272784  |
| H | -3.09614140515152 | -3.78452986181620 | 0.73203197302411  |
| H | -5.46494896248062 | -3.03833735048989 | 0.60480954165007  |
| O | -0.98232393683036 | 2.77845712294952  | -0.74233063194500 |
| H | -0.09563843662109 | 2.37594469616683  | -0.66187025628678 |

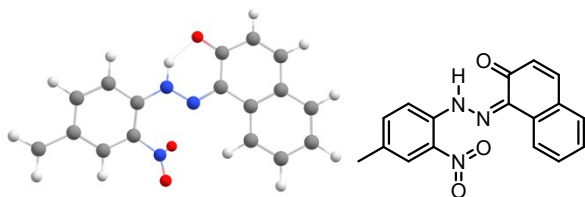

Main article molecule number: **PR3-keto trans**

Name: PR3 (Pigment Red #3), keto form, trans isomer

Qty of copies of the molecule modelled: 1

Qty of imaginary frequencies: 0

Final single point energy (Eh): -1045.261171350024

|   |                   |                   |                   |
|---|-------------------|-------------------|-------------------|
| C | 4.33900758045149  | 1.35645583538469  | -0.48254878513140 |
| C | 3.01107325249910  | 1.71315065568553  | -0.32080733350558 |
| C | 2.04119080029894  | 0.75257769245174  | -0.01125763477684 |
| C | 2.46981260554732  | -0.57194388834995 | 0.14474286404788  |
| C | 3.79195087641887  | -0.93387570984655 | -0.06081521450732 |
| C | 4.75449027902462  | 0.02556111369653  | -0.36979507921816 |
| H | 5.06704134870723  | 2.12573860092076  | -0.72579500328095 |
| H | 2.69778219386525  | 2.74390864035771  | -0.46248946515902 |
| H | 4.06665319711176  | -1.97902577320043 | 0.05105397491924  |
| C | 6.19733769237674  | -0.35813842164589 | -0.53794707199460 |
| H | 6.29684266686098  | -1.38437148647312 | -0.90170461249846 |
| H | 6.70342481023207  | 0.30762006722854  | -1.24267524084853 |
| H | 6.73120831056124  | -0.29299965905760 | 0.41806729749277  |
| N | 1.57160985812879  | -1.63452138546651 | 0.63095604114301  |
| O | 1.47271920754376  | -2.64062670392027 | -0.05822394671940 |
| O | 1.04662007416167  | -1.45797294688414 | 1.71888171759069  |
| N | 0.71781188541349  | 1.16321405357968  | 0.06598363023163  |
| N | -0.25420820908415 | 0.30254789695397  | -0.07164861725648 |
| C | -1.50475127049524 | 0.73531382153840  | -0.01245741327206 |
| C | -2.54885229615939 | -0.27055150958097 | -0.15698951613713 |
| C | -1.85337209038778 | 2.15480855617388  | 0.15820561568819  |
| C | -3.90210626753603 | 0.14828733835061  | -0.15016083624555 |
| C | -2.26374000944177 | -1.63783318160445 | -0.29067106720453 |
| C | -3.25612957686340 | 2.49404732660443  | 0.15376720505921  |
| C | -4.21000189720562 | 1.54240480026044  | 0.00625641617452  |
| C | -4.92587992708381 | -0.80413075183279 | -0.28719636564683 |
| C | -3.28887392014655 | -2.55815164505181 | -0.42421453746060 |
| H | -1.23177638198006 | -1.97138464019052 | -0.28104922524743 |
| H | -3.50465460188056 | 3.54401893718803  | 0.27406063648838  |
| H | -5.26037721175954 | 1.82859319667795  | 0.00748677074509  |
| C | -4.62621778576094 | -2.14599324246837 | -0.42528489760995 |
| H | -5.95997122924949 | -0.46855427598355 | -0.28017192375976 |
| H | -3.04762417441399 | -3.61228881434270 | -0.52470185571960 |
| H | -5.42271542701685 | -2.87644624688646 | -0.52914197593788 |
| O | -0.96898328621856 | 3.04019387018229  | 0.28544644597371  |
| H | 0.43493192348037  | 2.16389187955087  | 0.17928600358374  |



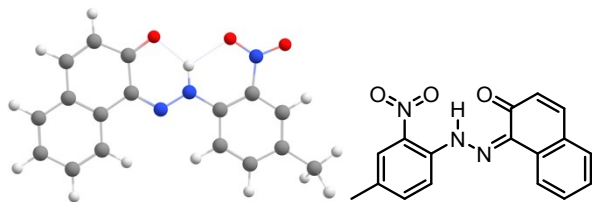

Main article molecule number: **PR3-keto cis**

Name: PR3 (Pigment Red #3), keto form, cis isomer

Qty of copies of the molecule modelled: 1

Qty of imaginary frequencies: 0

Final single point energy (Eh): -1045.266450183835

|   |                   |                   |                   |
|---|-------------------|-------------------|-------------------|
| C | 3.01991412208171  | 2.34467060230508  | -0.00009811994353 |
| C | 1.83213343885746  | 1.64744792572658  | -0.00008171470396 |
| C | 1.80807243969198  | 0.23970745521495  | 0.00000755375635  |
| C | 3.05935668469680  | -0.41914667523495 | 0.00009149100297  |
| C | 4.25307001971423  | 0.30618306126110  | 0.00007883404872  |
| C | 4.26158291960598  | 1.68980956692127  | -0.00001862723550 |
| H | 2.98961759203345  | 3.43196074922949  | -0.00017961248501 |
| H | 0.88612952286026  | 2.17313026116152  | -0.00014845957119 |
| H | 5.17980093617107  | -0.25564324369968 | 0.00014728874195  |
| C | 5.54469262951433  | 2.47030865973733  | -0.00001698616720 |
| H | 6.41332351635347  | 1.80786741714484  | -0.00022058830518 |
| H | 5.61010930632036  | 3.11728878077405  | -0.88206561962011 |
| H | 5.61029453635372  | 3.11697032365326  | 0.88225426566862  |
| N | 3.19000270105766  | -1.87818919789268 | 0.00020145823534  |
| O | 4.31798654657478  | -2.35666094004175 | 0.00042329455433  |
| O | 2.16051991196726  | -2.55559315149844 | 0.00008071431580  |
| N | 0.59311963444391  | -0.43117134547303 | 0.00001456056958  |
| N | -0.52072750222078 | 0.26373848857767  | 0.00002797510022  |
| C | -1.68459902940351 | -0.35798572713481 | 0.00002094208747  |
| C | -2.87370569998616 | 0.49161068317238  | 0.00003615385967  |
| C | -1.82806590471647 | -1.83157339936438 | -0.00000802442298 |
| C | -4.15172324574584 | -0.11894169704452 | 0.00003482679803  |
| C | -2.79909682940545 | 1.89202747869591  | 0.00005163489910  |
| C | -3.17509040082200 | -2.36604432204277 | 0.00001013245438  |
| C | -4.25645968524830 | -1.55469779079431 | 0.00002511634825  |
| C | -5.30508463096369 | 0.68100050139109  | 0.00004745387104  |
| C | -3.94899877083216 | 2.66338051110569  | 0.00006331896282  |
| H | -1.82448731711376 | 2.36675062738588  | 0.00005579915663  |
| H | -3.26479199299759 | -3.44800253872164 | 0.00000663331033  |
| H | -5.25647390172854 | -1.98484165263206 | 0.00003241970644  |
| C | -5.21051634806085 | 2.06061954788891  | 0.00006089545758  |
| H | -6.27879836923448 | 0.19758095806551  | 0.00004740707674  |
| H | -3.86720024929273 | 3.74644239154377  | 0.00007504116156  |
| H | -6.10850200503577 | 2.67073264509247  | 0.00007062326962  |
| O | -0.83368139076971 | -2.58209518682397 | 0.00000204995868  |
| H | 0.54571381527935  | -1.46553676764977 | -0.00000213191755 |

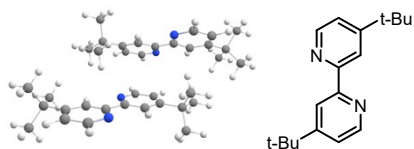

Main article molecule number: **1**

Name: 4,4'-di-t-butyl-2,2'-bipyridine

Qty of copies of the molecule modelled: 2

Qty of imaginary frequencies: 0

Final single point energy (Eh): -1619.3857503721

|   |                  |                  |                   |
|---|------------------|------------------|-------------------|
| C | 3.92732784162321 | 9.54929003189110 | 33.20033250623817 |
|---|------------------|------------------|-------------------|

|   |                   |                   |                    |
|---|-------------------|-------------------|--------------------|
| H | 3.23886478206480  | 10.06666608382867 | 32.52512130362345  |
| H | 3.35477505278079  | 9.17765217834772  | 34.05860011638485  |
| H | 4.33836760226128  | 8.68622535127841  | 32.66757412165111  |
| H | 3.66067391906175  | 12.18732150850289 | 33.86519669525948  |
| N | 1.66221558967236  | 10.88399472457393 | 30.30723592887676  |
| N | 3.25826407758058  | 14.11667704246955 | 30.44088013784869  |
| C | 0.78769880661516  | 10.16644801955850 | 31.01414061764351  |
| H | 0.51686280001496  | 9.19568388192338  | 30.59868027179347  |
| C | 0.23028476703497  | 10.58797476169592 | 32.21268291897461  |
| H | -0.47724069015560 | 9.94163619345103  | 32.72313302403614  |
| C | 0.58972504748557  | 11.83443735260529 | 32.73862679798675  |
| C | 1.49962168308924  | 12.58436714969409 | 32.00010303642293  |
| H | 1.83128277635516  | 13.56392906265622 | 32.31982152805293  |
| C | 2.01089741836792  | 12.08229302494655 | 30.79676474228285  |
| C | 2.97236807396338  | 12.88131364925247 | 29.99378579130219  |
| C | 3.52992932016148  | 12.35446057877475 | 28.82945644490439  |
| H | 3.24524390348592  | 11.35012362149213 | 28.53977115173543  |
| C | 4.42722054943420  | 13.10921315157296 | 28.07386532356833  |
| C | 4.70747074394360  | 14.39417846893961 | 28.54095283394506  |
| H | 5.39430133158687  | 15.05220062014749 | 28.02052506101196  |
| C | 4.10350369842244  | 14.84165324854886 | 29.71274093698780  |
| H | 4.32146587006320  | 15.84344081574485 | 30.08515501552749  |
| C | -0.01679979480530 | 12.32123348548710 | 34.05302904816630  |
| C | -1.53953960507309 | 12.46774104036031 | 33.86966429961451  |
| H | -2.00529693160297 | 11.51702305930308 | 33.59238020259446  |
| H | -1.76654640339928 | 13.19721693555262 | 33.08496398616281  |
| H | -1.99931568760713 | 12.81077730576584 | 34.80351952628487  |
| C | 0.27027501611497  | 11.28790035305850 | 35.15861223674412  |
| H | -0.14811831888520 | 11.63275351878705 | 36.11089258533789  |
| H | 1.34875841854940  | 11.14836216350651 | 35.28642123095721  |
| H | -0.17278644911449 | 10.31366516142448 | 34.93173612116314  |
| C | 0.55575831853399  | 13.67341481625121 | 34.49192834887318  |
| H | 0.09538282092344  | 13.97166677846626 | 35.43950092731398  |
| H | 0.34899629334410  | 14.46010231286341 | 33.75894872859575  |
| H | 1.63882745485557  | 13.62194040576363 | 34.64806361146146  |
| C | 5.02163972039393  | 12.53759167722860 | 26.78882381054548  |
| C | 3.90217091364209  | 12.46472991926320 | 25.73226333719658  |
| H | 4.29468771452005  | 12.04867720840374 | 24.79714967713632  |
| H | 3.49474446960929  | 13.46013047390505 | 25.52388810912371  |
| H | 3.08056277110865  | 11.82679379307464 | 26.073173217824501 |
| C | 6.16458755787136  | 13.40629279784976 | 26.25055744603586  |
| H | 5.82255866913780  | 14.40691717286916 | 25.96523442849474  |
| H | 6.58714559883312  | 12.93897106302160 | 25.35455834379075  |
| N | 7.90024300123907  | 8.32220191348973  | 29.99161919608978  |
| N | 7.29340384663029  | 11.87284822467585 | 30.22435013451179  |
| C | 8.55053166932933  | 7.47040333900539  | 29.19667378909623  |
| H | 8.47510959182810  | 6.41546068516544  | 29.46089934073406  |
| C | 9.28516459208564  | 7.85499802364125  | 28.08412688501257  |
| H | 9.77413649335920  | 7.09400439637318  | 27.48314828247010  |
| C | 9.37910944567460  | 9.21333201772829  | 27.75818411263845  |
| C | 8.71911182946275  | 10.10234407363104 | 28.59840894942218  |
| H | 8.74081101009796  | 11.17172081239259 | 28.43439492839077  |
| C | 7.98356344573418  | 9.62540126167030  | 29.69016131266196  |
| C | 7.23713032276790  | 10.57115519850042 | 30.55961972301571  |
| C | 6.51595941608235  | 10.11063221390583 | 31.65979907019074  |
| H | 6.52167799228037  | 9.04579206285336  | 31.86210583340066  |
| C | 5.81459090246707  | 11.00825719379011 | 32.46673409651690  |
| C | 5.86997488882811  | 12.35314449955816 | 32.10179456755662  |
| H | 5.33823511723810  | 13.11929329070660 | 32.65416360934975  |
| C | 6.61791909083039  | 12.72597158488989 | 30.98872954288132  |
| H | 6.66597700601248  | 13.77467230172975 | 30.69831494990771  |
| C | 10.16394436862274 | 9.66511539273860  | 26.52894461836866  |
| C | 11.63308646140573 | 9.22805574863086  | 26.67830903899846  |
| H | 11.72499028175592 | 8.14066691538984  | 26.76057107246909  |
| H | 12.08157761781574 | 9.67392989406880  | 27.57241891433226  |
| H | 12.21200448610129 | 9.54991560203931  | 25.80512607213641  |
| C | 9.55486223960484  | 9.00470028792325  | 25.27725297042235  |
| H | 10.10014121228538 | 9.32430075363432  | 24.38192762050193  |
| H | 8.50398657776576  | 9.29156911676078  | 25.16167702046500  |
| H | 9.60311170705988  | 7.91290154468486  | 25.32900962477180  |
| C | 10.11899342739919 | 11.18562689289432 | 26.344613139729599 |
| H | 10.68529310653122 | 11.46010083069045 | 25.44613139729599  |
| H | 10.56275059860532 | 11.71310521832080 | 27.19318606812434  |
| H | 9.09165240172280  | 11.54412114374681 | 26.21223511624424  |
| C | 5.03919739621977  | 10.50116424098170 | 33.67990557968609  |
| C | 6.00097504019648  | 9.74402517297979  | 34.61492217178948  |
| H | 5.45599003479090  | 9.38012058236544  | 35.49340525707478  |
| H | 6.80794316257197  | 10.40054975141166 | 34.95820733535640  |
| H | 6.45505321851941  | 8.88105043427545  | 34.11931870782682  |
| C | 4.39554892624607  | 11.64543576777819 | 34.47038340962619  |
| H | 5.14366678594258  | 12.35772166463205 | 34.83549697453594  |
| H | 3.87438734788532  | 11.23530483316456 | 35.34193916617919  |

|   |                  |                   |                   |
|---|------------------|-------------------|-------------------|
| C | 5.57600693212437 | 11.12671048285094 | 27.05120428049451 |
| H | 6.32807887199777 | 11.15408471301702 | 27.84384716315487 |
| H | 6.04516040886783 | 10.73678640539101 | 26.14035365938110 |
| H | 4.79439211467618 | 10.42167575902082 | 27.34805175703604 |
| H | 6.96774691949400 | 13.50655939279380 | 26.99009390932919 |

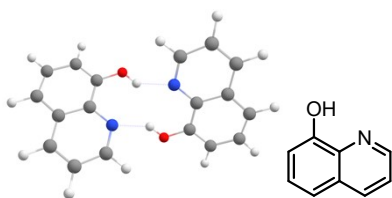

Main article molecule number: 2

Name: 8-hydroxyquinoline

Qty of copies of the molecule modelled: 2

Qty of imaginary frequencies: 0

Final single point energy (Eh): -954.140341993345

|   |                   |                   |                   |
|---|-------------------|-------------------|-------------------|
| N | 0.65079015041470  | 2.14155279026096  | 0.00933918057436  |
| N | -0.91382388426699 | 5.14247264676031  | -0.06529371049949 |
| C | 0.23985400361215  | 1.00248220887415  | -0.51502141308126 |
| C | -0.49856873044556 | 6.25722333963756  | -0.63650285467253 |
| H | -0.83750493653250 | 0.88108169393396  | -0.62261388647117 |
| H | 0.57968750519146  | 6.37430117648051  | -0.73994588078942 |
| C | 1.11505617117783  | -0.02808296811545 | -0.90946848499761 |
| C | -1.37033479246985 | 7.26860590507052  | -1.08441764479521 |
| H | 0.71366630784736  | -0.94007550835690 | -1.33951419965126 |
| H | -0.96539586437794 | 8.16064313711216  | -1.55140023479644 |
| C | 2.46335215441996  | 0.14187229662392  | -0.72352435589821 |
| C | -2.72023990997119 | 7.10633821930022  | -0.90303257790373 |
| H | 3.16958180088935  | -0.63696406708152 | -1.00120971027284 |
| H | -3.42409470555948 | 7.87157541968830  | -1.22149068762408 |
| C | 2.95113088345761  | 1.34143377558968  | -0.15883627444774 |
| C | -3.21275854598142 | 5.93288981449689  | -0.28963960126299 |
| C | 4.32262992360076  | 1.57725750979035  | 0.08025937213655  |
| C | -4.58631014329348 | 5.70712325913625  | -0.05267723183947 |
| H | 5.04868728219456  | 0.81223974026076  | -0.17877054388315 |
| H | -5.31020831918346 | 6.45929877581343  | -0.35212665435626 |
| C | 4.71428012773914  | 2.77090181319444  | 0.64012273503345  |
| C | -4.98264542506188 | 4.53930196841603  | 0.55626976708543  |
| H | 5.76674990689308  | 2.95882887182068  | 0.83248907306520  |
| H | -6.03675816713264 | 4.35932346823851  | 0.74725189243955  |
| C | 3.77971150816855  | 3.76870856646836  | 0.96208647546734  |
| C | -4.05075691200732 | 3.55747830364732  | 0.93087505620887  |
| H | 4.10102703878726  | 4.71261188384605  | 1.39094862624384  |
| H | -4.37600559394663 | 2.63353076765527  | 1.39849319890484  |
| C | 2.42939534858011  | 3.57747770291209  | 0.73340041131402  |
| C | -2.69842650541020 | 3.73921985675801  | 0.70631409220629  |
| C | 1.98436093423721  | 2.33749064484516  | 0.18235547211837  |
| C | -2.24879959945046 | 4.95368687135408  | 0.10441861056113  |
| O | 1.57505401220291  | 4.56413916347064  | 1.04680708868541  |
| O | -1.84680464138685 | 2.76845917201198  | 1.07183201977354  |
| H | 0.66883403906593  | 4.40928931160490  | 0.68261034920390  |
| H | -0.93722242200208 | 2.90529246848028  | 0.70837252622076  |

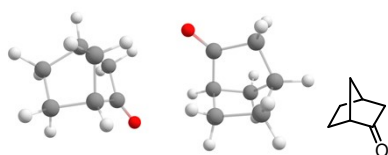

Main article molecule number: 3

Name: Norcamphor

Qty of copies of the molecule modelled: 2

Qty of imaginary frequencies: 0

Final single point energy (Eh): -695.817074433485

|   |                   |                  |                   |
|---|-------------------|------------------|-------------------|
| C | 0.67059079884431  | 7.76175366788943 | 0.21176661755461  |
| C | -0.55968131128706 | 7.59761221878576 | 1.12133175050621  |
| C | 0.90012520504285  | 6.03964583300230 | 1.91528593423339  |
| H | 0.48017825773172  | 7.65579475807095 | -0.86156766292281 |
| H | 1.16453654948527  | 8.73010652853500 | 0.36900724224012  |
| C | 0.11219059237563  | 7.24383519135258 | 2.46583116986971  |
| H | -0.60508066192158 | 6.95369815697963 | 3.24086342820773  |
| H | 0.75543690926973  | 8.04348432280138 | 2.85083223531731  |
| C | -1.24915550854154 | 6.26567553480214 | 0.76000986363676  |
| H | -2.21484950363540 | 6.18017592678499 | 1.26868689253002  |
| H | -1.43504551009863 | 6.18133056305818 | -0.31581914323657 |
| C | -0.24421809782257 | 5.19436931859655 | 1.28012041837435  |
| H | -0.68207594177421 | 4.55825939801708 | 2.05455211240283  |
| H | 0.12687992588666  | 4.53249223267731 | 0.49153229888774  |
| H | -1.22720166890098 | 8.46339150489338 | 1.13369488108591  |
| H | 1.55194664922275  | 5.47615565208124 | 2.58315893243579  |
| C | 1.60041087363834  | 6.65560984441803 | 0.71999665105638  |
| O | 2.65671513707297  | 6.32310227711151 | 0.22549897124595  |
| C | 4.02962094256689  | 3.30745845170722 | 1.24085307738477  |
| C | 4.39371444141828  | 2.76280533049345 | -0.15152610077314 |
| C | 2.22601462724446  | 2.13119351949177 | 0.11015542055905  |
| H | 4.67507263455557  | 2.97568816257922 | 2.06117646128185  |
| H | 4.00032745164621  | 4.40548001526660 | 1.23842980793936  |
| C | 3.05519000228465  | 2.94980192791073 | -0.89893609832560 |
| H | 3.05675593209710  | 2.50351730397258 | -1.89969226075893 |
| H | 2.75226229937148  | 4.00010985424926 | -0.96199553105604 |
| C | 4.49302032095997  | 1.22590895614829 | -0.06162541536132 |
| H | 4.90979081716116  | 0.80816275263914 | -0.98398052653984 |
| H | 5.13533614525899  | 0.90568298818093 | 0.76533789105770  |
| C | 3.00972811678317  | 0.78654809309990 | 0.13171650895933  |
| H | 2.66658021708217  | 0.15923282376965 | -0.69746382321860 |
| H | 2.84319246267696  | 0.22950557733017 | 1.05899991670237  |
| H | 5.26133911912101  | 3.24678808969105 | -0.60686594443106 |
| H | 1.15008588480489  | 2.02912805249208 | -0.04390484575005 |
| C | 2.59848045590145  | 2.80582572814768 | 1.42099754055485  |
| O | 1.91269543447707  | 2.90663944297211 | 2.41528132834975  |

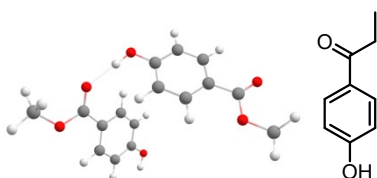

Main article molecule number: 4

Name: Methylparaben

Qty of copies of the molecule modelled: 2

Qty of imaginary frequencies: 0

Final single point energy (Eh): -1070.537388950418

|   |                  |                   |                   |
|---|------------------|-------------------|-------------------|
| O | 1.84011849141661 | 1.43325747605527  | -1.18070123063178 |
| C | 2.81481306307643 | -0.55911764425437 | -2.08841651479450 |
| C | 3.14023754499612 | -1.10696134185689 | -0.83906479800833 |
| H | 2.97608054117070 | -0.52560583290643 | 0.06222127003164  |
| O | 4.42452749743008 | -4.36356735567636 | -1.74987562125362 |
| H | 4.52698937143332 | -4.78022522767449 | -2.61389942791143 |
| C | 3.67854103338094 | -2.37505388221170 | -0.74159738120714 |
| H | 3.93151912885327 | -2.80588191734635 | 0.22130742178443  |
| C | 3.89790385574062 | -3.12130105428406 | -1.90207829571823 |
| C | 3.58204386430482 | -2.58768945024902 | -3.15528985786515 |
| H | 3.75437227191117 | -3.17190985303228 | -4.05660132427918 |
| C | 3.04690265746999 | -1.31430506446831 | -3.24474426830727 |

|   |                   |                   |                   |
|---|-------------------|-------------------|-------------------|
| H | 2.79992858193524  | -0.90182985104808 | -4.21636643098912 |
| C | 2.22083622545037  | 0.78498519051726  | -2.14749756640098 |
| O | 2.12144125553362  | 1.26080789555649  | -3.40210747864238 |
| C | 1.52024457273756  | 2.56760180042719  | -3.52373120943217 |
| H | 2.10969063992522  | 3.30945197560337  | -2.97866579158915 |
| H | 1.51796312826759  | 2.78464498209233  | -4.59186206063274 |
| H | 0.50118484813838  | 2.55653643624905  | -3.12782999479039 |
| H | 1.43091295260771  | 1.05276687298956  | 0.54521347621047  |
| O | -2.18378547702614 | -4.12973213718691 | 3.38745084552851  |
| C | -1.13280350567082 | -2.47837240085718 | 2.01892988488071  |
| O | -2.54382312772500 | -4.15681935119150 | 1.15691838084187  |
| C | -0.49536102028164 | -1.86046880822046 | 3.10297554652448  |
| H | -0.65294824774053 | -2.26748769032066 | 4.09691111641474  |
| O | 1.31920865352240  | 0.82383222096837  | 1.49090801969915  |
| C | 0.31746397138300  | -0.75962074643555 | 2.91346136742569  |
| H | 0.81656223263283  | -0.27566916366452 | 3.74695684120387  |
| C | 0.50826645023616  | -0.24794612107355 | 1.62383824558640  |
| C | -0.12993737626411 | -0.85366064419272 | 0.53330939738897  |
| H | 0.01339326965723  | -0.45055776197518 | -0.46520067664770 |
| C | -0.93943652167160 | -1.95991968319357 | 0.73363002700064  |
| H | -1.42999635043072 | -2.42694194138087 | -0.11316322073686 |
| C | -1.98566413772891 | -3.65089329832304 | 2.28872262656921  |
| C | -3.39032096651093 | -5.30091241442103 | 1.36531732410119  |
| H | -3.75580228652965 | -5.57801704538095 | 0.37560259426339  |
| H | -4.22400483729684 | -5.04762530293783 | 2.02684667884477  |
| H | -2.82321224833464 | -6.12339186469486 | 1.81113208553804  |

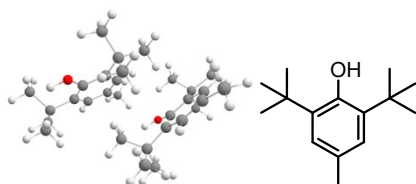

Main article molecule number: 5

Name: BHT

Qty of copies of the molecule modelled: 2

Qty of imaginary frequencies: 0

Final single point energy (Eh): -1322.23997066399

|   |                   |                   |                   |
|---|-------------------|-------------------|-------------------|
| C | -1.46032918050348 | 1.37493248902218  | 0.51712037350362  |
| C | -2.35701639261029 | 0.42831816321459  | 1.33186730260362  |
| C | -2.92359443148303 | -0.69968636398341 | 0.44412429095265  |
| H | -3.53839052239674 | -0.31756981607467 | -0.37113645831931 |
| H | -3.54149666159723 | -1.36807486785974 | 1.05590521072291  |
| H | -2.10650386367196 | -1.29684019481158 | 0.02550451513037  |
| C | -3.50784762774561 | 1.22543317106351  | 1.97986530983250  |
| H | -4.15429618715078 | 1.68928915711588  | 1.23322339180270  |
| H | -3.10722534334127 | 2.01241938677036  | 2.62858168378347  |
| H | -4.11831372761655 | 0.55439864538652  | 2.59558304047750  |
| C | -1.57487328040454 | -0.25588214837473 | 2.46334502086887  |
| H | -2.24962741635714 | -0.93222475918021 | 2.99901804660901  |
| H | -1.18788941834182 | 0.46557736683900  | 3.19170406129916  |
| H | -0.74253387981688 | -0.85579019255112 | 2.07946746408340  |
| C | -1.94572339658167 | 2.07843587955405  | -0.60587371517953 |
| O | -3.26574348723942 | 1.86972026050584  | -0.93115910506778 |
| H | -3.49916113739779 | 2.43720599160217  | -1.67060694755342 |
| C | -1.13139381784841 | 2.94445738009441  | -1.36366242579171 |
| C | -1.65392237879565 | 3.68173626687853  | -2.60991742895566 |
| C | -2.10383498912737 | 2.67471118184470  | -3.69430404165472 |
| H | -2.89289580679236 | 1.98383729522251  | -3.38136366899107 |
| H | -1.25240539434943 | 2.05686936830061  | -3.99735812298564 |
| H | -2.46842028476590 | 3.21348776444433  | -4.57629351927844 |
| C | -2.79395494393365 | 4.66160171455304  | -2.24227064357664 |
| H | -2.43687855129489 | 5.38459481530439  | -1.50201051773052 |
| H | -3.68981544253705 | 4.19784885927581  | -1.81530619732076 |
| H | -3.11476177662074 | 5.21092597687792  | -3.13464196141423 |
| C | -0.56140685136516 | 4.54263210627155  | -3.26546335818807 |
| H | -0.20050177413371 | 5.32831745435177  | -2.59407585550659 |
| H | -0.97852350021005 | 5.03110766555463  | -4.15230536445335 |
| H | 0.29237853571774  | 3.93925064001246  | -3.59009073505184 |

S13

|   |                   |                   |                   |
|---|-------------------|-------------------|-------------------|
| C | 0.18749072209174  | 3.11802562209917  | -0.93482180501531 |
| H | 0.84390154288359  | 3.78991381687430  | -1.47609270945601 |
| C | 0.70269820395869  | 2.46463942518583  | 0.17786886611812  |
| C | 2.12751390224489  | 2.68916130123375  | 0.61143401695047  |
| H | 2.20215682778612  | 2.76610608149428  | 1.70095238691928  |
| H | 2.53134030149512  | 3.60917019859793  | 0.17841386613124  |
| H | 2.78196044791984  | 1.86286414793702  | 0.30693006229814  |
| C | -0.13084922486469 | 1.59257506378262  | 0.87590778550535  |
| H | 0.28107729956183  | 1.06970693252936  | 1.73114495175361  |
| C | 1.63834186701143  | -2.37329233613045 | 1.67863942912801  |
| C | 2.71058901890034  | -1.89618220882620 | 2.67043591096426  |
| C | 2.52036304159470  | -0.40344503893141 | 3.00303226822220  |
| H | 2.61888816859331  | 0.22169033070767  | 2.11581408292078  |
| H | 3.27472139875739  | -0.08758362423461 | 3.73361642445469  |
| H | 1.53126602190022  | -0.23376955334333 | 3.44408604702939  |
| C | 4.11745194376089  | -2.13495098383150 | 2.08401278967821  |
| H | 4.25730814395584  | -3.19746622493520 | 1.85599041573620  |
| H | 4.87813445556976  | -1.84124284581595 | 2.81702386830416  |
| H | 4.28211622355826  | -1.56210675066195 | 1.17074881831654  |
| C | 2.64122617506832  | -2.66455011075237 | 3.99907833559119  |
| H | 3.43558420825281  | -2.29995540012892 | 4.65881984026945  |
| H | 2.79472577803687  | -3.74028816174566 | 3.86054608872470  |
| H | 1.68756315220471  | -2.50965536490804 | 4.51565418099596  |
| C | 1.53859038582006  | -1.84681536341115 | 0.37359785011183  |
| O | 2.41017541123448  | -0.83286272450259 | 0.04681324280938  |
| H | 2.06859364363139  | -0.38322988355568 | -0.73397354165609 |
| C | 0.61846217343268  | -2.34576879754830 | -0.57255583321511 |
| C | 0.62249096600238  | -1.88920295878472 | -2.04502454980634 |
| C | 0.25018951124997  | -0.39791739482120 | -2.20428039650304 |
| H | 0.92220206403304  | 0.32626459613547  | -1.72693058366767 |
| H | -0.74105587869966 | -0.20044150526029 | -1.78627565419259 |
| H | 0.23463549500200  | -0.14014080309130 | -3.26968779149586 |
| C | 2.00004273539472  | -2.18348569723776 | -2.68062813220305 |
| H | 2.82876153283528  | -1.67438957806737 | -2.18269723222628 |
| H | 1.99617081482977  | -1.87600373244182 | -3.73280456957604 |
| H | 2.20698228223981  | -3.25786963844916 | -2.63821385637345 |
| C | -0.41380099475106 | -2.66113681741021 | -2.87879319720629 |
| H | -0.22606229166216 | -3.73940567831784 | -2.86436060510899 |
| H | -0.35120555767154 | -2.32662201701657 | -3.91962436568825 |
| H | -1.43660868216307 | -2.47594305501492 | -2.53352057397283 |
| C | -0.26909090462292 | -3.33257825649679 | -0.13635631973383 |
| H | -1.00752854074269 | -3.73222589560249 | -0.82218279243219 |
| C | -0.24771439992353 | -3.83728843695658 | 1.15811672531762  |
| C | -1.26353024092298 | -4.85208257967017 | 1.60867225445867  |
| H | -0.83841602197821 | -5.54622980941816 | 2.34040114307334  |
| H | -1.64434807638741 | -5.43708744752738 | 0.76597456369991  |
| H | -2.12385570370498 | -4.36293920142756 | 2.08326788738688  |
| C | 0.72620828837576  | -3.36683076283999 | 2.03341520214989  |
| H | 0.75753126116802  | -3.78908771149115 | 3.03153887442543  |

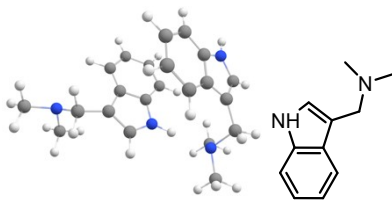

Main article molecule number: 6

Name: Gramine

Qty of copies of the molecule modelled: 2

Qty of imaginary frequencies: 0

Final single point energy (Eh): -1073.92746719103

|   |                   |                   |                   |
|---|-------------------|-------------------|-------------------|
| H | 13.04757828433263 | 24.44665970895246 | 12.72191219619079 |
| H | 14.11782145749662 | 26.12592564346862 | 10.71298729657407 |
| H | 14.17235202837920 | 25.71390244271148 | 16.74412377870799 |
| H | 14.87354753037177 | 26.62788062988737 | 18.09320453725962 |
| N | 13.94118478386574 | 24.63126479707890 | 13.14288790456415 |
| N | 16.27182189859538 | 25.68192168494286 | 16.83545043609470 |

|   |                   |                   |                   |
|---|-------------------|-------------------|-------------------|
| C | 14.33959305683936 | 24.19520405337746 | 14.38893090939262 |
| C | 15.58554469305796 | 24.69518597001975 | 14.67628027919826 |
| C | 17.11927137383335 | 26.24587827935832 | 13.24618565759556 |
| C | 17.15669468105306 | 26.94981359074009 | 12.05538475113147 |
| C | 16.08179538471734 | 26.90530365099699 | 11.14990623709319 |
| C | 14.95264541915674 | 26.14513627669567 | 11.40742916208035 |
| C | 14.92177798364654 | 25.43832543104135 | 12.60671717208425 |
| C | 15.98203237857461 | 25.48514611688424 | 13.54423584309121 |
| C | 16.37413251051169 | 24.51219706701642 | 15.92868471384551 |
| C | 17.34310427956223 | 25.65997245300085 | 17.83240927453649 |
| C | 14.96650415832547 | 25.71366391576337 | 17.49677942860826 |
| H | 13.70436038542643 | 23.54706824582973 | 14.97873673466268 |
| H | 17.94484613648965 | 26.30909229064219 | 13.95009436476253 |
| H | 18.02073144388463 | 27.56458412291483 | 11.82257502513978 |
| H | 16.13264635457255 | 27.48770406895347 | 10.23510307632499 |
| H | 17.43446007407753 | 24.39258361764607 | 15.67111219845809 |
| H | 16.06481106605488 | 23.58705823587121 | 16.45311262874082 |
| H | 14.81389581134586 | 24.84212664922105 | 18.16221522862821 |
| H | 17.26366395270151 | 26.54113280547870 | 18.47832973793021 |
| H | 18.31749358778276 | 25.68734173501541 | 17.33254108829709 |
| H | 17.30872885548916 | 24.75990651834343 | 18.47580517154903 |
| H | 16.08530152993795 | 27.43152476118932 | 15.84378960192137 |
| H | 13.40622533766367 | 27.06348272739402 | 14.99379984104313 |
| H | 15.83617683246013 | 32.12901298181630 | 15.32479693400909 |
| H | 15.95324336921017 | 33.82775554229995 | 14.81781679667184 |
| N | 15.94636098137521 | 28.30754890948309 | 15.32911161846013 |
| N | 16.73384970688533 | 32.44097312186991 | 13.45278595821554 |
| C | 16.96186693882186 | 29.18950629332214 | 15.02656868605802 |
| C | 16.57447246487224 | 30.04570970795682 | 14.02722056465342 |
| C | 14.31903223586372 | 30.13636726943290 | 12.72062067519740 |
| C | 13.09452863247878 | 29.49650303283189 | 12.60606294686531 |
| C | 12.76739613563774 | 28.39976283768276 | 13.42297141127007 |
| C | 13.65628825588041 | 27.91920747137173 | 14.37297514205563 |
| C | 14.88883848126843 | 28.55905476518927 | 14.48505685063100 |
| C | 15.24125250784031 | 29.66232304734370 | 13.66227159885843 |
| C | 17.39481296838333 | 31.12908606627705 | 13.41437558955358 |
| C | 17.54318182412780 | 33.43171590152757 | 12.75535871625148 |
| C | 16.47392243117136 | 32.86392995709773 | 14.82451838168105 |
| H | 17.90621188553528 | 29.14391710935429 | 15.55473621259908 |
| H | 14.56524357615770 | 30.99417813530045 | 12.10191378851971 |
| H | 12.36881707244236 | 29.85122128812066 | 11.87959081604543 |
| H | 11.79751281506822 | 27.92234682564852 | 13.31122331881759 |
| H | 17.58200901421282 | 30.89592482682608 | 12.35480812497736 |
| H | 18.38803361094766 | 31.15895967907968 | 13.91501622431026 |
| H | 17.40410815031526 | 32.97758589127604 | 15.42010466623900 |
| H | 17.02285584194614 | 34.39589651991339 | 12.74298431934440 |
| H | 17.70473565040327 | 33.11875603154991 | 11.71728071888154 |
| H | 18.53727217894446 | 33.58600929698616 | 13.22506566432404 |

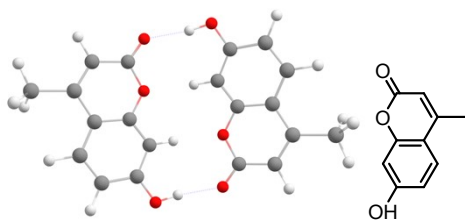

Main article molecule number: 7

Name: Hymecromone

Qty of copies of the molecule modelled: 2

Qty of imaginary frequencies: 0

Final single point energy (Eh): -1222.96523278743

|   |                   |                   |                  |
|---|-------------------|-------------------|------------------|
| O | -4.37430450465375 | 1.01608073030708  | 5.14835164077014 |
| O | -3.09933360318085 | 0.69442563631339  | 6.93351621229102 |
| O | -6.54273162797585 | 1.25616628804854  | 0.96379634533495 |
| H | -5.65786482343705 | 1.57637249198308  | 0.68843242486251 |
| C | -4.19561166316607 | 0.51262596228369  | 6.42437302718150 |
| C | -5.32061186019267 | -0.15905161196031 | 7.00677787170265 |
| H | -5.19056673269285 | -0.50276187329101 | 8.02687503987233 |
| C | -6.47662387184019 | -0.38431628240616 | 6.31471207166313 |
| C | -6.57945956244029 | 0.05997973015200  | 4.95241878893605 |
| C | -7.67804849215841 | -0.16572742598165 | 4.09621519356632 |

S15

|   |                   |                   |                   |
|---|-------------------|-------------------|-------------------|
| H | -8.54819662199110 | -0.69293334881926 | 4.47466461472914  |
| C | -7.66505493751523 | 0.24602685131665  | 2.78064499487835  |
| H | -8.50275799088449 | 0.04696420496985  | 2.12082987506864  |
| C | -6.53830062934308 | 0.91752653219358  | 2.26412093751212  |
| C | -5.46127739910663 | 1.20436055998523  | 3.09768235331179  |
| H | -4.59272478598689 | 1.73174865967788  | 2.72564533828704  |
| C | -5.48997897663009 | 0.75615252535484  | 4.40460712287227  |
| C | -7.62099242204469 | -1.10725680940372 | 6.95494702536887  |
| H | -7.85224769843465 | -2.02869612745632 | 6.40822683391987  |
| H | -8.52546033781446 | -0.48850980383313 | 6.94293180044973  |
| H | -7.39228071801064 | -1.36763694742501 | 7.98993412633128  |
| H | -2.43926960826875 | 1.59314229062389  | 4.26267251113515  |
| H | -1.32411209395111 | 0.89452997578162  | 6.14836399735342  |
| O | -2.61783181310057 | 1.71558083906175  | 1.73735054430718  |
| O | -3.88043318743935 | 1.86216701594112  | -0.07896355796235 |
| C | -2.75984555086976 | 1.65495807607290  | 0.36272101868488  |
| O | -0.41091800824267 | 0.79582244549305  | 5.80467805334944  |
| C | -1.57305845635266 | 1.36218266120485  | -0.38712249226269 |
| H | -1.68094310998196 | 1.36865539035428  | -1.46597602127240 |
| C | -0.38378152796799 | 1.06069841865571  | 0.21369271498735  |
| C | -0.30766170853728 | 1.02921417454708  | 1.64795333103249  |
| C | 0.82792704043134  | 0.66544062795097  | 2.40229872126205  |
| H | 1.74873891078988  | 0.40838761942094  | 1.88805984366756  |
| C | 0.79155254024551  | 0.60465867207338  | 3.77919482066862  |
| H | 1.66105650654601  | 0.29965355068902  | 4.35162600690988  |
| C | -0.39859899904386 | 0.91803245709730  | 4.46653493227894  |
| C | -1.51986805782473 | 1.33367678940380  | 3.75443428940445  |
| C | -1.46315563727842 | 1.35996061490907  | 2.37407095525587  |
| C | 0.82678565499766  | 0.74048288434322  | -0.60733668521754 |
| H | 1.17924012271219  | -0.27591926485636 | -0.39761089817065 |
| H | 1.64918145790500  | 1.42398336534234  | -0.36763678775840 |
| H | 0.61040478473208  | 0.81818145388082  | -1.67431893656339 |

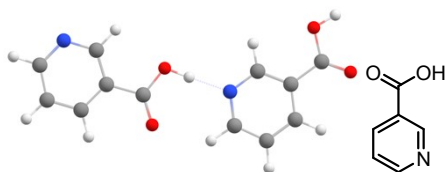

Main article molecule number: 8

Name: Nicotinic Acid

Qty of copies of the molecule modelled: 2

Qty of imaginary frequencies: 0

Final single point energy (Eh): -873.592372600774

|   |                    |                   |                   |
|---|--------------------|-------------------|-------------------|
| O | -6.40408672599286  | 4.78979943938807  | -3.52409961964615 |
| C | -1.94603516538560  | 4.93935672793196  | -2.81064106349096 |
| C | -10.55975842706006 | 4.29349090756707  | -4.01326565990257 |
| C | -2.70121798627381  | 2.38675335386233  | -2.19762002989032 |
| C | -1.35568073525728  | 2.73643216602791  | -2.08061037814413 |
| C | -0.97588326894370  | 4.04224895977972  | -2.39469073485245 |
| C | -3.26537663151991  | 4.50763978864856  | -2.90004082454224 |
| C | -0.31534050276336  | 1.77712225512195  | -1.63512863454443 |
| N | -3.63306225439650  | 3.25488307851278  | -2.59811231626288 |
| O | -0.82138101408699  | 0.54813162275103  | -1.37075072813919 |
| O | 0.85752867176543   | 2.04944551639860  | -1.51729931888010 |
| C | -8.99006963161404  | 2.25689392515312  | -3.11513543785917 |
| C | -8.39008806968889  | 3.48285536581119  | -3.41762554284825 |
| C | -9.19965785081520  | 4.52116452861284  | -3.87690594944321 |
| C | -11.05966538474811 | 3.03566633600597  | -3.68456010720003 |
| C | -6.92706478165247  | 3.71695987630341  | -3.26587240614441 |
| N | -10.29960951901221 | 2.02804697002320  | -3.24268971797831 |
| O | -6.26473335602791  | 2.64957880281236  | -2.82531960824810 |
| H | -0.07472054442874  | -0.00359634171931 | -1.08939323759222 |
| H | -5.27994034673856  | 2.88381138894036  | -2.74565543379950 |
| H | -3.03788663463111  | 1.38021867739383  | -1.96203196360244 |
| H | 0.06911005761403   | 4.32386650865486  | -2.30596885827758 |
| H | -1.69191399560703  | 5.96307349355706  | -3.06465411691422 |
| H | -4.07239670757573  | 5.16401272233134  | -3.22110558163542 |
| H | -8.38210249819262  | 1.43007253867767  | -2.75495088255193 |
| H | -12.12477072699487 | 2.82573796548659  | -3.78077964191209 |
| H | -11.22725429630601 | 5.07309385288435  | -4.36744935150555 |



H -8.74659167366554 5.47872957308096 -4.11534285419201

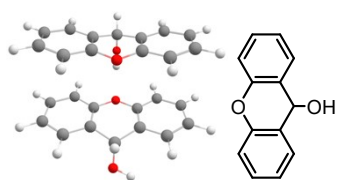

Main article molecule number: 9

Name: Xanthhydrol

Qty of copies of the molecule modelled: 2

Qty of imaginary frequencies: 0

Final single point energy (Eh): -1303.46741017142

|   |                   |                   |                   |
|---|-------------------|-------------------|-------------------|
| C | -3.14072364709137 | -0.74885613291211 | 3.48547428933473  |
| C | -1.93214362701649 | -0.08227500314548 | 3.36550087789258  |
| C | -0.74837653223062 | -0.81611576513377 | 3.36093052051621  |
| C | -0.74821376852985 | -2.20319820987611 | 3.48191388333136  |
| C | -1.98252345361588 | -2.85255690347608 | 3.57486679574507  |
| C | -3.17261789696799 | -2.14010423708826 | 3.58318571024214  |
| C | 0.53700057623804  | -2.96694611173558 | 3.61228283054632  |
| C | 1.71301545801404  | -2.14185778602593 | 3.18786768671134  |
| C | 1.60935200350473  | -0.76059778411021 | 3.06285514802684  |
| C | 2.71520051693115  | 0.03312665128705  | 2.77080346968928  |
| H | 2.58936538164514  | 1.10625726525980  | 2.66587780199435  |
| C | 3.95072514101886  | -0.56980213564321 | 2.60049983443852  |
| C | 4.08178954688237  | -1.95408734673375 | 2.71252927154407  |
| C | 2.96724370917775  | -2.72609630981439 | 3.00307187238301  |
| H | -4.06509049867697 | -0.17965612681586 | 3.47991477325395  |
| H | -1.88948681217963 | 0.99695713351908  | 3.25594606447800  |
| H | -1.99803257002361 | -3.93939856883625 | 3.64380447425146  |
| H | -4.12139903996956 | -2.66230415091203 | 3.65568691075122  |
| H | 4.81406562280221  | 0.04452515927728  | 2.36402787474326  |
| H | 5.05033893588824  | -2.42433070980710 | 2.57472794493896  |
| H | 3.05762312590708  | -3.80378460720459 | 3.11404471932091  |
| O | 0.41063547243361  | -0.09069502301938 | 3.20661073922659  |
| O | 0.77857208388737  | -3.33329796818990 | 4.99374041508418  |
| H | -0.06052302008707 | -3.63265530003321 | 5.36585933775269  |
| H | 0.48636496749086  | -3.88744112726619 | 3.00622771090034  |
| C | 3.50611814726075  | -0.88976343689239 | -0.81445397455442 |
| C | 2.32166125923629  | -1.53133670467691 | -0.49496983912349 |
| C | 1.17132047100929  | -0.77340776262256 | -0.28515911824310 |
| C | 1.18677564175990  | 0.61734058261521  | -0.37913934724557 |
| C | 2.39424215956035  | 1.23950728792910  | -0.70752364724439 |
| C | 3.54687454922789  | 0.50138047581302  | -0.92734471222215 |
| C | -0.03965897798572 | 1.42953597644723  | -0.06704061837934 |
| C | -1.26938874826602 | 0.56384389574359  | -0.07097983872326 |
| C | -1.17172092076298 | -0.82480010719416 | 0.00615069188305  |
| C | -2.30560034879031 | -1.63195346317988 | 0.07680557906501  |
| H | -2.18132051497464 | -2.70776670108761 | 0.14591629773869  |
| C | -3.55868030789313 | -1.04316826689893 | 0.06217916610025  |
| C | -3.68504884221929 | 0.34465061252436  | -0.02420622236349 |
| C | -2.54588347503405 | 1.13217143769836  | -0.08766313093585 |
| H | 4.40487632033769  | -1.47753538394760 | -0.97638581304625 |
| H | 2.26546237216478  | -2.61060702349592 | -0.39767563506711 |
| H | 2.41384826624517  | 2.32476598895472  | -0.77430115024981 |
| H | 4.47511920575090  | 1.00223004639145  | -1.18433863926481 |
| H | -4.44389389220864 | -1.67004780323557 | 0.11777020591264  |
| H | -4.66834673761888 | 0.80437138730981  | -0.04245051462056 |
| H | -2.62753463165588 | 2.21537796501794  | -0.13930456457189 |
| O | 0.03313500029724  | -1.48361959645228 | 0.01207635757258  |
| O | 0.10170617483927  | 2.13668555541190  | 1.18275822223188  |
| H | 0.20837808032991  | 1.46655883840448  | 1.87576946484687  |
| H | -0.15074392604229 | 2.23284829785881  | -0.80677117659288 |

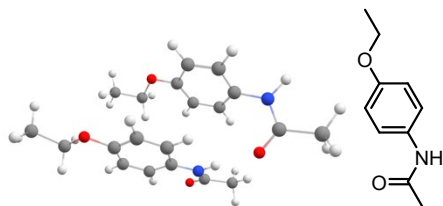

Main article molecule number: 10

Name: Phenacetin

Qty of copies of the molecule modelled: 2

Qty of imaginary frequencies: 0

Final single point energy (Eh): -1187.98250256548

|   |                   |                   |                   |
|---|-------------------|-------------------|-------------------|
| C | 1.61270133690748  | 1.22189727766279  | -3.25126991339474 |
| C | 1.50960448131933  | 0.72115292497353  | -1.94415349021276 |
| C | 2.84570832060955  | 1.41440201891436  | -3.84409234332266 |
| H | 0.70834572719137  | 1.48538361083367  | -3.79559716533134 |
| C | 2.68052996665882  | 0.40283280381074  | -1.25353795278419 |
| N | 0.21639616923067  | 0.57271125437691  | -1.41078186703414 |
| C | 4.01762699591034  | 1.10614208577409  | -3.14691981503592 |
| H | 2.92113858955651  | 1.81912332909000  | -4.84839732523553 |
| C | 3.92606557619807  | 0.59347376553405  | -1.85395622152481 |
| H | 2.61953941991568  | 0.01565637004037  | -0.24587050643942 |
| C | -0.12916168421283 | 0.34831740406292  | -0.10338106572482 |
| H | -0.54636182399791 | 0.78361788410559  | -2.04840971728661 |
| O | 5.18897596079543  | 1.35153704041753  | -3.81085931454523 |
| H | 4.81339907002097  | 0.33470112606159  | -1.28765908153843 |
| C | -1.62297579996014 | 0.29410682983367  | 0.15271492237174  |
| O | 0.67594476485642  | 0.19463822263810  | 0.80781942110753  |
| C | 6.41111884046577  | 1.03716747042156  | -3.13958277855878 |
| H | -1.86904850742011 | 1.04705903260002  | 0.90793421645451  |
| H | -2.23297993005847 | 0.45091617648337  | -0.73992274482510 |
| H | -1.85724790584114 | -0.68239704840171 | 0.58709614628423  |
| C | 7.54547240333833  | 1.41842747512625  | -4.06480442542429 |
| H | 6.47228997808695  | 1.59819117942101  | -2.19376172289256 |
| H | 6.43891193122129  | -0.03723044806470 | -2.90100663663969 |
| H | 7.51400929960003  | 2.48806824657825  | -4.29225725306820 |
| H | 8.50557247717177  | 1.19140879505202  | -3.59122705582020 |
| H | 7.48049237131065  | 0.86248518008997  | -5.00443832616215 |
| C | 4.94624384007090  | 4.48225093402730  | -1.75658889323874 |
| C | 3.46352811841813  | 4.33095670233407  | -1.50492777833902 |
| H | 5.23736024619814  | 3.91047862066305  | -2.64328811339489 |
| H | 5.50505529005464  | 4.10353688487865  | -0.89473371186614 |
| H | 5.21381363609940  | 5.53188997998766  | -1.91074113247194 |
| O | 2.78272407298702  | 4.83925286850397  | -2.66591733778284 |
| H | 3.19963353792027  | 3.27429068843799  | -1.36209508900347 |
| H | 3.14888355631827  | 4.89879046605079  | -0.61638612781838 |
| C | 1.46425840185400  | 4.55486604947681  | -2.79871264024375 |
| C | 0.66450155775858  | 4.01885113434436  | -1.78524124174478 |
| C | 0.91019438399468  | 4.80832851709136  | -4.05834186554063 |
| C | -0.66128667226019 | 3.69928224745437  | -2.05143522941416 |
| H | 1.06590909370795  | 3.81832437827423  | -0.79889907546489 |
| C | -0.40479386018233 | 4.46513056196356  | -4.32030361920217 |
| H | 1.54393305545719  | 5.23126464476441  | -4.83113349394792 |
| C | -1.19331533472304 | 3.89305471749520  | -3.32062774036309 |
| H | -1.27901824704452 | 3.26906053426934  | -1.26950345111353 |
| H | -0.81606944302417 | 4.61431345043895  | -5.31549562931018 |
| N | -2.52866748493699 | 3.49051268430114  | -3.61308055889095 |
| C | -2.98373257543695 | 2.21239774396156  | -3.46585835769084 |
| H | -3.13506916443948 | 4.15611117914311  | -4.06644869147221 |
| C | -4.42182884969503 | 1.97904264063156  | -3.86988371910545 |
| O | -2.29186321216739 | 1.29701426631723  | -3.02719501884311 |
| H | -4.44842694115131 | 1.15999630796282  | -4.59340492180259 |
| H | -4.91360164580876 | 2.85745518764097  | -4.29622942708719 |
| H | -4.98050338884404 | 1.65217660214911  | -2.98787511826311 |

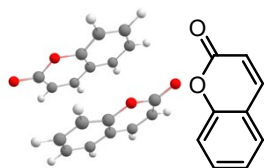

Main article molecule number: **11**

Name: -993.883543951551

Qty of copies of the molecule modelled: 2

Qty of imaginary frequencies: 0

Final single point energy (Eh):

|   |                   |                   |                   |
|---|-------------------|-------------------|-------------------|
| O | -0.04772284023907 | -1.30566853911111 | -3.25756047151263 |
| O | -0.15736107692497 | -2.06669659384363 | -1.16354436938556 |
| H | -0.93822447200873 | 0.09923796687487  | -5.20613071446452 |
| O | 0.59988855387132  | 2.61954693938241  | -4.32684820836740 |
| O | 0.97546599919684  | 3.14801677801348  | -6.46018792335119 |
| H | -0.90709593780863 | 2.49530323644956  | -2.25969205342262 |
| C | 0.57664752742296  | -1.22292401360447 | -4.46539805463053 |
| C | 2.32629629402660  | -2.69419752005861 | -3.65327325597248 |
| C | -0.01996466089352 | -0.42944586336219 | -5.43987675198879 |
| C | 1.77672047431559  | -1.90988508308211 | -4.71743731758737 |
| C | 2.36407323722935  | -1.78981806326278 | -5.98740217539219 |
| C | 0.46568321323555  | -2.05791113695437 | -2.19661489441952 |
| C | 1.70775696203782  | -2.76133805770979 | -2.45476687779348 |
| C | 0.58553228116340  | -0.32328470469758 | -6.68316910256057 |
| C | 1.77507514157772  | -1.00607385275950 | -6.96200287584185 |
| H | 2.09600772420678  | -3.34477151345232 | -1.62769778674841 |
| H | 0.13426598202597  | 0.31066253477397  | -7.44006648449696 |
| H | 2.23537443401457  | -0.91310932413631 | -7.94033023615861 |
| H | 3.25358761214472  | -3.23622705791370 | -3.82763945584543 |
| H | 3.28947921583036  | -2.32340498579863 | -6.18969042760260 |
| C | 0.96748409516065  | 2.00008545128128  | -3.16808886928854 |
| C | 3.09084579250067  | 1.39901168572549  | -4.17537169873223 |
| C | 0.05134669742920  | 2.00597442372024  | -2.12210981050455 |
| C | 2.21460505874525  | 1.36639801989551  | -3.04360329556652 |
| C | 2.52634457123879  | 0.73361318880475  | -1.82889358866005 |
| C | 1.41542351870460  | 2.62997108213046  | -5.46200464599416 |
| C | 2.71665077261337  | 2.00723159924061  | -5.32089237132251 |
| C | 0.38246878403898  | 1.36729775690257  | -0.93706406842631 |
| C | 1.61988053504923  | 0.73336817978228  | -0.78502956011450 |
| H | 3.34960979521482  | 2.03937657719126  | -6.20002806581898 |
| H | -0.33570300555867 | 1.34644403669069  | -0.12375638449687 |
| H | 1.85538666695514  | 0.22508465855306  | 0.14396738730386  |
| H | 4.06329188354133  | 0.91713757391451  | -4.09767681520179 |
| H | 3.48856916994161  | 0.23790462042011  | -1.72808877563300 |

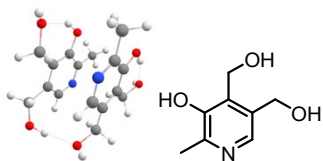

Main article molecule number: **12**

Name: Pyridoxine

Qty of copies of the molecule modelled: 2

Qty of imaginary frequencies: 0

Final single point energy (Eh): -1183.58286832443

|   |                   |                   |                   |
|---|-------------------|-------------------|-------------------|
| N | -3.93631146687735 | -2.14546602556160 | -0.12808367331925 |
| C | -2.89480456905776 | -2.57903317796810 | -2.69792769316578 |
| C | -2.17537706864446 | -1.87333333132334 | -1.72927112706991 |
| C | -2.73534589002683 | -1.67225326465303 | -0.45257446501483 |
| C | -4.62742622507160 | -2.82841512093701 | -1.05320977226127 |
| C | -4.16878450127788 | -3.05550218170964 | -2.34271016445823 |

|   |                    |                   |                   |
|---|--------------------|-------------------|-------------------|
| C | -2.41685729522273  | -2.77479192121181 | -4.11388904173517 |
| C | -5.04659716811544  | -3.75835249488457 | -3.35959861023272 |
| C | -1.97002392858908  | -0.88809446974912 | 0.57102467514352  |
| O | -0.95166804422157  | -1.32232482632227 | -1.93704526003644 |
| O | -0.98294860132456  | -2.63189567644792 | -4.21190931370637 |
| O | -6.39000294159154  | -3.91980525431291 | -2.94994890528902 |
| H | -0.65211510329741  | -1.61498660385683 | -2.81995670152384 |
| H | -0.77077193397982  | -2.36337425827883 | -5.11171580867473 |
| H | -6.78144141162483  | -3.03296713640600 | -2.88315481349777 |
| H | -2.91237820795194  | -2.03008024292411 | -4.75689884474491 |
| H | -2.69258757113692  | -3.77851009654802 | -4.46623246272930 |
| H | -4.66005548019969  | -4.76986540688629 | -3.55115339781424 |
| H | -4.99575787219460  | -3.21418607834351 | -4.31972500542170 |
| H | -1.72137196882646  | 0.11129735274836  | 0.19429152459661  |
| H | -2.56153268166979  | -0.81180386581214 | 1.48638742493023  |
| H | -1.01439967945732  | -1.37211903552775 | 0.80242776290396  |
| N | -3.80566567028876  | 0.29228824088542  | -4.41760041135129 |
| C | -4.457221222902759 | 0.97234469062825  | -1.77351135100699 |
| C | -3.24719256871377  | 1.36686498265429  | -2.35157405931082 |
| C | -2.95548043476050  | 1.00335392387870  | -3.68290154543460 |
| C | -4.96998824627867  | -0.08283114490070 | -3.86931112420285 |
| C | -5.34286298522741  | 0.22393279539878  | -2.57009314532195 |
| C | -4.82472360947212  | 1.21581226322125  | -0.33176591376606 |
| C | -6.65880535053613  | -0.24734481690578 | -1.99574838387560 |
| C | -1.64423998871607  | 1.40704370491340  | -4.28383341937331 |
| O | -2.28977249299111  | 2.07886212299779  | -1.70793213214913 |
| O | -4.01850560965108  | 2.25287441139090  | 0.26356247083320  |
| O | -7.37914511387928  | -1.14774350676676 | -2.83832898612927 |
| H | -2.64593064752269  | 2.31235859389564  | -0.82861561656893 |
| H | -3.90963259085514  | 2.05030347988559  | 1.19831520001000  |
| H | -7.68503018534857  | -0.67011442166051 | -3.61771297685539 |
| H | -5.88097324228453  | 1.51399017617642  | -0.26041652518190 |
| H | -4.70311632868335  | 0.27015166461950  | 0.22082902060915  |
| H | -6.48169952635121  | -0.80391394264870 | -1.06764794537006 |
| H | -7.29626421202155  | 0.61586253265966  | -1.74198105658625 |
| H | -5.59983578343738  | -3.21194977073857 | -0.75419907483985 |
| H | -5.61917851434175  | -0.68588973733494 | -4.50046720114456 |
| H | -1.53555759588429  | 2.49743444031629  | -4.29384520580292 |
| H | -1.58034086939347  | 1.02861484052830  | -5.30585536360294 |
| H | -0.81114759397280  | 1.01933759382242  | -3.68655158045576 |

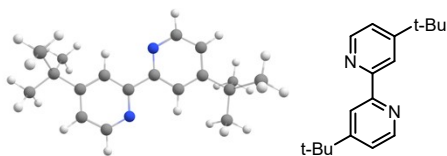

Main article molecule number: **1-monomer (Fig. S1)**

Name: 4,4'-di-t-butyl-2,2'-bipyridine

Qty of copies of the molecule modelled: 1

Qty of imaginary frequencies: 0

Final single point energy (Eh): -809.684916603281

|   |                   |                   |                   |
|---|-------------------|-------------------|-------------------|
| N | 1.88568777204077  | 11.16674325459677 | 30.09362165116610 |
| N | 3.13137675777119  | 14.54722965174118 | 30.31045755615307 |
| C | 1.11646144034744  | 10.33467894347100 | 30.79752184589665 |
| H | 0.96680994578943  | 9.34270815102191  | 30.37097169714069 |
| C | 0.52049989003213  | 10.66662319665950 | 32.00553645771851 |
| H | -0.09195624018654 | 9.92802184990462  | 32.51401017886221 |
| C | 0.71977082317072  | 11.94331441436106 | 32.54457579716895 |
| C | 1.52149921372921  | 12.81150355398342 | 31.81090385466650 |
| H | 1.73495226785471  | 13.81875320372122 | 32.14365303362268 |
| C | 2.08322538152808  | 12.39240686113806 | 30.59902025205684 |
| C | 2.94087902690333  | 13.31428038292739 | 29.80898853112479 |
| C | 3.51075025716888  | 12.89703223394663 | 28.60661761069812 |
| H | 3.30626370256081  | 11.88639509291513 | 28.27259282162241 |
| C | 4.31565326423896  | 13.76659335242277 | 27.86962098130160 |
| C | 4.50571537532551  | 15.04319808138093 | 28.39959499219610 |
| H | 5.11513879968868  | 15.78478513143355 | 27.89562935235732 |

|   |                   |                   |                   |
|---|-------------------|-------------------|-------------------|
| C | 3.89783014667104  | 15.37622320221315 | 29.60760455783595 |
| H | 4.04101612012284  | 16.37174442983880 | 30.02871783862115 |
| C | 0.07350399571924  | 12.33047453915944 | 33.87283823261480 |
| C | -1.45699171823782 | 12.21581256846757 | 33.73836724819395 |
| H | -1.76895746711460 | 11.19396520080117 | 33.50156682504579 |
| H | -1.82714974529043 | 12.87515636343996 | 32.94615919755229 |
| H | -1.93797607596896 | 12.50480295345621 | 34.67971309891372 |
| C | 0.56646840695189  | 11.36870230572828 | 34.97075560302318 |
| H | 0.11748666259253  | 11.63730862879424 | 35.93371063421596 |
| H | 1.65565221144579  | 11.42135938332619 | 35.07208760641943 |
| H | 0.29684604939891  | 10.33103454101757 | 34.75222136918677 |
| C | 0.41970199085348  | 13.76401971892045 | 34.28970406032006 |
| H | -0.06555419713981 | 13.99186632646364 | 35.24448452222252 |
| H | 0.06976062559195  | 14.49562523769331 | 33.55389733394048 |
| H | 1.49844018158763  | 13.89765264533583 | 34.42288810086836 |
| C | 4.93819677999229  | 13.30134351105260 | 26.55503481350575 |
| C | 3.81382567016349  | 12.89583685964068 | 25.58290479420128 |
| H | 4.24378968044583  | 12.56294879953289 | 24.63139558520259 |
| H | 3.14870488178647  | 13.74268705939215 | 25.38284530151198 |
| H | 3.20886707088805  | 12.07792225428610 | 25.98481679969767 |
| C | 5.78378773609320  | 14.39506981759877 | 25.89340767433956 |
| H | 5.18476900981330  | 15.27906081812110 | 25.64885275983937 |
| H | 6.20657816431955  | 14.01243169517558 | 24.95870558116443 |
| C | 5.84041260322194  | 12.08352716423535 | 26.83147624626770 |
| H | 6.63870826668293  | 12.34288209392103 | 27.53501674431938 |
| H | 6.30074588752304  | 11.73927692583915 | 25.89837322000671 |
| H | 5.27304922583962  | 11.25026763986406 | 27.25622743423041 |
| H | 6.61847815808323  | 14.70573596105939 | 26.53134520298594 |

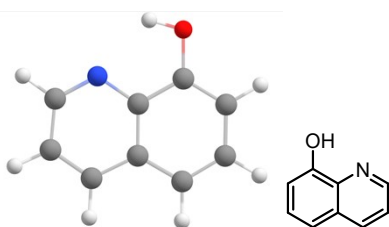

Main article molecule number: **2-monomer (Fig. S1)**

Name: 8-Hydroxyquinoline

Qty of copies of the molecule modelled: 1

Qty of imaginary frequencies: 0

Final single point energy (Eh): -477.062939536696

|   |                   |                   |                  |
|---|-------------------|-------------------|------------------|
| N | 13.28273251818368 | 12.89134518786673 | 6.81453593511704 |
| C | 12.88796292487632 | 11.77263669800358 | 6.23976153215404 |
| H | 11.82874975959226 | 11.69346873295383 | 5.99674801425905 |
| C | 13.76338037725167 | 10.70807186846512 | 5.93812772293519 |
| H | 13.37534977168863 | 9.81223825785397  | 5.46351165881848 |
| C | 15.09534853718796 | 10.82592476010156 | 6.25193487010557 |
| H | 15.79509237615529 | 10.02317331343906 | 6.03206176811675 |
| C | 15.56660318346466 | 12.00606969872075 | 6.86914579661136 |
| C | 16.91428471531573 | 12.23005566299348 | 7.23298180543166 |
| H | 17.65665884626875 | 11.46180641193926 | 7.03703138114179 |
| C | 17.26534513916389 | 13.41912709825106 | 7.83002420662259 |
| H | 18.29992310181257 | 13.59455866773187 | 8.11070998894915 |
| C | 16.31746452665328 | 14.42764603867114 | 8.09250426970810 |
| H | 16.61287519601881 | 15.35922862513564 | 8.56428849956642 |
| C | 14.99740583726187 | 14.23506891447989 | 7.74812824599277 |
| C | 14.59653284865878 | 13.01604208042150 | 7.12778320936030 |
| O | 14.06831940262102 | 15.18354852363401 | 7.98716160405841 |
| H | 13.22673793782474 | 14.81502245933745 | 7.65903849105128 |

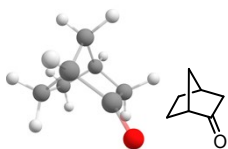

Main article molecule number: **3-monomer (Fig. S1)**

Name: Norcamphor

Qty of copies of the molecule modelled: 1

Qty of imaginary frequencies: 0

Final single point energy (Eh): -347.90373088891

|   |                   |                   |                   |
|---|-------------------|-------------------|-------------------|
| C | 0.51870075833866  | 1.29505445825362  | -0.39453768030950 |
| C | -0.92495754788521 | 1.03465627530763  | 0.06874340929238  |
| C | 0.16998631877058  | -0.86668377367787 | 0.67221755402151  |
| H | 0.63446672574232  | 1.52602421493894  | -1.45873785428489 |
| H | 0.98874215009472  | 2.10681631694529  | 0.17623588216690  |
| C | -0.68192747819300 | 0.21885058138186  | 1.35761727774680  |
| H | -1.60425147289126 | -0.18029607841652 | 1.79359695772752  |
| H | -0.13335838333374 | 0.77811974679659  | 2.12405322993522  |
| C | -1.54476652979802 | -0.02942049494759 | -0.86051306452276 |
| H | -2.61909149340622 | -0.12780003296198 | -0.67425340420700 |
| H | -1.41548619400753 | 0.22645172733154  | -1.91704818604160 |
| C | -0.78552798816491 | -1.33231136760998 | -0.46420849389997 |
| H | -1.46987902877844 | -2.09086154918258 | -0.07089112933918 |
| H | -0.23850489554132 | -1.78141582776017 | -1.29874451835571 |
| H | -1.52971544171501 | 1.93794202824448  | 0.18442672175257  |
| H | 0.58922445002852  | -1.67139131947136 | 1.27810791781572  |
| C | 1.21922865676530  | -0.02172300186194 | -0.03658934359973 |
| O | 2.35938939397456  | -0.32670290330998 | -0.29600427589827 |

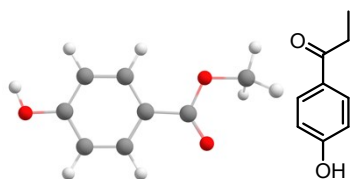

Main article molecule number: **4-monomer (Fig. S1)**

Name: Methylparaben

Qty of copies of the molecule modelled: 1

Qty of imaginary frequencies: 0

Final single point energy (Eh): -535.260594271769

|   |                   |                   |                   |
|---|-------------------|-------------------|-------------------|
| H | 17.90956636744076 | 9.49520852034183  | 15.05194227324298 |
| O | 14.11359178570963 | 14.35951895448102 | 18.15453291883977 |
| C | 15.29982396222303 | 12.88842516475296 | 16.69508811926987 |
| O | 14.01980065765853 | 14.70933454155191 | 15.92420649358539 |
| C | 15.79538791774179 | 12.10938325357829 | 17.74775242469777 |
| H | 15.52458070990070 | 12.37821143059897 | 18.76380394183927 |
| O | 17.75225890092073 | 9.61646460641000  | 15.99572165055156 |
| C | 16.61171993923992 | 11.02127791525273 | 17.50142409149296 |
| H | 17.00097942967662 | 10.41153180217309 | 18.31024556774631 |
| C | 16.94534317713782 | 10.69673440440707 | 16.18448806283508 |
| C | 16.45865845781015 | 11.46442350961071 | 15.12378400008806 |
| H | 16.72104077225615 | 11.20799866636236 | 14.09942029000077 |
| C | 15.64060348039528 | 12.55382978507080 | 15.38097209560105 |
| H | 15.26257231155943 | 13.14984960253397 | 14.55802741244321 |
| C | 14.43210409175771 | 14.03783018266603 | 17.02828402302531 |
| C | 13.16916803118794 | 15.84030926258792 | 16.19082516599598 |
| H | 13.69105671515362 | 16.57464225502608 | 16.81107310584027 |
| H | 12.92965405531146 | 16.26193489754682 | 15.21401364361216 |
| H | 12.25929123691867 | 15.52216824504740 | 16.70778971929216 |

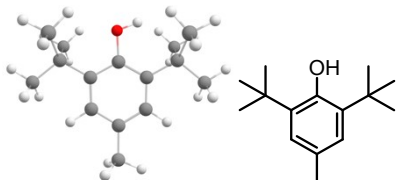

Main article molecule number: **5-monomer (Fig. S1)**

Name: BHT

Qty of copies of the molecule modelled: 1

Qty of imaginary frequencies: 0

Final single point energy (Eh): -661.112433195317

|   |                   |                   |                   |
|---|-------------------|-------------------|-------------------|
| C | -1.24580697041107 | 0.16367639212499  | -0.00010679246717 |
| C | -1.20445657270553 | 1.55572807191057  | -0.00080453667946 |
| C | -0.00985039341904 | 2.27259016392019  | -0.00075109008396 |
| C | 1.18305863314632  | 1.56310712060862  | -0.00051425780852 |
| C | 1.22515379757971  | 0.16510136146893  | 0.00006135233277  |
| C | -0.00813938501000 | -0.51590265040974 | 0.00038746024206  |
| H | -2.13243026275766 | 2.11709736619285  | -0.00141187601352 |
| H | 2.10827114191947  | 2.12734891388937  | -0.00088655887750 |
| C | -2.58478851805513 | -0.59012214578974 | -0.00016155038682 |
| C | -3.78141274150315 | 0.37394490401115  | -0.00072402829036 |
| H | -3.79673105366340 | 1.01194586801863  | -0.89117998372294 |
| H | -4.70578950382877 | -0.21305410654552 | -0.00063482976622 |
| H | -3.79699096132860 | 1.01264937662691  | 0.88922172453737  |
| C | -2.71039817027253 | -1.46186402053977 | 1.26667841548347  |
| H | -3.69125374659148 | -1.95161492115767 | 1.28178816285126  |
| H | -1.94095836292128 | -2.23303220365891 | 1.30996995030626  |
| H | -2.62777945721709 | -0.83942644327613 | 2.16463068367479  |
| C | -2.70990469511365 | -1.46279017430281 | -1.26640931562124 |
| H | -1.94047832011909 | -2.23401794346405 | -1.30877472954036 |
| H | -3.69077836794434 | -1.95250209370662 | -1.28158382119159 |
| H | -2.62685739877959 | -0.84101625296335 | -2.16478082688006 |
| C | 2.57448960809506  | -0.57764373899925 | -0.00004335069709 |
| C | 2.73615390451046  | -1.43536585796644 | -1.27751985814350 |
| H | 3.71786682973408  | -1.92245990438262 | -1.27644844771343 |
| H | 1.98627383110858  | -2.22273776043111 | -1.40643084408553 |
| H | 2.67057015643334  | -0.79517305642866 | -2.16300707915255 |
| C | 2.73679960853744  | -1.43457133322580 | 1.27788150356787  |
| H | 3.71849433208275  | -1.92170037172939 | 1.27658494679014  |
| H | 2.67170902593086  | -0.79383526282969 | 2.16301187738396  |
| H | 1.98698397041816  | -2.22185804060822 | 1.40770813451686  |
| C | 3.76329312852984  | 0.39813519703836  | -0.00062731780060 |
| H | 3.76802284799562  | 1.03578820408186  | -0.89038394825499 |
| H | 3.76841112603178  | 1.03639470843287  | 0.88869193243740  |
| H | 4.69505916181898  | -0.17718070525539 | -0.00064146964117 |
| C | -0.02384654889226 | 3.77827937431575  | 0.00100286349741  |
| H | -0.52331892965077 | 4.17086081663782  | 0.89444940484081  |
| H | 0.99109960509531  | 4.18508413952823  | -0.01999317487595 |
| H | -0.56100126492576 | 4.17270695685432  | -0.86929022927566 |
| O | -0.06978880473339 | -1.89015857978773 | 0.00085911355679  |
| H | 0.82390672087584  | -2.24243836820282 | 0.00110139095097  |

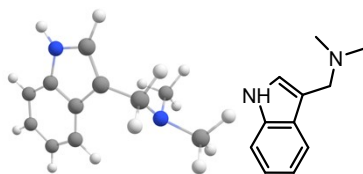

Main article molecule number: **6-monomer (Fig. S1)**

Name: Gramine

Qty of copies of the molecule modelled: 1

Qty of imaginary frequencies: 0

Final single point energy (Eh): -536.954162247783

|   |                   |                   |                   |
|---|-------------------|-------------------|-------------------|
| H | 10.59285936876690 | 14.19369082595759 | 13.31151605810053 |
| H | 10.72981204261871 | 16.03919265252571 | 11.16627002253114 |
| H | 10.47438549576812 | 17.42908906350500 | 16.60786037656080 |
| H | 10.74350828643377 | 18.60775540014236 | 17.90808065233962 |
| N | 11.11166600387260 | 14.92202888045987 | 13.76949747693277 |
| N | 12.47378915506655 | 17.64804989739854 | 17.21522120313990 |
| C | 11.56211514764697 | 14.88203878976847 | 15.07526006149389 |
| C | 12.24476573423588 | 16.03359673700090 | 15.36690940371926 |
| C | 12.71720151345687 | 18.10824839887639 | 13.85654792634735 |
| C | 12.50769121969003 | 18.60222890775338 | 12.57877405692853 |
| C | 11.79821275293730 | 17.86124628110738 | 11.61698141210320 |

|   |                   |                   |                   |
|---|-------------------|-------------------|-------------------|
| C | 11.28067657132078 | 16.60805518367982 | 11.91038802236325 |
| C | 11.49626362108889 | 16.11346945184651 | 13.19485609914137 |
| C | 12.21328285057136 | 16.84148334215299 | 14.17972411980827 |
| C | 12.91697029839091 | 16.36410163433528 | 16.65724687434695 |
| C | 13.24757003500001 | 17.96946427211195 | 18.40845282786870 |
| C | 11.04647885736318 | 17.62996806457759 | 17.51867376036748 |
| H | 11.36306528767385 | 14.02395938469365 | 15.70350985115468 |
| H | 13.24704416033834 | 18.68801345656849 | 14.60597342464837 |
| H | 12.89191728505301 | 19.58245647342229 | 12.31245726226900 |
| H | 11.64906614143388 | 18.27886388916488 | 10.62563708312026 |
| H | 14.00327308961579 | 16.43863583081911 | 16.49889609838060 |
| H | 12.75639904391386 | 15.52920438634463 | 17.37444279345797 |
| H | 10.78083120595422 | 16.85957657331297 | 18.27232963040199 |
| H | 12.94264016609086 | 18.94751560730103 | 18.79617108129209 |
| H | 14.31396831841748 | 18.01872305377206 | 18.16036866867697 |
| H | 13.11809834727978 | 17.22414456140104 | 19.22044275250493 |

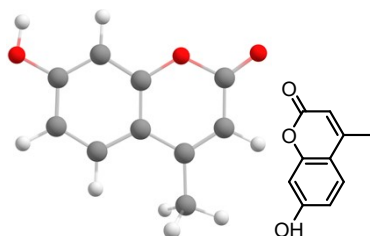

Main article molecule number: **7-monomer (Fig. S1)**

Name: Hymecromone

Qty of copies of the molecule modelled: 1

Qty of imaginary frequencies: 0

Final single point energy (Eh): -611.466363427428

|   |                  |                   |                   |
|---|------------------|-------------------|-------------------|
| O | 2.15904000166639 | 4.98358053503154  | 10.16201776117718 |
| O | 1.52962202350872 | 4.68939004107549  | 12.28165391202642 |
| O | 3.35407198238391 | 5.74405832116977  | 5.63455965849819  |
| H | 2.62391083365637 | 6.37052162932369  | 5.70426546463256  |
| C | 2.29672614231088 | 4.35596432819246  | 11.41265056857904 |
| C | 3.34929524840374 | 3.374597648885549 | 11.51709201556346 |
| H | 3.44251353947056 | 2.90028670022390  | 12.48803996590587 |
| C | 4.17133113444605 | 3.05589277477603  | 10.48449394972899 |
| C | 3.99322740183861 | 3.72441354800663  | 9.21975704727955  |
| C | 4.77619833438181 | 3.48604151865611  | 8.07608055578131  |
| C | 4.55516942596771 | 4.16092387082156  | 6.89396279683675  |
| H | 5.16012787437482 | 3.97567394109072  | 6.01325353799980  |
| C | 3.52556046251992 | 5.10970813614529  | 6.82541104524383  |
| C | 2.72884615683932 | 5.37490420702534  | 7.93272918589494  |
| H | 1.92513862159772 | 6.10538684615882  | 7.90343961621565  |
| C | 2.96906839015190 | 4.68265655447368  | 9.11442863931636  |
| C | 5.24919539552224 | 2.02829425781663  | 10.64450782912898 |
| H | 5.10795789610106 | 1.20202909064208  | 9.93819332617419  |
| H | 5.57514440932554 | 2.75305841924532  | 8.12163853129429  |
| H | 6.23526708871745 | 2.46258533622647  | 10.44325151396402 |
| H | 5.25170963681528 | 1.62030729504294  | 11.65688107875857 |

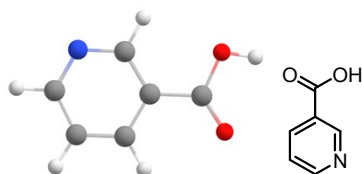

Main article molecule number: **8-monomer (Fig. S1)**

Name: Nicotinic acid

Qty of copies of the molecule modelled: 1

Qty of imaginary frequencies: 0



Final single point energy (Eh): -436.786352736965

|   |                  |                   |                  |
|---|------------------|-------------------|------------------|
| O | 7.38050596456261 | 11.45004572001977 | 4.54484546818390 |
| C | 4.96111726017770 | 14.89932575258003 | 4.18785695474100 |
| C | 7.62232553976778 | 15.08140517710174 | 4.74823406123930 |
| C | 7.05504565788738 | 13.81460162924352 | 4.57693781661914 |
| C | 5.69222280367489 | 13.72755297283969 | 4.29030335462650 |
| C | 5.61960247036313 | 16.11270161974874 | 4.37570814911084 |
| C | 7.83928889201111 | 12.56188872523937 | 4.68636818380568 |
| N | 6.92417580462425 | 16.21451025657821 | 4.65105502953557 |
| O | 9.14796314470295 | 12.78587293157785 | 4.96621562813345 |
| H | 9.56830633267468 | 11.91323568791007 | 5.01653571989991 |
| H | 8.68213185003068 | 15.18059648157923 | 4.97231512282394 |
| H | 5.07188367534410 | 17.05177810899120 | 4.30147839266988 |
| H | 3.89862430942547 | 14.88050502230856 | 3.96636983338080 |
| H | 5.23927329475322 | 12.75005891428193 | 4.15498228523006 |

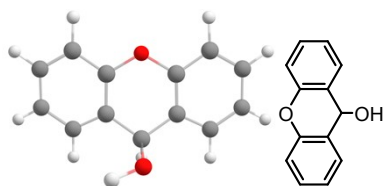

Main article molecule number: **9-monomer (Fig. S1)**

Name: Xanthinol

Qty of copies of the molecule modelled: 1

Qty of imaginary frequencies: 0

Final single point energy (Eh): -651.722430671294

|   |                   |                   |                   |
|---|-------------------|-------------------|-------------------|
| C | 3.54478826820433  | -0.99820354766330 | -0.11966261171163 |
| C | 2.32559935481289  | -1.59562997414977 | 0.16402544649925  |
| C | 1.17606394672911  | -0.81038690804122 | 0.20807638815282  |
| C | 1.22929354308719  | 0.56671069832653  | -0.01133990766099 |
| C | 2.46477975955328  | 1.14062640922864  | -0.31939738218251 |
| C | 3.61955180235942  | 0.37182841203638  | -0.37372767831104 |
| C | -0.00121247107381 | 1.40161426227577  | 0.18704144451841  |
| C | -1.23595331744550 | 0.57403097341898  | 0.00388170030116  |
| C | -1.18120173566896 | -0.80412902599834 | 0.20483913671649  |
| C | -2.32736497139043 | -1.59251188916570 | 0.14746251257621  |
| H | -2.24098114563524 | -2.66222993064053 | 0.30848594449069  |
| C | -3.54769180243458 | -0.99185646834371 | -0.12307084727032 |
| C | -3.62510405713376 | 0.38354698940263  | -0.34476904273375 |
| C | -2.47262508218134 | 1.15386169602819  | -0.27836913966403 |
| H | 4.44207514705633  | -1.60868505687596 | -0.15810307459528 |
| H | 2.24183125787051  | -2.66306009568245 | 0.34134400389428  |
| H | 2.51076215039854  | 2.21055927903382  | -0.51496658914321 |
| H | 4.57221530993776  | 0.83277994170774  | -0.61408966670233 |
| H | -4.44430757978597 | -1.60276261285127 | -0.17078276660576 |
| H | -4.58107094215269 | 0.84931714634219  | -0.56166289985447 |
| H | -2.52054598151108 | 2.22955030409813  | -0.42862661720336 |
| O | -0.00183901450828 | -1.46553277110829 | 0.45556755422721  |
| O | -0.05272696337571 | 1.92030553107120  | 1.53950311821217  |
| H | 0.83674246817270  | 2.22067918470082  | 1.76604870312307  |
| H | -0.00250894388470 | 2.24675545284951  | -0.52093372907309 |

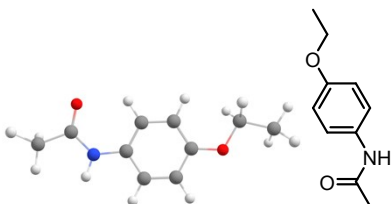

Main article molecule number: **10-monomer (Fig. S1)**

Name: Phenacetin

Qty of copies of the molecule modelled: 1

Qty of imaginary frequencies: 0

Final single point energy (Eh): -593.979783924289

|   |                   |                   |                   |
|---|-------------------|-------------------|-------------------|
| C | 17.74205714886844 | 12.91407312400948 | 14.59261173086514 |
| C | 16.39405072331122 | 12.64977126674120 | 13.95965680654202 |
| H | 17.77985507570187 | 13.92316748360957 | 15.01269818691488 |
| H | 17.92203033972672 | 12.19502421494327 | 15.39770904852145 |
| H | 18.54169147573750 | 12.81558136644415 | 13.85298141208641 |
| O | 16.21369633640752 | 13.61539820748727 | 12.91931594065203 |
| H | 15.58579792643600 | 12.74646253707105 | 14.70075524090359 |
| H | 16.35051886354021 | 11.63494217915780 | 13.53526601877704 |
| C | 15.05740922515344 | 13.56423321221342 | 12.19649699375934 |
| C | 14.02533678619379 | 12.64937520268952 | 12.40250465902209 |
| C | 14.93268959329149 | 14.51672245359415 | 11.18066738362537 |
| C | 12.88029744840581 | 12.67875253508221 | 11.60794555680787 |
| H | 14.08898421397797 | 11.89810604963173 | 13.18093145095160 |
| C | 13.79780891922145 | 14.54555626494458 | 10.39318994978223 |
| H | 15.73835748756083 | 15.22671165220991 | 11.02393170848223 |
| C | 12.75639489145823 | 13.62863370437497 | 10.59404928194543 |
| H | 12.08496429731820 | 11.96577631826251 | 11.77539062376106 |
| H | 13.71804935343379 | 15.29387995312334 | 9.60707607042250  |
| N | 11.63556792613866 | 13.72871046330153 | 9.74287837256709  |
| C | 10.48908710135239 | 12.97292966744049 | 9.73125776779359  |
| H | 11.69121618967087 | 14.45942089548078 | 9.05119585184063  |
| C | 9.48289074874491  | 13.37026331211415 | 8.66739161567248  |
| O | 10.26714547117619 | 12.05168683736181 | 10.50264463354835 |
| H | 8.55179080439371  | 13.65660852049737 | 9.16493649011610  |
| H | 9.80594854775526  | 14.18880917969942 | 8.01774594607100  |
| H | 9.26673310502335  | 12.49118239851413 | 8.05412325856838  |

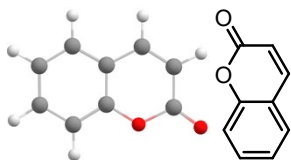

Main article molecule number: **11-monomer (Fig. S1)**

Name: Coumarin

Qty of copies of the molecule modelled: 1

Qty of imaginary frequencies: 0

Final single point energy (Eh): -496.934305122779

|   |                   |                   |                   |
|---|-------------------|-------------------|-------------------|
| O | 11.26467093682450 | 14.63339543011263 | 20.83493012569925 |
| O | 11.83393017688908 | 15.33752907975128 | 18.79539919070798 |
| C | 10.41548855206400 | 13.98174701798808 | 21.67731737076810 |
| C | 8.95999001099150  | 13.47122112870962 | 19.80347074821097 |
| C | 10.76122724031193 | 13.93810123077924 | 23.02444199389168 |
| C | 9.23794392663870  | 13.37742106980483 | 21.20616790753140 |
| C | 8.40585246733131  | 12.72122541603473 | 22.12697946029436 |
| C | 11.02281877766295 | 14.74231455425324 | 19.45876136917057 |
| C | 9.80562920459929  | 14.11842211106650 | 18.97404060124709 |
| C | 9.92061569303537  | 13.28306208970246 | 23.91172589073197 |
| C | 8.74209949135404  | 12.67330911165921 | 23.46760504769515 |
| H | 9.62611183798490  | 14.20807738633700 | 17.90884348911040 |
| H | 10.18452133726485 | 13.24511558888183 | 24.96434233247886 |
| H | 8.09457975413615  | 12.16455965929896 | 24.17424845712779 |
| H | 11.67885053458214 | 14.41619359316512 | 23.35074099630344 |
| H | 8.05291827921928  | 13.01017018720110 | 19.41845390924522 |
| H | 7.49350977910997  | 12.25197234525408 | 21.76790110978564 |

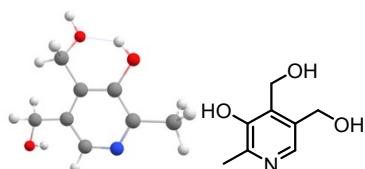

Main article molecule number: **12-monomer (Fig. S1)**

Name: Pyrioxidine

Qty of copies of the molecule modelled: 1

Qty of imaginary frequencies: 0

Final single point energy (Eh): -591.777504554973

|   |                   |                   |                   |
|---|-------------------|-------------------|-------------------|
| N | 28.49391257705194 | 17.36563795917214 | 21.69068063465522 |
| C | 27.61849461937692 | 16.23863251192103 | 24.09486816985234 |
| C | 28.71567045457061 | 17.10244718278753 | 24.04895169607216 |
| C | 29.13247748762625 | 17.65063932213039 | 22.82369978562905 |
| C | 27.42939368913781 | 16.55428694859214 | 21.73008699413924 |
| C | 26.94131733522420 | 15.97023417639186 | 22.89459097170882 |
| C | 27.26641288277820 | 15.56229196712654 | 25.39006764208153 |
| C | 25.71960315790652 | 15.07406587222670 | 22.85250373414311 |
| C | 30.32030913729839 | 18.56217130669764 | 22.77313542317475 |
| O | 29.43895850876515 | 17.42912421823840 | 25.15555912008028 |
| O | 27.21254420769084 | 16.55363766615432 | 26.44293392544186 |
| O | 25.02517635859085 | 15.10266368938966 | 21.61400430866123 |
| H | 28.88619607353478 | 17.24080360780113 | 25.93545453026885 |
| H | 27.11263254498396 | 16.09314386556500 | 27.28416941811806 |
| H | 24.70851665962274 | 16.00272836267202 | 21.47181226776648 |
| H | 26.30491361226536 | 15.04110390848833 | 25.32087088293760 |
| H | 28.04185213082653 | 14.81399209494814 | 25.62526222425294 |
| H | 26.00922028107950 | 14.02470399968556 | 22.99649926860355 |
| H | 25.03921043411453 | 15.33645822918994 | 23.68012422461359 |
| H | 26.94729365087563 | 16.34712524016666 | 20.77793427735948 |
| H | 30.16983234752582 | 19.43581649762378 | 23.41697249922164 |
| H | 30.48189951071828 | 18.88813138109847 | 21.74461158550829 |
| H | 31.22025733843490 | 18.05630299193248 | 23.14078241570973 |

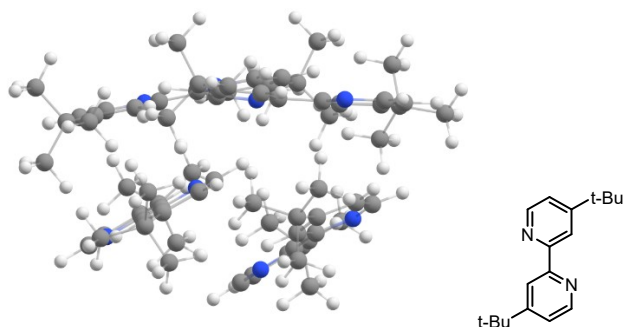

Main article molecule number: **1-tetramer (Fig. S3)**

Name: 4,4'-di-t-butyl-2,2'-bipyridine

Qty of copies of the molecule modelled: 4

Qty of imaginary frequencies: 0

Final single point energy (Eh): -3238.803750464372

|   |                   |                   |                   |
|---|-------------------|-------------------|-------------------|
| C | -0.44501146663687 | -1.86880707826165 | 4.51364832781682  |
| H | -1.21106191093488 | -1.43894509416670 | 3.85935725044641  |
| H | -0.82567884439991 | -1.86481100401742 | 5.54167402556756  |
| H | -0.29368496003424 | -2.91353363918419 | 4.22695196892942  |
| H | -0.13170253403681 | 0.89871500348957  | 4.36038928879017  |
| N | -2.76049176969762 | -0.76169659086299 | 0.37413771377015  |
| N | -0.96114680598033 | 2.03766938360875  | 1.77097447530966  |
| C | -3.73053294060553 | -1.61361109283190 | 0.71447277237706  |
| H | -4.02175815289421 | -2.33226449584509 | -0.05246112142927 |
| C | -4.35166030373144 | -1.60852950918879 | 1.95585220759394  |
| H | -5.13495752419573 | -2.33314865924540 | 2.15723773286191  |
| C | -3.95708945718726 | -0.67745797086857 | 2.92390050045997  |
| C | -2.95363943916612 | 0.21613959971606  | 2.56036249159542  |
| H | -2.59048761455896 | 0.98056114058824  | 3.23518014854695  |
| C | -2.38469319915864 | 0.14766749412700  | 1.28416719831326  |
| C | -1.34570287233019 | 1.12282268604180  | 0.86421963352945  |
| C | -0.83505234065985 | 1.09193224386594  | -0.43318702107794 |

|   |                    |                   |                   |
|---|--------------------|-------------------|-------------------|
| H | -1.19387070450935  | 0.31700974561814  | -1.10030699915116 |
| C | 0.10032912009500   | 2.03867190970264  | -0.84681912917476 |
| C | 0.48832263097137   | 2.98699084409294  | 0.10143066287174  |
| H | 1.21219714020134   | 3.76066895004794  | -0.12959317064100 |
| C | -0.06299708828265  | 2.93789611243234  | 1.37888192236484  |
| H | 0.23937924832027   | 3.67182094137637  | 2.12695136200814  |
| C | -4.62332241679728  | -0.65954019701283 | 4.29798897014091  |
| C | -6.11615630571613  | -0.32193893623419 | 4.12097422857344  |
| H | -6.62266291573343  | -1.05763500815834 | 3.48853581258547  |
| H | -6.23966395431864  | 0.66331088158850  | 3.65899362013484  |
| H | -6.61643256984848  | -0.31133410789572 | 5.09607679240158  |
| C | -4.48715278163097  | -2.04946160905636 | 4.94801891788937  |
| H | -4.94535255457721  | -2.04188759870048 | 5.94338782103877  |
| H | -3.43363179964081  | -2.32887970267566 | 5.05515878944911  |
| H | -4.982066617440600 | -2.82556922617466 | 4.35661299068018  |
| C | -3.99214827635401  | 0.37817389455064  | 5.23287927207558  |
| H | -4.49011205183015  | 0.34128203344816  | 6.20738973600152  |
| H | -4.10004526628785  | 1.39545818586749  | 4.84233376478988  |
| H | -2.92606459426085  | 0.18124579620416  | 5.39235434218157  |
| C | 0.61025680288683   | 2.03283204906695  | -2.28638729061204 |
| C | -0.54748777313690  | 2.48416958745078  | -3.19886458821783 |
| H | -0.23802436859197  | 2.44869990857379  | -4.25042875841005 |
| H | -0.85438963258713  | 3.50916585957278  | -2.96373662764799 |
| H | -1.42237811423875  | 1.83856284682697  | -3.07221268029840 |
| C | 1.79508978836321   | 2.98533337160492  | -2.48390391435983 |
| H | 1.52019694819587   | 4.02782177338922  | -2.29198757793513 |
| H | 2.14317129277681   | 2.92423536487717  | -3.52013018444871 |
| N | 1.64051964158834   | -4.46097764892660 | 0.63580720558306  |
| N | 2.34090231313602   | -0.94178309385611 | 0.35315069897019  |
| C | 1.59256456550477   | -5.54206820996724 | -0.14540828106220 |
| H | 1.40376150518573   | -6.49083856719445 | 0.35664831772014  |
| C | 1.75596384409080   | -5.51048011942569 | -1.52227422994731 |
| H | 1.68212348304442   | -6.43653370019876 | -2.08476331222292 |
| C | 1.99448239532683   | -4.28722506882561 | -2.15906366632839 |
| C | 2.04479836752805   | -3.16107564863671 | -1.34559725512682 |
| H | 2.22212622942082   | -2.17173974560264 | -1.74579425278037 |
| C | 1.85977705877352   | -3.28375585408114 | 0.03549538908404  |
| C | 1.87367092399243   | -2.07688434746455 | 0.89985260755179  |
| C | 1.39755135860372   | -2.13722885992806 | 2.20998192085375  |
| H | 1.05810925314295   | -3.09697307448251 | 2.58002061327017  |
| C | 1.36680633708184   | -0.99077040303667 | 3.00318395361393  |
| C | 1.86101139240793   | 0.17954945696932  | 2.42555917400038  |
| H | 1.86928313339611   | 1.12038252793442  | 2.96291071655720  |
| C | 2.33565858025880   | 0.14617138617131  | 1.11899073263690  |
| H | 2.72299516648355   | 1.05798257839512  | 0.66395448037666  |
| C | 2.18723695867606   | -4.22127379950129 | -3.67168096327383 |
| C | 3.41068105664428   | -5.07450551490823 | -4.05656737439877 |
| H | 3.27835410506777   | -6.12239522019198 | -3.77031098425144 |
| H | 4.31519626010700   | -4.70061792472235 | -3.56483197912750 |
| H | 3.56699001355685   | -5.03815740361493 | -5.14090902605866 |
| C | 0.93279950632612   | -4.78076430193875 | -4.36683276723199 |
| H | 1.05961994882177   | -4.72699868368908 | -5.45532941836665 |
| H | 0.03801358657664   | -4.21507944483775 | -4.08328956122076 |
| H | 0.75411523598946   | -5.82663265055167 | -4.09826081752594 |
| C | 2.41842508674930   | -2.78772911785051 | -4.16127274683713 |
| H | 2.54572365627680   | -2.79056414499532 | -5.24924011184407 |
| H | 3.31956663781467   | -2.34715435902763 | -3.72083005717978 |
| H | 1.56677048377760   | -2.14043295285689 | -3.92623928678722 |
| C | 0.85545111859793   | -1.04977674244034 | 4.44105099513216  |
| C | 1.93363601713340   | -1.73338462611271 | 5.30396145743728  |
| H | 1.60170850037347   | -1.79187487699540 | 6.34727993342271  |
| H | 2.87288870909004   | -1.17081380959472 | 5.27138576788556  |
| H | 2.13463712523716   | -2.74954152271193 | 4.94866508661136  |
| C | 0.56940070472622   | 0.35025179760815  | 5.00056877069472  |
| H | 1.48309873065785   | 0.94539418779258  | 5.10232893100569  |
| H | 0.12865292778391   | 0.26130446280026  | 5.99942979322429  |
| C | 1.05692182416781   | 0.61434417818081  | -2.68496935851873 |
| H | 1.83566163930091   | 0.24341704407079  | -2.01032372424349 |
| H | 1.45413643459937   | 0.62786606408132  | -3.70678515051220 |
| H | 0.22840676521788   | -0.10121987738571 | -2.66046175168136 |
| H | 2.63542351774781   | 2.71966330796372  | -1.83268496107654 |
| C | -5.79577278511310  | -5.70784285654318 | 0.33406493911624  |
| H | -4.70536529968786  | -5.63697039295574 | 0.40686922672472  |
| H | -6.17779351138768  | -6.06980695339503 | 1.29508613897387  |
| H | -6.19893712207879  | -4.70171477128066 | 0.17208550505567  |
| H | -4.58280541205933  | -8.08927447586115 | -0.46945738728471 |
| N | -1.68339058123297  | -5.10765092902843 | -1.85902645915636 |
| N | -2.35523170242839  | -8.64920563682295 | -1.99025445054631 |
| C | -1.54345803639061  | -4.15220072478273 | -0.93927658172182 |
| H | -1.33173380130974  | -3.14888043272403 | -1.30797338510261 |
| C | -1.65565717831795  | -4.37150365583107 | 0.42784011055476  |
| H | -1.50845432958122  | -3.53342015691084 | 1.10180892820577  |

|   |                   |                    |                   |
|---|-------------------|--------------------|-------------------|
| C | -1.94000942509637 | -5.65689802080090  | 0.89932767461355  |
| C | -2.07659212300885 | -6.65453740864432  | -0.06140212858415 |
| H | -2.28738981810576 | -7.68174417722147  | 0.20538467019666  |
| C | -1.94614519312231 | -6.34661178234068  | -1.41971032376110 |
| C | -2.09820005438175 | -7.41231930287546  | -2.44343345000613 |
| C | -1.95982832158816 | -7.12226893880626  | -3.80601019003795 |
| H | -1.78249539582177 | -6.09169623179198  | -4.08652873348958 |
| C | -2.05641340188373 | -8.14121190514054  | -4.75019890353616 |
| C | -2.31519318534972 | -9.42672552376470  | -4.26115623258657 |
| H | -2.39908808814559 | -10.27978989474968 | -4.92698570098226 |
| C | -2.46556509872215 | -9.62088677706268  | -2.89543716477847 |
| H | -2.68031585957862 | -10.61697374814856 | -2.50729137629259 |
| C | -2.05369614244261 | -5.94411704060752  | 2.39632250716083  |
| C | -0.63569585475442 | -5.94558096801985  | 2.99566487948624  |
| H | -0.11608369893862 | -5.00538650775469  | 2.79150345841878  |
| H | -0.03220469297970 | -6.74980882777670  | 2.56151689777708  |
| H | -0.68411886531275 | -6.09765692858167  | 4.08061051698948  |
| C | -2.89630395442782 | -4.85573160333041  | 3.08271472077604  |
| H | -2.97615850048688 | -5.06841641809586  | 4.15496489684983  |
| H | -3.90848798549228 | -4.82513084865671  | 2.66380975442173  |
| H | -2.45910862869732 | -3.85957326429763  | 2.97485008805795  |
| C | -2.71169728989607 | -7.30208120007281  | 2.67423262009693  |
| H | -2.82233812715947 | -7.43795126843763  | 3.75534323660564  |
| H | -2.10970184505696 | -8.13549757674246  | 2.29902844860730  |
| H | -3.70715582723161 | -7.36430262848555  | 2.22014350493278  |
| C | -1.83481572396089 | -7.90877143566444  | -6.24424168067971 |
| C | -0.44246628386243 | -8.46169917398485  | -6.60771528291489 |
| H | -0.24941577480407 | -8.32169794046452  | -7.67778864903599 |
| H | -0.36553783646032 | -9.53069313922657  | -6.38198866217361 |
| H | 0.33948986347491  | -7.93904769356254  | -6.04583784215548 |
| C | -2.90468166674614 | -8.64394749404404  | -7.07074842717256 |
| H | -2.85961886435145 | -9.72898622230113  | -6.94101878575700 |
| H | -2.75575560099084 | -8.43444557383871  | -8.13564180025415 |
| N | -3.80963824206083 | -2.55617299288604  | -2.81138031208969 |
| N | -4.82385433736308 | -5.44348854164559  | -4.70857241515447 |
| C | -3.14818397601610 | -1.41003665733419  | -2.99260542433202 |
| H | -3.10682503516653 | -0.74479932432262  | -2.13041563941147 |
| C | -2.52942750335716 | -1.06073828216667  | -4.18401419393103 |
| H | -2.00732111083612 | -0.11112056530150  | -4.25216261726243 |
| C | -2.59538970789561 | -1.92921447822295  | -5.27935753788841 |
| C | -3.28836323313377 | -3.11945469196258  | -5.08972769361088 |
| H | -3.40014278873404 | -3.84770656613875  | -5.88126976668116 |
| C | -3.87188104934275 | -3.40193695732846  | -3.84834253667087 |
| C | -4.59973041172099 | -4.67800676750965  | -3.63158857771438 |
| C | -5.01899467281217 | -5.04120236124511  | -2.34698070817722 |
| H | -4.78593904904911 | -4.36650589422712  | -1.53373064206870 |
| C | -5.70001534750262 | -6.23566041349553  | -2.14514419670437 |
| C | -5.92043181043813 | -7.03032806153200  | -3.27686051023801 |
| H | -6.44042488431981 | -7.98097228420125  | -3.20869678989879 |
| C | -5.46988464979300 | -6.59478902734315  | -4.51322641866915 |
| H | -5.64290457756714 | -7.20520332208315  | -5.39966175197406 |
| C | -1.93038570538370 | -1.55053332872737  | -6.60081777266329 |
| C | -2.53196242337392 | -0.22576965699949  | -7.10699639878482 |
| H | -2.36398449511570 | 0.59254029759592   | -6.39973205358988 |
| H | -3.61175013176584 | -0.32334467810042  | -7.26153688745580 |
| H | -2.07044271773755 | 0.05327299630897   | -8.06102698648134 |
| C | -0.41985978437075 | -1.37087055930165  | -6.36321190370391 |
| H | 0.07750764954265  | -1.08028419398407  | -7.29592349193610 |
| H | 0.02720931456467  | -2.30538767098259  | -6.00954592921675 |
| H | -0.21644233225145 | -0.59721987460707  | -5.61540773141895 |
| C | -2.12932146190046 | -2.62169164248879  | -7.67793344107627 |
| H | -1.63730191867018 | -2.30468361148563  | -8.60361092071214 |
| H | -3.18997659430604 | -2.78122218944483  | -7.89984988378321 |
| H | -1.69267126061686 | -3.58045321596299  | -7.37847031576686 |
| C | -6.21984008355319 | -6.67395972494808  | -0.77824302587012 |
| C | -7.75944412157359 | -6.71675185779030  | -0.83170573351720 |
| H | -8.16064940033989 | -7.02437075221010  | 0.14096957489382  |
| H | -8.11577438176460 | -7.42674843497144  | -1.58467720424615 |
| H | -8.16728956354003 | -5.73026380681678  | -1.07742439830788 |
| C | -5.67691891894143 | -8.07602737020033  | -0.44671672013613 |
| H | -6.03144964300846 | -8.82648852701582  | -1.15992648734069 |
| H | -6.01311282509967 | -8.38074754649106  | 0.55128138802104  |
| C | -1.89453904549437 | -6.42167837049354  | -6.60891194904097 |
| H | -2.86155661843794 | -5.99158110237289  | -6.32780891267242 |
| H | -1.76229841043434 | -6.30669633415843  | -7.69047629186773 |
| H | -1.10269961727973 | -5.84836225895239  | -6.1163266667277  |
| H | -3.90858768981347 | -8.30622270877899  | -6.79405243550504 |

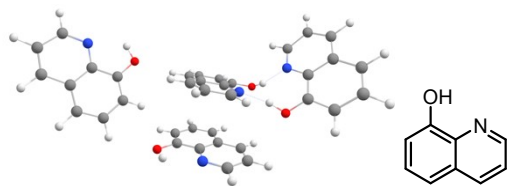

Main article molecule number: **2-tetramer (Fig. S3)**

Name: 8-Hydroxyquinoline

Qty of copies of the molecule modelled: 4

Qty of imaginary frequencies: 0

Final single point energy (Eh): -1908.29156454211

|   |                   |                   |                   |
|---|-------------------|-------------------|-------------------|
| N | 4.78446973345379  | -4.49078716841785 | -2.58004498628625 |
| N | -0.83919950326481 | 1.70222116546753  | -0.00167193273208 |
| N | -0.96605216384578 | 4.92943406991970  | -0.07454304422958 |
| N | -2.91380675258471 | -1.90905318751997 | 0.90919987755132  |
| C | 5.36343187092662  | -5.39505967290430 | -3.34511949620321 |
| C | -1.26753113750145 | 0.85933157272310  | -0.92348919699547 |
| C | 0.03435380979349  | 5.74932090668890  | -0.33276278825697 |
| C | -3.88791816280399 | -1.03076674845991 | 0.75889292973677  |
| H | 6.22050415400605  | -5.06490702448891 | -3.93132632055329 |
| H | -2.24733303682478 | 1.07216995088924  | -1.35096182871165 |
| H | 0.99615076039429  | 5.49119492907700  | 0.10998073229488  |
| H | -4.69050149877722 | -1.30396017041801 | 0.07390446115218  |
| C | 4.92425301535858  | -6.73324222802480 | -3.42702393093554 |
| C | -0.53913013031128 | -0.26917082115592 | -1.33915947871102 |
| C | -0.10273911221685 | 6.90974336068975  | -1.11842527267088 |
| C | -3.92075010852598 | 0.20973026218169  | 1.42556020366437  |
| H | 5.44510018631850  | -7.43004362649255 | -4.07627260474625 |
| H | -0.94717877625403 | -0.92230812535078 | -2.10352540325664 |
| H | 0.76047293190188  | 7.54074060946609  | -1.30371366652754 |
| H | -4.73454106485789 | 0.90238186957111  | 1.24018443463576  |
| C | 3.84149035612612  | -7.13100212780408 | -2.68103774296902 |
| C | 0.67273172997671  | -0.52737239596111 | -0.74927688236246 |
| C | -1.34106925065824 | 7.22682609692853  | -1.61651308053135 |
| C | -2.89818813264838 | 0.53934100408188  | 2.28188476030015  |
| H | 3.47935422834465  | -8.15541602067778 | -2.72316170717836 |
| H | 1.26966911613182  | -1.38750853323169 | -1.04098202045687 |
| H | -1.49163926694592 | 8.12560118173323  | -2.20978872671805 |
| H | -2.88518788021129 | 1.50020717797617  | 2.78985065038476  |
| C | 3.18671038240160  | -6.19853342181870 | -1.84619932917729 |
| C | 1.16345417715633  | 0.33686672152149  | 0.25451402433169  |
| C | -2.44477712733623 | 6.38439743161550  | -1.35448174959184 |
| C | -1.83981927836670 | -0.37185525205330 | 2.48571198648392  |
| C | 2.06465316435682  | -6.49979541216474 | -1.03995909981301 |
| C | 2.38314117046103  | 0.10472806215948  | 0.92779193838402  |
| C | -3.75269897208644 | 6.66805807547019  | -1.80475377243695 |
| C | -0.73831222714779 | -0.13251529287011 | 3.33984035945875  |
| H | 1.65939078289444  | -7.50766505238147 | -1.04352098502918 |
| H | 2.98060593328655  | -0.75968958650278 | 0.65518256991422  |
| H | -3.93369723481226 | 7.56720972321829  | -2.38632729067227 |
| H | -0.67632331264076 | 0.80822338246987  | 3.87880652506237  |
| C | 1.50053839599547  | -5.51313638547204 | -0.26453745003997 |
| C | 2.78552547832670  | 0.97680248700406  | 1.91150330311254  |
| C | -4.77551002609833 | 5.80281715704129  | -1.49365420443367 |
| C | 0.24572307832154  | -1.08466976230276 | 3.46016491485408  |
| H | 0.63569587344321  | -5.72831021796236 | 0.35496333751230  |
| H | 3.71991041697149  | 0.80391246112918  | 2.43857404859683  |
| H | -5.78631405685978 | 6.01712969328169  | -1.82904669206751 |
| H | 1.09773816244300  | -0.89800486248550 | 4.10682234696658  |
| C | 2.01465959043698  | -4.20093159845740 | -0.24627483698765 |
| C | 2.01833605792254  | 2.10589465049809  | 2.24447069372660  |
| C | -4.54020090397861 | 4.62768425941101  | -0.76106385398287 |
| C | 0.18989495307329  | -2.30372370809542 | 2.75330884385888  |
| H | 1.54997739537430  | -3.44293227712964 | 0.37567363390384  |
| H | 2.35026406776554  | 2.79672046427417  | 3.01361999975016  |
| H | -5.35169889108319 | 3.94123544568033  | -0.54020731280778 |
| H | 0.97262925605682  | -3.04732641641851 | 2.86953147491588  |
| C | 3.10714623151032  | -3.88330180953321 | -1.02022764469378 |
| C | 0.82676436031687  | 2.37386201816384  | 1.59704763014565  |
| C | -3.27019415764957 | 4.30474573097356  | -0.31682414161932 |
| C | -0.86729912218006 | -2.55590937221438 | 1.90962738502728  |
| C | 3.71494487174080  | -4.87601840922089 | -1.83987455681681 |

|   |                   |                   |                   |
|---|-------------------|-------------------|-------------------|
| C | 0.36276312716688  | 1.47154131480810  | 0.59164360907986  |
| C | -2.19483993534363 | 5.20789099520979  | -0.58201379526013 |
| C | -1.90478654721165 | -1.59271979867252 | 1.75784356068485  |
| O | 3.62048169082516  | -2.62987163308874 | -1.02757747379745 |
| O | 0.11691958540562  | 3.45834202694718  | 1.96118182645984  |
| O | -3.09172161574540 | 3.16827578549163  | 0.37329090067274  |
| O | -0.95125623120914 | -3.71255782108731 | 1.20905008678223  |
| H | 4.37209881288084  | -2.65878027385515 | -1.64978416084283 |
| H | -0.43993002227618 | 3.79946973114327  | 1.20774425668716  |
| H | -2.14830363642629 | 2.82378976002169  | 0.32383421489604  |
| H | -1.77866663258195 | -3.63912232023306 | 0.69512694011431  |

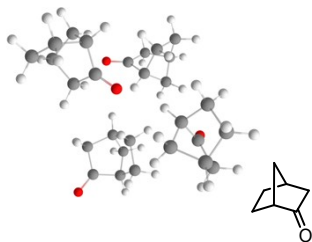

Main article molecule number: **3-tetramer (Fig. S3)**

Name: Norcamphor

Qty of copies of the molecule modelled: 4

Qty of imaginary frequencies: 0

Final single point energy (Eh): -1391.6439489357

|   |                   |                   |                  |
|---|-------------------|-------------------|------------------|
| C | 8.26373237254887  | 12.52156515022905 | 4.19815617658879 |
| C | 8.11998252597183  | 11.88367931899099 | 5.58995506372297 |
| C | 9.64509428867385  | 13.53945459587279 | 5.92529636642270 |
| H | 8.56632745243024  | 11.83413522280277 | 3.40124562831811 |
| H | 7.33763579280311  | 13.01711389945642 | 3.87783152409147 |
| C | 8.28047946559827  | 13.11754637102790 | 6.50503560563532 |
| H | 8.33911523469692  | 12.85550950561687 | 7.56714116983099 |
| H | 7.49778951838392  | 13.87109400926456 | 6.35908677328525 |
| C | 9.41234077694978  | 11.10417495713754 | 5.90250531966447 |
| H | 9.29775283585902  | 10.53011152320610 | 6.82639307305100 |
| H | 9.67734860698724  | 10.40229258608373 | 5.10333997261461 |
| C | 10.46951589224239 | 12.23099499055010 | 6.10197702582217 |
| H | 10.88913683071807 | 12.20111094453678 | 7.11339453339667 |
| H | 11.30059534327358 | 12.17597310642491 | 5.39110581744571 |
| H | 7.20107388495721  | 11.30486224107036 | 5.72248304815956 |
| H | 10.12574264950086 | 14.44160811019580 | 6.30701899922999 |
| C | 9.33616532237186  | 13.59077497540845 | 4.43647079214924 |
| O | 9.84724794356801  | 14.29951015739465 | 3.60057204006555 |
| C | 13.09045340700478 | 9.37529999467384  | 8.05239010216965 |
| C | 13.53497718535368 | 8.42720837602270  | 6.92471761816142 |
| C | 11.26817256280277 | 8.23846622542111  | 6.91109899012364 |
| H | 13.52476786428862 | 9.17430663219368  | 9.03759559459706 |
| H | 13.29842457941357 | 10.42468952104750 | 7.80268365876461 |
| C | 12.38135845009512 | 8.60887637308848  | 5.91419317870431 |
| H | 12.42305417295172 | 7.91654993139336  | 5.06790861946054 |
| H | 12.29473701863041 | 9.63371552641892  | 5.53611193644874 |
| C | 13.30807873597266 | 6.97638266063405  | 7.39916444938379 |
| H | 13.76356713791392 | 6.26571192397423  | 6.70214761942864 |
| H | 13.74504177452080 | 6.79604319589937  | 8.38693796397335 |
| C | 11.75458301516506 | 6.84394478745154  | 7.39868056467956 |
| H | 11.41624887015417 | 6.08917275930235  | 6.68157327857100 |
| H | 11.34506685773456 | 6.58290449759749  | 8.38001642376365 |
| H | 14.54066636481506 | 8.62413681589488  | 6.54401794164103 |
| H | 10.23883774675493 | 8.26338937327498  | 6.55889897638633 |
| C | 11.57182649126001 | 9.17534011848294  | 8.06408216982672 |
| O | 10.78975050559014 | 9.65687681226102  | 8.85608683025887 |
| C | 5.08856749986137  | 8.34288470025257  | 7.78143562370430 |
| C | 6.22010282336037  | 7.90121809394663  | 8.72717620010118 |
| C | 7.29736027498771  | 8.30938558747222  | 6.76732273410325 |
| H | 4.26729170854467  | 7.62804412371325  | 7.66050633509249 |
| H | 4.65188053594441  | 9.30142527305724  | 8.09222478767887 |
| C | 7.38518898002386  | 8.78466846533226  | 8.23113242404004 |

|   |                  |                  |                   |
|---|------------------|------------------|-------------------|
| H | 8.34919119061516 | 8.55297088515077 | 8.69440439420557  |
| H | 7.19095723894345 | 9.85778302501546 | 8.34659951566161  |
| C | 6.68924476900480 | 6.49657417811974 | 8.29479036439764  |
| H | 7.38274660096457 | 6.07791117290131 | 9.03094848201135  |
| H | 5.85180618534124 | 5.79825128687073 | 8.19424122504119  |
| C | 7.40877025258644 | 6.76690478159138 | 6.93954403284342  |
| H | 8.46805519736597 | 6.49284151914301 | 6.97696059601148  |
| H | 6.96112055567559 | 6.22482110972371 | 6.09971530458013  |
| H | 5.97591751624425 | 7.98724148251232 | 9.78905639864829  |
| H | 7.98293101766477 | 8.73061647993362 | 6.03318152575752  |
| C | 5.83424138727532 | 8.55764131579649 | 6.46221618405333  |
| O | 5.34084004847201 | 8.84807257433679 | 5.39213775776166  |
| C | 7.76329649894916 | 8.67575198351519 | 2.85643281737985  |
| C | 6.80300126406326 | 7.91809673715792 | 1.92222883830807  |
| C | 7.96825208080341 | 6.25598604751217 | 2.94687084221560  |
| H | 8.40927693945391 | 9.41535678190603 | 2.37078092483061  |
| H | 7.20298183589823 | 9.17293715368905 | 3.66154645180757  |
| C | 6.49307351264124 | 6.66954427784778 | 2.77556024293005  |
| H | 5.90643541308142 | 5.91620086851161 | 2.23836160345766  |
| H | 5.99465568536264 | 6.92177089499230 | 3.71717024977669  |
| C | 7.62583176914650 | 7.31449079791854 | 0.76546627336176  |
| H | 6.96757880412426 | 6.90632350659565 | -0.00818607026409 |
| H | 8.27091547528071 | 8.06025000591655 | 0.28948965459911  |
| C | 8.43834863999714 | 6.18210222122711 | 1.46356704956690  |
| H | 8.18286242677939 | 5.19730275344703 | 1.05929991389235  |
| H | 9.52148007072203 | 6.30764409350816 | 1.36922939456791  |
| H | 5.93559918894538 | 8.50304124994775 | 1.60770517687248  |
| H | 8.20907956871739 | 5.37641161514450 | 3.54683218012133  |
| C | 8.58208731646921 | 7.54269183279500 | 3.46722864577060  |
| O | 9.54837024872447 | 7.65453393318853 | 4.19439707927001  |

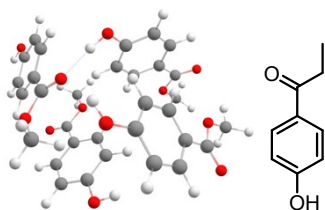

Main article molecule number: **4-tetramer (Fig. S3)**

Name: Methylparaben

Qty of copies of the molecule modelled: 4

Qty of imaginary frequencies: 0

Final single point energy (Eh): -2141.10037416641

|   |                   |                   |                   |
|---|-------------------|-------------------|-------------------|
| O | -0.24220178189292 | -1.47184632429158 | -4.45674117200936 |
| C | -0.57234941435552 | 0.29122265684313  | -2.87549418256951 |
| O | -0.22817569039748 | -1.94541116792921 | -2.24564350324148 |
| C | -0.59519997737067 | 1.30200198437623  | -3.84537031000551 |
| H | -0.46656620657472 | 1.02762735351184  | -4.88813285316328 |
| C | -0.76051316781811 | 0.63617188993899  | -1.53303113006920 |
| H | -0.77274894197659 | -0.13018679104377 | -0.76931071042750 |
| C | -0.34064381980519 | -1.10099021795512 | -3.30315615096065 |
| C | -0.02025373601769 | -3.32904684607657 | -2.58164194016139 |
| H | 0.90660141239750  | -3.44834108678056 | -3.14950655355830 |
| H | 0.04920273159717  | -3.85317807587376 | -1.62751597849715 |
| H | -0.85752161441554 | -3.70963945532028 | -3.17383399973355 |
| O | 3.25216938935806  | 1.66213179483105  | -0.61729143953308 |
| C | 3.34105596753012  | -0.01633247957198 | -2.32640547305653 |
| C | 4.05478312408252  | -0.95332534518647 | -1.56566098872770 |
| H | 4.48140337077503  | -0.66659032295615 | -0.61001965931223 |
| O | 3.92119299822855  | -3.89425746805147 | -3.67022544010739 |
| H | 3.54244046907675  | -4.02037811905287 | -4.54903095544322 |
| C | 4.24892278576345  | -2.24015505305599 | -2.03012565844153 |
| H | 4.80617831641486  | -2.96916784370430 | -1.45135248805778 |
| C | 3.72085029471160  | -2.61139336130251 | -3.26964807982854 |
| C | 3.01194541086778  | -1.68811584135819 | -4.04153839984819 |
| H | 2.57609673441794  | -1.98167377808033 | -4.99345741080854 |
| C | 2.83200673954532  | -0.39886560803076 | -3.57337999180326 |
| H | 2.26704885590230  | 0.31090364921747  | -4.16619259438210 |



|   |                   |                   |                   |
|---|-------------------|-------------------|-------------------|
| C | 3.11683678776832  | 1.33896354657331  | -1.79875020010991 |
| H | -1.11972367326873 | 4.35081786872717  | -0.84920424475269 |
| O | -1.07857675356225 | 4.26799349304298  | -1.81559965280299 |
| C | -0.77397512647614 | 2.62558771928454  | -3.48434604822123 |
| H | -0.78812114632910 | 3.41634791251754  | -4.22786174213673 |
| C | -0.93837395685709 | 2.95614730224899  | -2.13493428286722 |
| C | -0.94426161566738 | 1.95534853237915  | -1.16083483135505 |
| H | -1.09717010793981 | 2.20792312502526  | -0.11546703468118 |
| O | 2.75268414495011  | 2.20183463802972  | -2.74979729226654 |
| C | 2.48461240819920  | 3.55891423241229  | -2.33626243214130 |
| H | 1.68020427008720  | 3.58396321608537  | -1.60040340831015 |
| H | 3.38808906050959  | 4.01039451196904  | -1.91609506278309 |
| H | 2.18155862911023  | 4.08001960901694  | -3.24385896116375 |
| H | 3.30723282322993  | 0.45624695605374  | 0.78403432378782  |
| O | -1.87690786165807 | -2.62716187867581 | 4.12875587849635  |
| C | -0.20463502671618 | -1.90134372465721 | 2.58456587819053  |
| O | -2.23902127767062 | -2.87594744617136 | 1.91268912574486  |
| C | 0.68881615147750  | -1.51340839506898 | 3.59093993638183  |
| H | 0.41736517535123  | -1.69433324058238 | 4.62631565430227  |
| O | 3.33323801794305  | 0.06518144614492  | 1.68305265121170  |
| C | 1.88027078080181  | -0.88710266802400 | 3.27334217203953  |
| H | 2.57026610480469  | -0.56301961672180 | 4.04610998523015  |
| C | 2.19039083408384  | -0.61921629853491 | 1.93477271192868  |
| C | 1.32192051882051  | -1.03349332124538 | 0.91893955839157  |
| H | 1.56975449747645  | -0.84449440622689 | -0.12256725736943 |
| C | 0.13767024490063  | -1.67423772795913 | 1.24732942876689  |
| H | -0.53511788579800 | -1.99224496460371 | 0.45832659484310  |
| C | -1.49567916738698 | -2.49536597617625 | 2.98193889076116  |
| C | -3.51891269658408 | -3.44827102784294 | 2.23783826794656  |
| H | -3.97339503412564 | -3.70834754645848 | 1.28125706089096  |
| H | -4.13967514821081 | -2.72295431887775 | 2.77213551574238  |
| H | -3.39481865761691 | -4.33732447013587 | 2.86261875901821  |
| O | -2.55449765439269 | 1.02923175908753  | 3.49077165403427  |
| C | -3.74613526886984 | 0.46176422657209  | 4.07118185618249  |
| H | -4.08570233357019 | 1.07082437078662  | 4.91379085023625  |
| H | -3.45603898268035 | -0.53600955889010 | 4.40274446578655  |
| H | -4.54494553154344 | 0.41374966658550  | 3.32476260259427  |
| O | -3.71282959796181 | 2.92987008800056  | 3.08569158179152  |
| C | -1.40617077546180 | 2.80644016412730  | 2.47378573811186  |
| C | -1.37123291300983 | 4.10772806505318  | 1.95728075983470  |
| H | -2.27453479097095 | 4.70907431905977  | 2.00380242421834  |
| O | 2.05778899256412  | 4.33456488667555  | 0.77777413669412  |
| H | 2.69224950502532  | 3.61587563787974  | 0.62635822214900  |
| C | -0.20843752920203 | 4.61639712582200  | 1.39492181430973  |
| H | -0.16170251917339 | 5.63253325771843  | 1.01159981968889  |
| C | 0.94239538062877  | 3.81802980361652  | 1.35322093640747  |
| C | 0.92471375578097  | 2.53360217048588  | 1.89784428920878  |
| H | 1.83119509298432  | 1.93789506457133  | 1.89441973451019  |
| C | -0.24218663420396 | 2.03056821142109  | 2.44678759681631  |
| H | -0.25024639367219 | 1.02683640455167  | 2.85711713337961  |
| C | -2.67829636596225 | 2.29674111223020  | 3.03601650507945  |

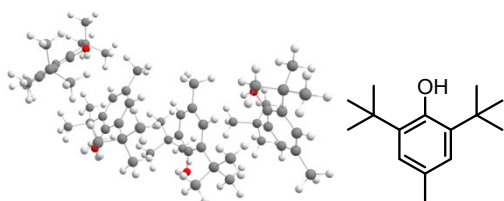

Main article molecule number: **5-tetramer (Fig. S3)**

Name: BHT

Qty of copies of the molecule modelled: 4

Qty of imaginary frequencies: 0

Final single point energy (Eh): -2644.49861619493

|   |                   |                  |                    |
|---|-------------------|------------------|--------------------|
| C | -6.64017921128843 | 6.11484631857510 | -9.38778233464553  |
| C | -7.03785002807618 | 4.72975654239040 | -8.85387470810526  |
| C | -6.80889586932946 | 3.64272000621556 | -9.92439367725558  |
| H | -7.42918339780533 | 3.79465053066593 | -10.80805324596989 |
| H | -7.04682705452542 | 2.65899549080674 | -9.50191224159547  |

S33

|   |                    |                   |                    |
|---|--------------------|-------------------|--------------------|
| H | -5.75612501723615  | 3.62916122587467  | -10.22631251262655 |
| C | -8.51458829217383  | 4.74154939504453  | -8.40881757889635  |
| H | -9.19004335099479  | 4.97285683821538  | -9.23401455774088  |
| H | -8.66419743342473  | 5.48524943706230  | -7.61762945986841  |
| H | -8.78543921758224  | 3.75852722616285  | -8.00562810997077  |
| C | -6.19620893944857  | 4.33331684952436  | -7.63230953903629  |
| H | -6.51406350401628  | 3.34210685389727  | -7.29092813135488  |
| H | -6.33427480634088  | 5.02825792582250  | -6.79599536308659  |
| H | -5.12920660795241  | 4.27124620187904  | -7.87136354856471  |
| C | -7.24687740599630  | 6.67339636945365  | -10.53435688124257 |
| O | -8.21712790863282  | 5.91199584184534  | -11.14220912945128 |
| H | -8.58441424788747  | 6.40882653903107  | -11.87900477883964 |
| C | -6.88267470300546  | 7.93690299114668  | -11.04304696315252 |
| C | -7.48600864280706  | 8.50626181548137  | -12.34061856364686 |
| C | -7.13873268590888  | 7.58769294755628  | -13.53530557706542 |
| H | -7.50010730283759  | 6.55878714338051  | -13.43914795387211 |
| H | -6.05146112632415  | 7.52892992944419  | -13.65053433379686 |
| H | -7.56048290450016  | 8.00164626013961  | -14.45829540128280 |
| C | -9.01278569744148  | 8.72166127165437  | -12.22179843437045 |
| H | -9.22538608213854  | 9.42137078666130  | -11.40796882665070 |
| H | -9.60781116486760  | 7.82096275924524  | -12.02911979722734 |
| H | -9.39495458767252  | 9.15688820486770  | -13.15166397248421 |
| C | -6.90456813661832  | 9.88948448746459  | -12.67740796912111 |
| H | -7.13454132905674  | 10.62520825693186 | -11.89949204848213 |
| H | -7.35206414968421  | 10.24469581481456 | -13.61194606766652 |
| H | -5.82025717428377  | 9.84930207600722  | -12.82449126112901 |
| C | -5.91310879579785  | 8.65169979961646  | -10.33502908843201 |
| H | -5.62302067745049  | 9.63880264483618  | -10.67595007865511 |
| C | -5.29922584477283  | 8.14906896559528  | -9.19503428601639  |
| C | -4.27341457875776  | 8.96020677165489  | -8.44903744315634  |
| H | -4.67550421804780  | 9.33592152303475  | -7.49869647190288  |
| H | -3.94879245887434  | 9.82431671500774  | -9.03624675853369  |
| H | -3.38904726250012  | 8.36254739401617  | -8.20478817238834  |
| C | -5.66243926700251  | 6.87857638738027  | -8.75146001628511  |
| H | -5.15480914823009  | 6.47970814498983  | -7.88024045119948  |
| C | -2.32355526802591  | 4.08426257476777  | -7.79928963635146  |
| C | -1.82767927614356  | 4.74604817839623  | -6.50343994175127  |
| C | -2.78034954451903  | 5.87694239350137  | -6.06839475920212  |
| H | -2.83337902644063  | 6.66917237718644  | -6.81521010977386  |
| H | -2.42868687653943  | 6.31538067449675  | -5.12691625343921  |
| H | -3.78963428524466  | 5.48307272916251  | -5.90255073164031  |
| C | -0.40106384065598  | 5.29947695557601  | -6.69998511458042  |
| H | 0.28082012105008   | 4.49491596648092  | -6.99700473988111  |
| H | -0.03668291092831  | 5.72353633558907  | -5.75680461228694  |
| H | -0.36639965476526  | 6.07846663433477  | -7.46207851719405  |
| C | -1.76314077903585  | 3.74398844467845  | -5.34007311322161  |
| H | -1.38545000059433  | 4.26019390738838  | -4.45121643391178  |
| H | -1.08431009948200  | 2.91094809441636  | -5.55248255362027  |
| H | -2.74962529057391  | 3.33809834020092  | -5.09059121798122  |
| C | -2.41061150300490  | 4.79162669504884  | -9.01639135268396  |
| O | -2.08863306762666  | 6.12882993553834  | -8.97757843672380  |
| H | -2.39722087357703  | 6.53953052216832  | -9.79264541438734  |
| C | -2.77584381806161  | 4.16613844018445  | -10.22776057668083 |
| C | -2.70406287046928  | 4.89315674962470  | -11.58540263046378 |
| C | -3.67219038816475  | 6.09448567661650  | -11.67191592280764 |
| H | -3.44951768401003  | 6.94356502077180  | -11.01457826432679 |
| H | -4.69620145082216  | 5.78980921565105  | -11.43556002139847 |
| H | -3.65547524265291  | 6.49873930198534  | -12.69048807557326 |
| C | -1.25059597373204  | 5.34169443219990  | -11.85792473715770 |
| H | -0.85084576939242  | 6.01005674032300  | -11.09060761029490 |
| H | -1.19542717674909  | 5.86136535698179  | -12.82166569337666 |
| H | -0.59268506292221  | 4.46756350554215  | -11.90119305595441 |
| C | -3.10033751036139  | 3.96388154533935  | -12.74468841656754 |
| H | -2.45075239574870  | 3.08502788013263  | -12.80442690930952 |
| H | -3.00163816336863  | 4.51206833470682  | -13.68739421392066 |
| H | -4.14035278879904  | 3.62962995916251  | -12.66281646653195 |
| C | -3.14536416150129  | 2.82109083674776  | -10.16141433444327 |
| H | -3.45426033450695  | 2.30445300695619  | -11.06310894357517 |
| C | -3.13480940448855  | 2.10029790527651  | -8.97311410780859  |
| C | -3.60674715629443  | 0.67198696473579  | -8.93458893288918  |
| H | -3.12647829416135  | 0.11430582111782  | -8.12487150237840  |
| H | -3.39597696722486  | 0.15481908600119  | -9.87590041538604  |
| H | -4.69091116375067  | 0.62166811348072  | -8.77030361962964  |
| C | -2.69595236370189  | 2.73990313401216  | -7.81861001159091  |
| H | -2.65720519498788  | 2.16216349678406  | -6.90214173828535  |
| C | -9.54378901182812  | 12.39064196970959 | -10.46029618661168 |
| C | -10.48864317025346 | 13.10697181770932 | -11.43827905629339 |
| C | -11.69974714465844 | 13.70913074579846 | -10.69680465228376 |
| H | -12.30338134804725 | 12.94864581624144 | -10.20097235174140 |
| H | -12.33677602824847 | 14.24122316660360 | -11.41354253276211 |
| H | -11.36071087838414 | 14.43724343538337 | -9.95224915391926  |
| C | -10.96268279362592 | 12.12135654826067 | -12.52615506852435 |

|   |                    |                   |                     |
|---|--------------------|-------------------|---------------------|
| H | -11.50406722317951 | 11.27261118824092 | -12.10467784070660  |
| H | -10.10350652954078 | 11.74028851679612 | -13.09014882944300  |
| H | -11.62582255538249 | 12.64008516700370 | -13.22857480609596  |
| C | -9.78492487667866  | 14.27027181452666 | -12.15322802092206  |
| H | -10.49867353991421 | 14.75261460101409 | -12.82989536637174  |
| H | -8.93818033356411  | 13.92730660000712 | -12.75876389804373  |
| H | -9.43266057136787  | 15.03282410886203 | -11.45038965664859  |
| C | -9.97869006276849  | 11.31258289671857 | -9.65773537433499   |
| O | -11.29638258229956 | 10.94477439755029 | -9.79491529579002   |
| H | -11.46539169834351 | 10.18078961357951 | -9.23601043741381   |
| C | -9.12105460182661  | 10.64210402757696 | -8.76215062695746   |
| C | -9.61223544960204  | 9.50094690334424  | -7.85212400255019   |
| C | -10.69519671504387 | 10.02337478607136 | -6.87963964880795   |
| H | -11.58369259576053 | 10.43983661908995 | -7.36544802171083   |
| H | -10.27624227976904 | 10.82050685446776 | -6.25682017840051   |
| H | -11.02812776063872 | 9.21185186964793  | -6.22278505008950   |
| C | -10.12456207931419 | 8.29367192591008  | -8.67248559470765   |
| H | -9.30758257853130  | 7.88827605438993  | -9.27668711008773   |
| H | -10.95131896531088 | 8.50319897457712  | -9.36105767952253   |
| H | -10.4669985515719  | 7.50515009856754  | -7.99327410777626   |
| C | -8.47770927848803  | 8.94447097920345  | -6.97624900638002   |
| H | -7.67108632259731  | 8.51670352138590  | -7.58150220422842   |
| H | -8.87752642583995  | 8.14386495938714  | -6.34453751178923   |
| H | -8.06140593629837  | 9.71138150328801  | -6.31472085208482   |
| C | -7.79090762712853  | 11.06793898075605 | -8.71583798511186   |
| H | -7.08949673894461  | 10.55931552640624 | -8.06470946245005   |
| C | -7.31658178058909  | 12.11952096044829 | -9.48915156510463   |
| C | -5.87146516367494  | 12.53595196210320 | -9.42091482930532   |
| H | -5.38306734646702  | 12.44795596879001 | -10.39974781328822  |
| H | -5.31791597263141  | 11.91444140270578 | -8.71177973754859   |
| H | -5.76456074147695  | 13.58160099712149 | -9.11029902501317   |
| C | -8.20832794572386  | 12.77106595742303 | -10.34045617133849  |
| H | -7.83596301642831  | 13.60379755192840 | -10.92643584272539  |
| C | -8.16630283763356  | 17.19899682410929 | -10.14619815367112  |
| C | -6.77983996314184  | 17.41683555582562 | -10.77219505262273  |
| C | -6.22062075157336  | 16.09388312500445 | -11.33108960763964  |
| H | -6.10254736364702  | 15.34338267675527 | -10.54968619574810  |
| H | -5.24065592613249  | 16.26975128827943 | -11.79070345929428  |
| H | -6.88923352495165  | 15.69380144213849 | -12.10206122770010  |
| C | -5.81016706918273  | 18.00405129860436 | -9.72564401271632   |
| H | -6.20771037820732  | 18.94301354696778 | -9.32457902271783   |
| H | -4.84331198532498  | 18.21777014746136 | -10.19643399914771  |
| H | -5.64303223346118  | 17.31862091989585 | -8.89413109266329   |
| C | -6.83258133603596  | 18.41023766632295 | -11.94351387230311  |
| H | -5.81992215190497  | 18.54262560153948 | -12.33851669079979  |
| H | -7.19834882958763  | 19.39461046354824 | -11.63185219362504  |
| H | -7.46005157291256  | 18.04543180284388 | -12.76402773379029  |
| C | -8.35558639603680  | 16.38088791117733 | -9.01282031816362   |
| O | -7.24691835011628  | 15.72492678770415 | -8.52838010349912   |
| H | -7.54787143371463  | 15.00953276055558 | -7.95668007321800   |
| C | -9.60690931543414  | 16.25644780163790 | -8.37328790447829   |
| C | -9.77630468863683  | 15.51879163502309 | -7.02970394496661   |
| C | -9.46261195772687  | 14.00868722333937 | -7.12938186231441   |
| H | -8.41806202157571  | 13.74249553263191 | -7.33488564017620   |
| H | -10.05803786035875 | 13.53697425878329 | -7.91635852603515   |
| H | -9.70539250970746  | 13.52759779327157 | -6.17499592607199   |
| C | -8.89074868161071  | 16.18998294732614 | -5.95620626976532   |
| H | -7.82707226887086  | 16.18264688115188 | -6.20753318689139   |
| H | -9.01636389633877  | 15.67713019324536 | -4.99546506002968   |
| H | -9.18838168911491  | 17.23590448107030 | -5.82826192244611   |
| C | -11.22453314131367 | 15.60318880155968 | -6.51918500094613   |
| H | -11.54693229444262 | 16.63935605107528 | -6.37674625300912   |
| H | -11.28702980761579 | 15.10006930098933 | -5.54878389715940   |
| H | -11.92685137221306 | 15.10483511586683 | -7.19625930934913   |
| C | -10.69248116095198 | 16.90079089548672 | -8.97107265142072   |
| H | -11.67825044003602 | 16.81493663592172 | -8.52838096300068   |
| C | -10.56539873407825 | 17.66387683075398 | -10.12552338172961  |
| C | -11.77143487673356 | 18.28801426237681 | -10.774114171712196 |
| H | -11.51319528362521 | 19.22144580255628 | -11.28373797467312  |
| H | -12.55218491535182 | 18.50639780237368 | -10.03901764167132  |
| H | -12.20699266523664 | 17.61493842955128 | -11.52375305943176  |
| C | -9.29689525554272  | 17.82280211113546 | -10.67413122353622  |
| H | -9.19944179131148  | 18.44919463887185 | -11.55367398580910  |

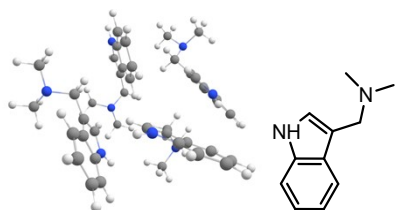

Main article molecule number: **6-tetramer (Fig. S3)**

Name: Gramine

Qty of copies of the molecule modelled: 4

Qty of imaginary frequencies: 0

Final single point energy (Eh): -2147.86968350666

|   |                   |                   |                   |
|---|-------------------|-------------------|-------------------|
| H | -0.18832837142830 | -6.97608920921248 | -0.44879070368852 |
| H | -2.81224591500327 | -3.81991420161933 | -5.73553422090333 |
| N | 0.17221754957231  | -3.11608470816739 | 1.60522918252083  |
| N | -3.03223607497139 | 2.30684465208807  | -3.51174167265199 |
| N | -0.71572541112898 | 1.06315698306302  | 3.74598403305834  |
| N | 2.42239271084893  | -2.66978383858388 | -1.73698495132613 |
| N | 3.03061240656733  | 0.51821747396324  | 1.83676589646774  |
| N | 1.42765134320265  | 1.35607528218982  | -3.26129868727717 |
| N | -2.71439317422310 | 4.19288693983983  | 0.98564781929301  |
| N | -1.24537563836560 | -3.42866730275829 | -4.39118722280471 |
| C | 0.58165481272960  | -2.01529592393975 | 0.88107651630357  |
| C | -1.76852566185816 | 2.83882456408489  | -3.67474612699376 |
| C | -1.54121184966845 | 1.16755308157501  | 2.64446104007755  |
| C | 1.46816593305269  | -2.01996596599636 | -2.49680457990581 |
| C | 1.18065509370434  | -1.10040403787783 | 1.70597959290922  |
| C | -0.87612563908226 | 2.17290958097654  | -2.87453056083146 |
| C | -1.39062349318885 | 2.39756635833487  | 2.05687363233175  |
| C | 0.35248818426162  | -2.80912714948669 | -2.61618646571151 |
| C | 1.64023903578545  | -1.24713763395849 | 4.27412024489814  |
| C | -1.29553660160737 | 0.23316889900119  | -1.18912539479263 |
| C | 0.19614168320849  | 4.36162211967253  | 2.71966189104573  |
| C | -0.15015220077079 | -5.13784665739015 | -1.55168733201074 |
| C | 1.46214131025824  | -2.07536143872809 | 5.37338382010682  |
| C | -2.29735617977474 | -0.56293171247789 | -0.65903942379396 |
| C | 1.18059619685613  | 4.71305750769646  | 3.63103500513669  |
| C | 0.38943927734434  | -6.09084229262555 | -0.69889835915187 |
| C | 0.84015606593753  | -3.33051899592377 | 5.24772176198646  |
| C | -3.62936494154849 | -0.44068696256024 | -1.09314765347183 |
| C | 1.58149718430974  | 3.82959410065950  | 4.64963343747394  |
| C | 1.68264833390182  | -5.94253619300800 | -0.16262018123500 |
| C | 0.37770898995466  | -3.78467690995712 | 4.02042737796456  |
| C | -3.99076022229618 | 0.48835227482166  | -2.05902208599848 |
| C | 1.00545711191449  | 2.57435904928807  | 4.78283541017891  |
| C | 2.46429130355458  | -4.83649651308731 | -0.46376090451240 |
| C | 0.54602595800049  | -2.94775085838328 | 2.91952154401802  |
| C | -2.97900167394363 | 1.29047143564482  | -2.58310841925378 |
| C | 0.02005639531271  | 2.22092349602189  | 3.86293483861458  |
| C | 1.91554943220956  | -3.87706070706683 | -1.31097428662559 |
| C | 1.17353130031241  | -1.67569790159071 | 3.02252463704584  |
| C | -1.62821891725467 | 1.17607496399888  | -2.16683616327522 |
| C | -0.39358334271070 | 3.09405943808302  | 2.82038040061951  |
| C | 0.61208987924121  | -4.00335569339554 | -1.86294745697190 |
| C | 1.69284403326837  | 0.24483174393377  | 1.30711010791567  |
| C | 0.58383329093888  | 2.44877384166746  | -2.74580075584591 |
| C | -2.08176050124086 | 2.87694005706394  | 0.82551140057678  |
| C | -0.90027548659842 | -2.45692444442753 | -3.34500795524855 |
| C | 3.38277869795905  | 1.91770276006495  | 1.63132204936846  |
| C | 2.83328601939593  | 1.64453044785300  | -2.99071108769287 |
| C | -3.28183059850325 | 4.61431773785286  | -0.28942396098749 |
| C | -2.53376075470016 | -3.07870957330073 | -4.97837495478563 |
| C | 4.01967377043246  | -0.36626163937335 | 1.24162492694370  |
| C | 1.21415964746316  | 1.15089480793966  | -4.69162778270704 |
| C | -3.74527337715424 | 4.16005491164507  | 2.01808698295193  |
| C | -0.21262702943157 | -3.48618546767655 | -5.41993356651856 |
| H | -3.86697590445525 | 2.64966242030814  | -3.95407673025637 |
| H | -0.49382840216231 | 0.19676615616111  | 4.21353064039266  |
| H | 0.39745643795012  | -1.96441129425291 | -0.18314257475816 |
| H | -1.59733820853685 | 3.66099668830864  | -4.35722864091303 |
| H | -2.17377138720070 | 0.34205594358569  | 2.34675563221300  |
| H | 1.62395258613535  | -1.00867245246547 | -2.85666282717567 |

|   |                   |                   |                   |
|---|-------------------|-------------------|-------------------|
| H | 2.15082056020910  | -0.29195330787029 | 4.35752631585317  |
| H | -0.27027579838658 | 0.14242811973539  | -0.84690037715533 |
| H | -0.12802871156178 | 5.04951466937027  | 1.94463064021127  |
| H | -1.14034110997105 | -5.26161576478266 | -1.98029965424049 |
| H | 1.82221738122939  | -1.75858945946957 | 6.34812843588975  |
| H | -2.04902670018452 | -1.29421949125413 | 0.10525293138071  |
| H | 1.64899937427975  | 5.69090445999906  | 3.56508124810582  |
| H | 0.72375472555758  | -3.95850953012580 | 6.12601396330074  |
| H | -4.39241477184937 | -1.08044609737650 | -0.65961121877332 |
| H | 2.35382763419776  | 4.13687424052274  | 5.34869846397993  |
| H | 2.07577737840732  | -6.70722705333517 | 0.50066744884419  |
| H | -5.02278522980535 | 0.58881179209414  | -2.38359037950574 |
| H | 1.30844002072005  | 1.89578265210627  | 5.57513839093471  |
| H | 1.02270921535987  | 1.03096527735110  | 1.68056536932349  |
| H | 0.81986367783203  | 3.40755850501261  | -3.25441213883001 |
| H | -1.35217132854758 | 2.96952161847786  | 0.00717104423072  |
| H | -1.74211281551376 | -2.42204543555396 | -2.63873160424856 |
| H | 1.68083077279221  | 0.32314242164894  | 0.19478767116881  |
| H | 0.83991878204544  | 2.58171496171673  | -1.68399434109700 |
| H | -2.81499793819019 | 2.10953624646340  | 0.50012414982746  |
| H | -0.79889717854334 | -1.42899376789866 | -3.75490284216778 |
| H | 0.16643800505326  | 0.89643152575622  | -4.87881426160057 |
| H | -3.30254226555912 | 3.87026519673460  | 2.97597330743516  |
| H | 1.83750748715100  | 0.31998117892723  | -5.04173203742824 |
| H | -4.18682678069035 | 5.15665763423531  | 2.12815824353210  |
| H | 4.10990665123304  | -0.21592520195893 | 0.14069747502236  |
| H | 1.46653660194452  | 2.04806898300315  | -5.29305597939823 |
| H | -4.55945994144487 | 3.44313289383063  | 1.78282547009600  |
| H | -0.06430649696711 | -2.51039186977832 | -5.92911429255310 |
| H | 4.36586590542064  | 2.12254210902306  | 2.06949510085939  |
| H | 3.45810616806316  | 0.81168990297357  | -3.33523787631910 |
| H | -3.71023657987223 | 5.61866050151312  | -0.19548423606798 |
| H | 2.64682813157853  | 2.56394406671489  | 2.12201050207474  |
| H | 2.98772537804555  | 1.76527356723090  | -1.91229931332439 |
| H | -2.49684497375517 | 4.64207716754450  | -1.05488231105765 |
| H | -3.30737326206312 | -3.07226879869393 | -4.20203904744705 |
| H | 3.42483561794263  | 2.19336974334245  | 0.55543115701414  |
| H | 3.18859350437437  | 2.56526703868186  | -3.49551493856298 |
| H | -4.07984800598329 | 3.92986881555041  | -0.64912643454403 |
| H | -2.52809681139872 | -2.07852591415320 | -5.46013774770574 |
| H | -0.11308627414429 | -3.98697319118584 | 1.18233049935979  |
| H | 3.25291454690551  | -2.23460792212158 | -1.37132025360689 |
| H | -0.09918307920450 | -4.75627863572099 | 3.92389569243539  |
| H | 3.45632529517464  | -4.71683723399898 | -0.03743954828366 |
| H | 3.74267043274088  | -1.41011988895346 | 1.42703589052177  |
| H | 0.74094370848496  | -3.78499837982525 | -4.97389122583685 |
| H | 5.00360995929468  | -0.18360435319827 | 1.68712451333662  |
| H | -0.48815487917773 | -4.22875903040103 | -6.17652699731964 |

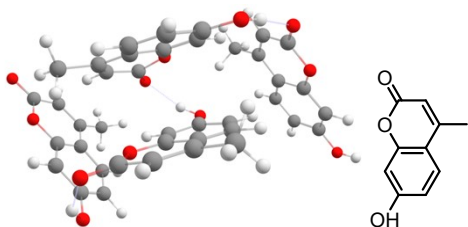

Main article molecule number: **7-tetramer (Fig. S3)**

Name: Hymecromone

Qty of copies of the molecule modelled: 4

Qty of imaginary frequencies: 0

Final single point energy (Eh): -2445.94062319554

|   |                   |                   |                   |
|---|-------------------|-------------------|-------------------|
| H | -3.40015681972073 | 0.54514758614566  | -1.63500877188130 |
| H | -2.81038777850878 | 0.79657626720604  | -4.05107473542904 |
| H | -2.89067716958246 | -0.58976564838418 | -5.16088485626715 |
| O | 0.30921691547521  | -2.09110876178714 | -1.92672105667610 |
| O | 0.94823160498191  | -3.22785393940469 | -3.71999204928346 |
| O | 0.95476253678851  | -4.98276863590051 | -1.49454788160366 |
| H | 1.17592764665139  | -4.61572050762967 | -2.37352067822172 |

|   |                   |                   |                   |
|---|-------------------|-------------------|-------------------|
| C | 0.14864827682879  | -2.42354380146493 | -3.26034451767366 |
| C | -0.92762530629654 | -1.79035350877299 | -3.96205253188562 |
| H | -1.00230510674781 | -2.01999750022682 | -5.01914147173357 |
| C | -1.81260379397577 | -0.95811961037697 | -3.34328859766427 |
| C | -1.66472978569689 | -0.70635710139884 | -1.93639504470097 |
| C | -2.53043037908869 | 0.09405626294932  | -1.16737553907951 |
| C | -2.27437433845126 | 0.35215892186631  | 0.16187941439241  |
| H | 0.29087210373950  | -4.78401861254448 | 0.97437839730598  |
| C | -1.12226637354838 | -0.17245533771440 | 0.77196480778355  |
| C | -0.28969752133169 | -1.03679829721416 | 0.06531843544729  |
| C | -0.56302904223171 | -1.27438727336364 | -1.27331086530800 |
| C | -2.91180020500054 | -0.29421735732497 | -4.11025977222311 |
| H | -3.89283063076697 | -0.55389140366069 | -3.69649373299050 |
| O | 1.17792430654322  | 1.68690319947795  | 0.12028723204466  |
| O | 1.98075229989981  | 0.56856757492890  | 1.86236644141840  |
| O | -1.50394158953107 | 3.24144755617884  | -3.45026783172879 |
| H | -1.97109701606926 | 3.67395727163917  | -2.70641780335304 |
| C | 2.07570254463933  | 0.77801335715267  | 0.65747446651640  |
| C | 2.99710666303722  | 0.16442654240438  | -0.24718988723296 |
| H | 3.77657018902607  | -0.43419027024221 | 0.20765497615729  |
| C | 2.84658268332278  | 0.24233301073038  | -1.60168585182451 |
| C | 1.76002494044176  | 1.02029923780099  | -2.12949857834720 |
| C | 1.41514852733954  | 1.10011686107525  | -3.49288906890637 |
| H | 1.99965091936980  | 0.54593468578238  | -4.22043340378896 |
| C | 0.34023139269276  | 1.84833239739612  | -3.92298687845992 |
| H | 0.06968799992566  | 1.89301636909472  | -4.97283068956427 |
| C | -0.43636279150926 | 2.55898514154515  | -2.99056450736150 |
| C | -0.11078228007153 | 2.51546495329366  | -1.63803980881441 |
| H | 0.57413137229064  | -1.50731049595092 | 0.52536883818060  |
| H | -0.71427173513815 | 3.01834564737770  | -0.89489773218278 |
| C | 0.96059572006772  | 1.74389055181372  | -1.22811888484792 |
| C | 3.75348036155158  | -0.50846614835690 | -2.52219531790826 |
| H | 4.17855078665924  | 0.15815222976950  | -3.28065897618748 |
| H | 3.18941858925401  | -1.28883847533237 | -3.05003826533780 |
| H | 4.56769921139587  | -0.98496963222936 | -1.97447626472632 |
| H | -6.37056294758323 | 2.40857865826606  | 1.17046254694816  |
| H | -7.56616642042209 | 1.32865051293173  | 2.85398761742173  |
| O | 4.95622917752440  | -2.78599097025933 | -0.23723042049938 |
| O | 6.85077241221447  | -1.71511968607999 | 0.24330015495551  |
| O | -0.85487522847196 | 0.20258913998211  | 2.04448789764089  |
| C | 5.79879159431999  | -2.12606012350029 | 0.67377530147026  |
| C | 5.29504817104756  | -1.98749672929973 | 2.01554041757994  |
| H | 5.94114500041192  | -1.44799083870568 | 2.69938223703745  |
| C | 4.08548784962502  | -2.47136058626789 | 2.40728735016243  |
| C | 3.26869127379334  | -3.16922310251133 | 1.45002585716775  |
| C | 2.01427913277543  | -3.74047958418512 | 1.73492062097772  |
| H | 1.62106139665939  | -3.68297750556496 | 2.74506996728698  |
| C | 1.26449965877678  | -4.35816143945788 | 0.75622486235711  |
| H | -2.93114642344887 | 0.98291567413776  | 0.74997765122664  |
| C | 1.74286294659412  | -4.40607541226019 | -0.56385260107687 |
| C | 2.99056755948560  | -3.87216206783148 | -0.87771481164942 |
| H | 3.38227060960547  | -3.91347112458932 | -1.88893891818214 |
| C | 3.73784421808219  | -3.27646945690283 | 0.12712517004345  |
| C | 3.58672083725464  | -2.25580584204404 | 3.80159589353314  |
| H | 3.35099223677475  | -3.20805493844029 | 4.28985196551594  |
| H | 2.67070171489392  | -1.65389355138544 | 3.78064807795613  |
| H | 4.32953284227801  | -1.73006522309153 | 4.40427944420304  |
| O | -4.22163139743133 | 3.46589923087900  | 0.33766204707684  |
| O | -2.98318924314516 | 4.33458853379495  | -1.28600477981376 |
| C | -3.03255810658093 | 4.02954449268646  | -0.10525281666530 |
| O | -6.91936403856041 | 1.27677387713747  | 3.56800387924201  |
| C | -1.98416302636243 | 4.17591379555639  | 0.86136193908603  |
| H | -1.09084361099151 | 4.68724954642521  | 0.51999872416998  |
| C | -2.06395652134732 | 3.65353973425702  | 2.11741189273120  |
| C | -3.28782828847420 | 3.01678290295353  | 2.52113066500160  |
| C | -3.50010776920161 | 2.42594919492168  | 3.78092486043764  |
| H | -2.69225733650478 | 2.41544429248121  | 4.50447764155023  |
| C | -4.70719842921855 | 1.85312354348584  | 4.11273786323355  |
| H | -4.86979284961776 | 1.39604840588861  | 5.08256173912465  |
| C | -5.75422377144898 | 1.85219669598552  | 3.17813252851058  |
| C | -5.58147582008324 | 2.41149961867767  | 1.91705863113858  |
| C | -4.35285520372005 | 2.97864260581985  | 1.60440811120175  |
| C | -0.89898279120359 | 3.71662962334972  | 3.05021003309862  |
| H | -0.54696282203579 | 2.70149057385930  | 3.26815945722318  |
| H | -1.17471551028802 | 4.18763885555213  | 4.00016919633120  |
| H | -0.07183567176651 | 4.27358635174571  | 2.60715110750192  |
| H | 0.11582166713647  | 0.18349201525435  | 2.18515984169055  |

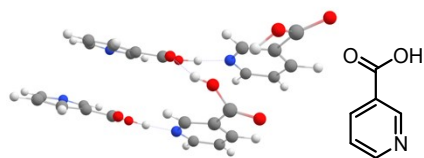

Main article molecule number: **8-tetramer (Fig. S3)**

Name: Nicotinic acid

Qty of copies of the molecule modelled: 4

Qty of imaginary frequencies: 0

Final single point energy (Eh): -1747.20228741639

|   |                   |                   |                   |
|---|-------------------|-------------------|-------------------|
| C | 2.08604908674806  | -0.16972819730039 | -0.42357539944725 |
| N | 3.02392817160574  | 0.66572832365174  | 0.03664682670201  |
| C | 4.15186904256734  | 0.15505657874037  | 0.54063498391872  |
| H | 4.87785822672570  | 0.87162875843367  | 0.92076173270209  |
| C | 4.40750555884967  | -1.21168960467991 | 0.57639021808388  |
| H | 5.34886503075044  | -1.58073229789578 | 0.97042778556968  |
| C | 3.43727306734758  | -2.07983422525584 | 0.10169851864608  |
| H | 3.57675160159891  | -3.15680371217473 | 0.10420886814043  |
| C | 2.23906401456604  | -1.55464829083813 | -0.38394678738695 |
| C | 1.18419112108381  | -2.50699199243203 | -0.83817649664833 |
| O | 1.43416952239089  | -3.64725957275473 | -1.15439667226317 |
| O | -0.09024677208545 | -2.06298778052759 | -0.85553189236326 |
| H | -0.23772020044841 | -1.23110705249151 | -0.33310378088114 |
| H | 1.21002209680369  | 0.31255115354722  | -0.85464831347846 |
| C | 0.71279747668751  | 4.80365535998595  | -0.83708779138063 |
| C | 1.07194906145850  | 5.78586828002614  | 0.08994324157846  |
| H | 1.78473144103730  | 5.55501374426472  | 0.87815964200647  |
| N | 0.56469464333318  | 7.02130708320577  | 0.08190122318581  |
| C | -0.32185988412609 | 7.31675767698716  | -0.87443449773216 |
| H | -0.71652449483893 | 8.33276931571320  | -0.86380605439435 |
| C | -0.74181329293737 | 6.41095623691880  | -1.84609996281542 |
| H | -1.46359506692712 | 6.71050838202128  | -2.60003170816336 |
| C | 1.24807844153569  | 3.41767788051793  | -0.78095916720478 |
| O | 2.25368825831083  | 3.26991098132141  | 0.07937295499517  |
| H | 2.56461832753219  | 2.30553776715070  | 0.05055997585395  |
| O | 0.78947044654810  | 2.51105583232186  | -1.45944485679254 |
| C | -0.21846758209377 | 5.12829403170017  | -1.82243176238237 |
| H | -0.51265656315449 | 4.36973659504706  | -2.54176218582421 |
| C | -0.17059317542353 | -2.90961542129358 | 2.00773703503657  |
| H | -1.07216608753344 | -2.41985225992443 | 1.64514161102113  |
| N | 0.70044285267571  | -2.12780595368303 | 2.65681596629585  |
| C | 1.81805279405305  | -2.67794364463558 | 3.14508111642814  |
| H | 2.50739705890857  | -2.00362647150927 | 3.64965711519483  |
| C | 2.09767916407257  | -4.03356164888755 | 3.02078771215267  |
| C | 1.19796058737125  | -4.84217249839252 | 2.34130365579679  |
| H | 1.36733046762484  | -5.90710081797559 | 2.21316949178681  |
| H | 3.00898869270479  | -4.44199404209312 | 3.44536905818603  |
| C | 0.04855370422794  | -4.26815654794508 | 1.80071764352684  |
| C | -0.92783041460601 | -5.12934975743413 | 1.05563881631064  |
| O | -1.56170941473870 | -4.55954294479102 | 0.01587287067786  |
| H | -1.11220831142073 | -3.74584243850006 | -0.28213504393025 |
| O | -1.14993945601507 | -6.26633573736150 | 1.39033860967291  |
| C | -0.52827107390030 | 0.81037258021994  | 1.52411345018798  |
| O | -0.88231840339310 | 0.01907747151929  | 0.64430823997013  |
| O | 0.25560674049457  | 0.48754118143190  | 2.53340342957447  |
| H | 0.44174821516505  | -0.52636585157031 | 2.55259221658751  |
| C | -0.98701656109567 | 2.21809042975906  | 1.53381683991412  |
| C | -1.90410182727570 | 2.65077459619531  | 0.57514583096391  |
| H | -2.24808573258714 | 1.95790479395595  | -0.18590683070560 |
| C | -2.34422135751557 | 3.96293175142316  | 0.62728204279643  |
| H | -3.05770872486995 | 4.34447325571989  | -0.09615791551247 |
| C | -1.84017568901251 | 4.79713871546396  | 1.62250658021810  |
| H | -2.15855832987157 | 5.83745676665419  | 1.68186680171967  |
| N | -0.94975100162502 | 4.40266267370855  | 2.53966592745393  |
| C | -0.53960539626690 | 3.13479024121537  | 2.49161745546892  |
| H | 0.18179989898281  | 2.82498032352557  | 3.24427163098154  |

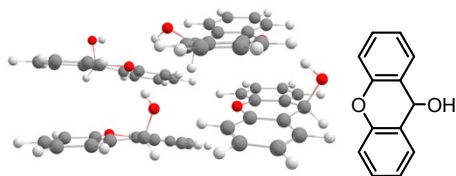

Main article molecule number: **9-tetramer (Fig. S3)**

Name: Xanthidrol

Qty of copies of the molecule modelled: 4

Qty of imaginary frequencies: 0

Final single point energy (Eh): -2606.95219290775

|   |                   |                    |                   |
|---|-------------------|--------------------|-------------------|
| C | -2.59641425692356 | -7.90307608244394  | 2.80959184314864  |
| C | -1.24339602276824 | -7.62399473114304  | 2.91365538316070  |
| C | -0.36375810463026 | -8.64323709022311  | 3.26317235243801  |
| C | -0.80367423788139 | -9.94016442967315  | 3.50601422954516  |
| C | -2.16857743373156 | -10.20309367582202 | 3.35978434424925  |
| C | -3.06502165687405 | -9.19875565203448  | 3.02416758211918  |
| C | 0.13725110617374  | -10.99758919686118 | 4.00722995536729  |
| C | 1.56861873575521  | -10.60065069739054 | 3.81187582192401  |
| C | 1.91832427102364  | -9.28141753704208  | 3.55146723767407  |
| C | 3.24569606624167  | -8.87235180353452  | 3.47218419574708  |
| H | 3.47600989494462  | -7.83131943427172  | 3.26547669935867  |
| C | 4.24830287603885  | -9.81103156553367  | 3.65552799970445  |
| C | 3.92757292643806  | -11.14415058819861 | 3.91022358666415  |
| C | 2.59748004895377  | -11.52765738552631 | 3.98699395350128  |
| H | -3.28567552258983 | -7.10856181523951  | 2.54018037139225  |
| H | -0.85723432161216 | -6.62803455284122  | 2.71960595383804  |
| H | -2.52541158587013 | -11.21936437032122 | 3.52046431749591  |
| H | -4.12201870827119 | -9.42238692254298  | 2.92075551420439  |
| H | 5.28615651892162  | -9.50013202739538  | 3.58909469126092  |
| H | 4.71513503750951  | -11.87764152351343 | 4.05083326581605  |
| H | 2.33282064628857  | -12.55855981630365 | 4.20773245708009  |
| O | 0.96927771429654  | -8.29110753279854  | 3.34320229398582  |
| O | -0.02981504588850 | -11.20071838938207 | 5.43046812940516  |
| H | -0.97625265611985 | -11.27394583868903 | 5.60735736444580  |
| H | -0.06251867308968 | -11.94832559660340 | 3.48444203658734  |
| C | 4.39291880214412  | -10.79276092719839 | 0.26325985771526  |
| C | 3.02056940439351  | -10.95303947505163 | 0.35135279431346  |
| C | 2.19247489446361  | -9.84496240096821  | 0.18236830479683  |
| C | 2.71580772579707  | -8.57598683783193  | -0.06121656945586 |
| C | 4.10385244927231  | -8.44237574511123  | -0.15063699253349 |
| C | 4.94196828828617  | -9.53502500184865  | 0.00553020542266  |
| C | 1.82044832030018  | -7.37275707324437  | -0.13415734944417 |
| C | 0.38528958933585  | -7.77418944014115  | -0.32039029818594 |
| C | -0.02870019793755 | -9.08511600913765  | -0.08683085003532 |
| C | -1.36664220520198 | -9.45678664183140  | -0.20355985225584 |
| H | -1.64541145150231 | -10.48750055323605 | -0.00962057332149 |
| C | -2.30610841705675 | -8.50238105579011  | -0.55633278522382 |
| C | -1.91808711440137 | -7.18202653173658  | -0.79339485386966 |
| C | -0.58252299889816 | -6.82922309274303  | -0.67347305837576 |
| H | 5.04056146407599  | -11.65444785157513 | 0.39544419584150  |
| H | 2.57081129745643  | -11.92017833961395 | 0.55113605085302  |
| H | 4.51677066123515  | -7.45259573675018  | -0.33090737821331 |
| H | 6.01796064460358  | -9.41330722250754  | -0.07037635165399 |
| H | -3.34980101189730 | -8.78922895921371  | -0.64695040957157 |
| H | -2.65488768872287 | -6.43388433898615  | -1.06945008818973 |
| H | -0.27003859446944 | -5.80051773980138  | -0.83677518547885 |
| O | 0.84296221942625  | -10.08668278866520 | 0.26708432902707  |
| O | 1.98124765928047  | -6.54420114842190  | 1.04274041910311  |
| H | 1.69679489624030  | -7.08203376444604  | 1.79724319992289  |
| H | 2.13436291966083  | -6.71681486642927  | -0.95651744294713 |
| C | -2.61188967200425 | -2.78664352435432  | 4.99858035327122  |
| C | -1.69488355495439 | -2.01328015622914  | 4.30309880946937  |
| C | -0.49380625279240 | -2.58623722021195  | 3.89814173471092  |
| C | -0.18683033434863 | -3.91893892417387  | 4.16254473389734  |
| C | -1.10984065351302 | -4.66478880604710  | 4.89547224671870  |
| C | -2.31570311522840 | -4.11268849854966  | 5.30835533712668  |
| C | 1.06971210584715  | -4.53869630606783  | 3.59510537831923  |
| C | 2.08489321493107  | -3.47451033223903  | 3.27388068231157  |
| C | 1.68518162786674  | -2.15739701718981  | 3.06658362798893  |
| C | 2.58398459470826  | -1.16921465352783  | 2.68016132341598  |
| H | 2.22526123739277  | -0.15693730397684  | 2.52132595904502  |



|   |                   |                   |                   |
|---|-------------------|-------------------|-------------------|
| C | 3.91639916095104  | -1.50508246094822 | 2.49416286583535  |
| C | 4.34471118970582  | -2.81446365200343 | 2.70646380849739  |
| C | 3.43196749429321  | -3.78603973005467 | 3.09365026145521  |
| H | -3.55485455534600 | -2.34717065877843 | 5.30959483563739  |
| H | -1.89453529201933 | -0.97324055839069 | 4.06382282841575  |
| H | -0.87035450342694 | -5.69380001138591 | 5.14763026102423  |
| H | -3.02171009634780 | -4.71433290828942 | 5.87248365171315  |
| H | 4.62166991243641  | -0.74002539490146 | 2.18373090769565  |
| H | 5.38900310058451  | -3.07632887589694 | 2.56641116185812  |
| H | 3.74674965420410  | -4.81092389429922 | 3.26041491098611  |
| O | 0.36889906733335  | -1.75897460519777 | 3.20718601610848  |
| O | 1.65183876748460  | -5.50515263343252 | 4.47298067351774  |
| H | 1.31984879372221  | -6.38045856871550 | 4.23687107474220  |
| H | 0.80655686451274  | -5.02773786671942 | 2.63980177526874  |
| C | 2.81672749673242  | -2.50691969344728 | -0.80869629784497 |
| C | 1.84745155117400  | -3.28654638341556 | -0.20026798634255 |
| C | 0.60062350174435  | -2.72540444415861 | 0.07212585992347  |
| C | 0.31129019704822  | -1.39631467524676 | -0.22669124328114 |
| C | 1.30680313503712  | -0.63506787290440 | -0.84618578649134 |
| C | 2.54639262505344  | -1.17857244509347 | -1.14465673863281 |
| C | -0.98520278103406 | -0.76299772773782 | 0.19977376232883  |
| C | -1.98138821434731 | -1.80514026320077 | 0.63056179790289  |
| C | -1.59300892453239 | -3.12161364158348 | 0.86878631636820  |
| C | -2.49520892599676 | -4.07389936757706 | 1.34182050219557  |
| H | -2.14553763186286 | -5.08893531894666 | 1.49995893038420  |
| C | -3.80552781880319 | -3.70398914564299 | 1.59142559842031  |
| C | -4.22081297435576 | -2.39070607958306 | 1.36127309483761  |
| C | -3.31163268725277 | -1.45937170690212 | 0.88444765623522  |
| H | 3.79424713101875  | -2.93413993508137 | -1.01208324031434 |
| H | 2.03916585535565  | -4.31081492766974 | 0.10570352874515  |
| H | 1.09374249364695  | 0.40732742129386  | -1.07081846823439 |
| H | 3.30675214462130  | -0.57033765641907 | -1.62473784958155 |
| H | -4.50846460133485 | -4.44033419485842 | 1.97029893644433  |
| H | -5.24849308108914 | -2.10017527651792 | 1.55560678063617  |
| H | -3.61644302358999 | -0.42903410313662 | 0.71720589149634  |
| O | -0.31116720646941 | -3.56734590109285 | 0.66732352600748  |
| O | -0.76771150172965 | 0.20594287639332  | 1.24478949686894  |
| H | -0.38323159608668 | -0.28353596221570 | 1.98890556977434  |
| H | -1.40155309116006 | -0.16954721606078 | -0.62480575523131 |

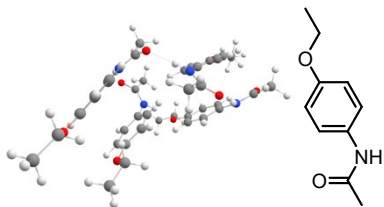

Main article molecule number: **10-tetramer (Fig. S3)**

Name: Phenacetin

Qty of copies of the molecule modelled: 4

Qty of imaginary frequencies: 0

Final single point energy (Eh): -2375.99581495721

|   |                    |                    |                   |
|---|--------------------|--------------------|-------------------|
| C | -8.46280223048587  | -4.29939387241979  | 0.55671470380065  |
| C | -9.34319384904881  | -4.35626397404574  | 1.64597457327447  |
| C | -7.10990460924323  | -4.10155437325201  | 0.75099016158775  |
| H | -8.85666752569692  | -4.389397766642934 | -0.45288417158600 |
| C | -8.83473592786736  | -4.20716702410877  | 2.93596478940328  |
| N | -10.69981830956513 | -4.60454556317742  | 1.35850235495026  |
| C | -6.59860387903365  | -3.95570971201344  | 2.04384696515711  |
| H | -6.42908455971076  | -4.04576143159942  | -0.09233872818007 |
| C | -7.46863704839124  | -4.00562409001812  | 3.13268204676560  |
| H | -9.49961310700816  | -4.25394351435895  | 3.78740849837345  |
| C | -11.76930627338321 | -4.49902536485619  | 2.18792703985869  |
| H | -10.91699021565816 | -4.73874297099427  | 0.37328231828283  |
| O | -5.24762952993204  | -3.76382572760992  | 2.13415358443436  |
| H | -7.10535919615034  | -3.89869794966299  | 4.14839612927564  |
| C | -13.07477699337782 | -4.99160765450581  | 1.60642504589341  |
| O | -11.70266834670417 | -4.08252676937708  | 3.35192330303721  |
| C | -4.67282856870896  | -3.68817846593644  | 3.44153157560480  |

|   |                    |                   |                   |
|---|--------------------|-------------------|-------------------|
| H | -13.89299788888182 | -4.36309213345244 | 1.96460453421253  |
| H | -13.07086837682134 | -5.02807296125448 | 0.51380969656015  |
| H | -13.24592186354779 | -6.00566904635643 | 1.98621099995741  |
| C | -3.17303769284790  | -3.58369977442923 | 3.27576200908901  |
| H | -5.07307064199988  | -2.81047261490682 | 3.97420968292855  |
| H | -4.93998965670949  | -4.58739011631972 | 4.01722543226357  |
| H | -2.90365771317200  | -2.68929023674998 | 2.70691977005874  |
| H | -2.69411425680423  | -3.52608157046005 | 4.25807393582333  |
| H | -2.78310227495174  | -4.45928641680557 | 2.74918484686588  |
| C | -5.06686154353109  | -0.16883824476250 | 2.07317635371195  |
| C | -6.55219321789063  | -0.37985045588142 | 1.88775181458290  |
| H | -4.51979095256705  | -1.05174147136965 | 1.73144158770640  |
| H | -4.84295580699850  | -0.00201475618473 | 3.13173946199929  |
| H | -4.72281589923581  | 0.70011656143071  | 1.50483992908452  |
| O | -6.76999153424730  | -0.62342100003944 | 0.49167656061467  |
| H | -6.90526221037251  | -1.24595544782524 | 2.46735680925146  |
| H | -7.12324155211122  | 0.50760158690891  | 2.20099408564974  |
| C | -8.03074152640429  | -0.91685419609105 | 0.08337264329421  |
| C | -9.14871741760954  | -0.94442125682422 | 0.92001207444660  |
| C | -8.17156557503749  | -1.21547964678890 | -1.27698448692358 |
| C | -10.39190359965782 | -1.27632089149697 | 0.39095023729684  |
| H | -9.06704852528367  | -0.73611382686489 | 1.98005326247845  |
| C | -9.41322263712058  | -1.54444215176566 | -1.79083657640366 |
| H | -7.28951060016435  | -1.19137090412300 | -1.90901642486468 |
| C | -10.53245390458469 | -1.57636314118714 | -0.95829000830172 |
| H | -11.26191194691728 | -1.29304484981975 | 1.04122986973274  |
| H | -9.52545611341047  | -1.78093816377857 | -2.84502080026343 |
| N | -11.82339137824151 | -1.87204120264253 | -1.50006575708939 |
| C | -12.29076884904851 | -3.13159396932191 | -1.67825698222712 |
| H | -12.39999833299488 | -1.09356315640781 | -1.80686770257754 |
| C | -13.68738972962785 | -3.22739493046222 | -2.25314724173368 |
| O | -11.65128330880547 | -4.14603670616760 | -1.39051855977558 |
| H | -13.65253358204312 | -3.82726421655225 | -3.16691389329712 |
| H | -14.13732279491629 | -2.25420556927883 | -2.46918380322756 |
| H | -14.31998429183730 | -3.76151254079956 | -1.53716459152977 |
| C | -13.04979947548747 | 1.63467024493939  | 0.97438489893417  |
| C | -14.35922959131813 | 2.00068942415149  | 1.32016349186604  |
| C | -12.74505464264869 | 1.22823890942037  | -0.30932301916228 |
| H | -12.27062133050900 | 1.65787646697378  | 1.73186772767236  |
| C | -15.34435395010125 | 1.99714471557648  | 0.33103709546084  |
| N | -14.58772089745495 | 2.30631523031263  | 2.67163766659314  |
| C | -13.74992010186482 | 1.15703715053572  | -1.27443362896971 |
| H | -11.72775572982315 | 0.95497692684968  | -0.57301008355003 |
| C | -15.04141745546847 | 1.56720012649081  | -0.96052653935748 |
| H | -16.35177244377419 | 2.30158251107226  | 0.57874972985396  |
| C | -15.76027394724420 | 2.67797376892032  | 3.26420456866898  |
| H | -13.86519683596981 | 1.95173047891923  | 3.29606711756863  |
| O | -13.35736176662063 | 0.64716936215644  | -2.49577431816495 |
| H | -15.83740437917508 | 1.54482030417595  | -1.69604753735096 |
| C | -15.68758488222848 | 2.76629959558690  | 4.77593638623035  |
| O | -16.79617808963418 | 2.94292119642855  | 2.65967843446759  |
| C | -14.31756360004735 | 0.64099211732834  | -3.55843340779777 |
| H | -16.53431463876088 | 2.21514702936175  | 5.19480074009390  |
| H | -14.75409492861363 | 2.38090226795269  | 5.19522767688921  |
| H | -15.80792887915745 | 3.81427364159832  | 5.06863534949404  |
| C | -13.63061023625217 | 0.08188378158045  | -4.78466336543260 |
| H | -15.18569234357183 | 0.02529971870089  | -3.27490745048688 |
| H | -14.67217717116876 | 1.66693590455864  | -3.73563481302982 |
| H | -13.27134740877804 | -0.93588355963903 | -4.60092649934509 |
| H | -14.33191042337842 | 0.05273939886536  | -5.62399376646321 |
| H | -12.77606619963989 | 0.70377827355041  | -5.06563169086234 |
| C | -19.77747159185600 | 0.38681076437676  | 0.35527512559916  |
| C | -18.75295837216353 | 0.12855874061432  | 1.43664467049793  |
| H | -19.33731368192174 | 0.96875308413573  | -0.45990132410798 |
| H | -20.61617884826549 | 0.95449375940445  | 0.76964208177505  |
| H | -20.16043955266332 | -0.55296902026705 | -0.05350541896496 |
| O | -17.68765019425228 | -0.63151260291450 | 0.83938563673517  |
| H | -18.35077785497053 | 1.06970670802759  | 1.83726923124412  |
| H | -19.19400704580405 | -0.44793737091601 | 2.26408735428009  |
| C | -16.57171400278109 | -0.84705459241079 | 1.58483185598156  |
| C | -16.44299528968892 | -0.50892471274707 | 2.93386612296388  |
| C | -15.49535669625445 | -1.43804930598128 | 0.91423841771166  |
| C | -15.23030272120826 | -0.71540324951172 | 3.58370183626415  |
| H | -17.26614540534463 | -0.06396396990389 | 3.47973929559411  |
| C | -14.28935156950775 | -1.62120437130985 | 1.56505342021572  |
| H | -15.61198841021594 | -1.69294955152756 | -0.13423706188166 |
| C | -14.14143412340390 | -1.24644996821223 | 2.90338537145273  |
| H | -15.12363077297221 | -0.44061228607494 | 4.62834770091334  |
| H | -13.44235113995727 | -2.03137810025231 | 1.02118292447192  |
| N | -12.88433741556944 | -1.41724945584728 | 3.54609383095650  |
| C | -12.20308060574670 | -0.42562326559347 | 4.17478461491556  |
| H | -12.46623245787268 | -2.34863717089186 | 3.52700126496250  |

|   |                    |                   |                  |
|---|--------------------|-------------------|------------------|
| C | -10.89198441860913 | -0.85439193227732 | 4.79731202205880 |
| O | -12.59421024942108 | 0.74258443367142  | 4.25884546295933 |
| H | -10.13883783943508 | -0.09408713011302 | 4.57512032961035 |
| H | -10.55286521745306 | -1.83603385148523 | 4.45395017532319 |
| H | -11.01520580759064 | -0.88213492516222 | 5.88517833531889 |

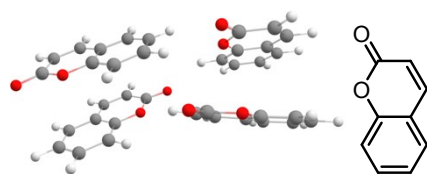

Main article molecule number: **11-tetramer (Fig. S3)**

Name: Coumarin

Qty of copies of the molecule modelled: 4

Qty of imaginary frequencies: 0

Final single point energy (Eh): -1987.78320779229

|   |                   |                   |                   |
|---|-------------------|-------------------|-------------------|
| O | -0.52649978190481 | -0.36654105560700 | -2.32504607663384 |
| O | -0.38017436948922 | -2.19478362112380 | -1.06633508072037 |
| H | -1.09725583547388 | 2.12008902286366  | -2.65211288538839 |
| O | 2.77589416248145  | 1.98924507241058  | -3.76788130790817 |
| O | 3.30796897889251  | 2.08055757279055  | -5.93180252188945 |
| C | 0.10476500543191  | -1.14779021337929 | 3.24838053162052  |
| C | -2.53240396189601 | 1.45482270404537  | 3.00544198185091  |
| C | -0.12135112930784 | -0.15037143552916 | 5.44866184400064  |
| C | -2.11650605170932 | 0.09940933866618  | 1.03284712159611  |
| C | -0.10772052611698 | -2.15617776599420 | 2.31438887011444  |
| C | -3.07736739384770 | 1.66676886602462  | 4.26800776230870  |
| C | -0.36248676831252 | -1.25372636575437 | 4.56809651344271  |
| C | -2.74766459335310 | 0.25246001874719  | 2.31101626524080  |
| C | -1.04965856188414 | -2.41923951875119 | 4.94135686127675  |
| C | -3.53342228029394 | -0.73999882007977 | 2.91636238995546  |
| C | 1.04462797736089  | 1.04922395294888  | 3.66715026276647  |
| C | -1.19188440903409 | 2.35805249635416  | 1.20526033544334  |
| C | 0.54543525409854  | 0.94413365824545  | 5.02270389595765  |
| C | -1.36555800086029 | 1.09504239162387  | 0.51935292891905  |
| C | -0.79484694321692 | -3.29349411030613 | 2.71140805695164  |
| C | -3.84715604962776 | 0.66691696263330  | 4.84427209906422  |
| C | -1.26283324904434 | -3.43152571013057 | 4.02362686312664  |
| C | -4.07866494257265 | -0.53728366280661 | 4.17106544095073  |
| H | 0.73947275996990  | 1.79805715169772  | 5.66138298913958  |
| H | -0.84979746498931 | 0.99172660463297  | -0.42592078940683 |
| H | -0.97008985765604 | -4.08199303905051 | 1.98531152828268  |
| H | -4.27737729973875 | 0.82770953711782  | 5.82857017308603  |
| H | -1.79647817224214 | -4.32968627529846 | 4.31806575777632  |
| H | -4.68129815016851 | -1.31193782233365 | 4.63455084383129  |
| H | 1.84538344270126  | 3.02665026170160  | -1.60357405571651 |
| H | -0.49198007154340 | -0.20761610200019 | 6.46982452066473  |
| H | -2.22260113393789 | -0.83743303328707 | 0.49049101868118  |
| H | -1.41849843275746 | -2.50678549873040 | 5.96004891042752  |
| H | -3.68942008416146 | -1.67607830932752 | 2.38716663001463  |
| C | -0.36578606211484 | 0.29471886891478  | -3.51126296442060 |
| C | 0.50097443944355  | -1.74099178247596 | -4.50072027643542 |
| C | -0.72020458843723 | 1.63775559314437  | -3.54829821163827 |
| C | 0.14354354420068  | -0.36331565694886 | -4.64159825642623 |
| C | 0.29695259645153  | 0.36956035383203  | -5.83027705770879 |
| C | -0.18657847469867 | -1.70356056430826 | -2.15843734486051 |
| C | 0.35188563499909  | -2.37940453314260 | -3.31813472372545 |
| C | -0.55175277083404 | 2.33634305762988  | -4.73411621284021 |
| C | -0.04456034817383 | 1.70702294835918  | -5.87618931117455 |
| H | 0.61533354377830  | -3.42143981612780 | -3.17783297429080 |
| H | -0.80510884520054 | 3.39131201889046  | -4.76805729372430 |
| H | 0.10665054831473  | 2.27539268529634  | -6.78711407590896 |
| H | 0.90349837386102  | -2.26551718472052 | -5.36460971832378 |
| H | 0.71089053123385  | -0.12575202677902 | -6.70459784485584 |
| O | 0.77692937484176  | -0.03909190330764 | 2.82647904558383  |
| O | -1.78063446215130 | 2.46023150068974  | 2.47329177341446  |
| O | 1.66111554593926  | 1.97201038346254  | 3.19371417902523  |
| O | -0.59423583915280 | 3.32071506822731  | 0.78877973878978  |

|   |                   |                   |                   |
|---|-------------------|-------------------|-------------------|
| C | 2.68886272240977  | 1.31295437856199  | -2.58404316490694 |
| C | 3.66669424232699  | -0.63854365873608 | -3.64335765120076 |
| C | 2.16596382690408  | 1.99610398258243  | -1.49082113051423 |
| C | 3.11504574717725  | -0.02217832486660 | -2.47672311291800 |
| C | 2.99286246685414  | -0.66705179296916 | -1.23401407468129 |
| C | 3.29149005622926  | 1.40900129948188  | -4.92715757539090 |
| C | 3.75747256773854  | 0.04119746242234  | -4.80760398003690 |
| C | 2.07143446875303  | 1.34072709656193  | -0.27162131366365 |
| C | 2.47897315986018  | 0.00703707033418  | -0.14324380504221 |
| H | 4.17649503705383  | -0.39245298789831 | -5.70858857513693 |
| H | 1.68516017602755  | 1.87087326849296  | 0.59387641058327  |
| H | 2.39306920106005  | -0.48442494187134 | 0.81940091499270  |
| H | 0.23333861713023  | -2.02772631688853 | 1.29191771956488  |
| H | -2.88718010133113 | 2.60759274875760  | 4.77418737894086  |
| H | 4.01596221134924  | -1.66695194345274 | -3.57419606572852 |
| H | 3.31579825179622  | -1.70175602998488 | -1.14615293164734 |

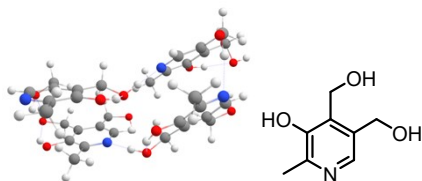

Main article molecule number: **12-tetramer (Fig. S3)**

Name: Pyrixodine

Qty of copies of the molecule modelled: 4

Qty of imaginary frequencies: 0

Final single point energy (Eh): -2367.20657566562

|   |                   |                   |                   |
|---|-------------------|-------------------|-------------------|
| N | -1.17945630653381 | 1.89435185790149  | -4.51262055297189 |
| C | 0.78006123610862  | 1.50799813520581  | -2.54876054599901 |
| C | -0.28169030954537 | 2.39775920660253  | -2.35366114885554 |
| C | -1.25844835054274 | 2.55293441283719  | -3.35626413438995 |
| C | -0.13284078426185 | 1.07967063360606  | -4.72753061302894 |
| C | 0.85558669845152  | 0.84268667785810  | -3.78504083843757 |
| C | 1.77415600721939  | 1.18742076575421  | -1.45836539910358 |
| C | 1.97724949862428  | -0.13628916109015 | -4.06559053681466 |
| C | -2.43092959204328 | 3.45130084965158  | -3.11085812041065 |
| O | -0.46134453820500 | 3.11199336238227  | -1.22201936488371 |
| O | 1.83351258873699  | 2.19278777560951  | -0.44806600306789 |
| O | 1.92126381394648  | -0.74534743449902 | -5.34373364011768 |
| H | 0.32772209793960  | 2.92598743392710  | -0.65553247945325 |
| H | 1.92590055617451  | 1.73637488874379  | 0.43310620982293  |
| H | 1.21932064760365  | -1.41107976070895 | -5.35415974994496 |
| H | 1.47941648522853  | 0.22082115834093  | -1.01436710389881 |
| H | 2.77582525315992  | 1.05450145502677  | -1.89673918367703 |
| H | 2.94063515951769  | 0.39088849666247  | -4.03035837171870 |
| H | 2.00723291941790  | -0.89956811432212 | -3.26751600117775 |
| H | -0.08788013223727 | 0.58961916433818  | -5.69655820913568 |
| H | -2.09721358350511 | 4.47456011723476  | -2.90611112435621 |
| H | -2.99403604901875 | 3.13218444982508  | -2.22585489699400 |
| H | -3.09022970703259 | 3.45402445507809  | -3.98118116802838 |
| N | -1.26363769714941 | -1.16147111580778 | -1.62263589622344 |
| C | -1.23645143344504 | -2.40100203766176 | -4.10710453874481 |
| C | -0.35529003187024 | -2.78774181095365 | -3.09221767364881 |
| C | -0.39171478771477 | -2.14827091084365 | -1.84570084201874 |
| C | -2.10213765327992 | -0.77056129828308 | -2.59157881642076 |
| C | -2.12738921245930 | -1.34857201201528 | -3.85473134585089 |
| C | -1.20855283558343 | -3.14719770002614 | -5.41026116145790 |
| C | -3.07949849372837 | -0.81898621982091 | -4.91504855868519 |
| C | 0.53843064555086  | -2.57180012255867 | -0.75183483359825 |
| O | 0.55553059261454  | -3.78902705298914 | -3.24155514472093 |
| O | 0.16565887940097  | -3.17091063352944 | -5.87252742539560 |
| O | -3.64662738879161 | 0.42868224039285  | -4.59801809456655 |
| H | 0.71114653589056  | -3.92390069326296 | -4.19200850989163 |
| H | 0.20861374210250  | -3.62244541458744 | -6.72358948103967 |
| H | -2.92914416035289 | 1.09147811834123  | -4.70072112304600 |
| H | -1.84977383057545 | -2.67361668557234 | -6.15960436969799 |
| H | -1.56238564032760 | -4.17916994352448 | -5.25468665432757 |
| H | -3.91197068947262 | -1.52569646641886 | -5.04665129134593 |

|   |                   |                   |                   |
|---|-------------------|-------------------|-------------------|
| H | -2.54732230335680 | -0.77006183371784 | -5.88049634725446 |
| H | 2.73269046550816  | -0.77833895819123 | 0.69730127728322  |
| H | 1.58050044987643  | -2.56928001512659 | -1.08714252626838 |
| H | 0.43913538329080  | -1.90912646631571 | 0.10986937725006  |
| H | 0.32798944856736  | -3.60016884133919 | -0.43569548191001 |
| N | 2.15416426148357  | 0.78495615912565  | 1.92474433772709  |
| N | -2.65050834853385 | 2.59120550003258  | 4.71414373308759  |
| C | 2.50599921062175  | -0.96627098414649 | 4.07320003086125  |
| C | -1.67973780956685 | 0.84322081624155  | 2.72660075649730  |
| C | 2.13721260582967  | 0.36788993732541  | 4.26934364165899  |
| C | -2.16257228938186 | 2.12248026957159  | 2.41248447275502  |
| C | 1.92527398587523  | 1.21775269907209  | 3.16399068889376  |
| C | -2.62870136821993 | 2.97159863705765  | 3.43931563849680  |
| C | 2.55505867305379  | -0.47990024739696 | 1.72616652766555  |
| C | -2.20636062148440 | 1.36802012702805  | 5.01964292180131  |
| C | 2.72633800273670  | -1.39426394181334 | 2.75263215263718  |
| C | -1.70461457960999 | 0.46748315112061  | 4.08278787978361  |
| C | 2.70693922101096  | -1.92589612932598 | 5.22919181783557  |
| C | -1.19377662429165 | -0.12264069838909 | 1.67080342605880  |
| C | 3.15223520610446  | -2.81738699526616 | 2.45421026812565  |
| C | -1.22275480469283 | -0.87864366709818 | 4.56520544351372  |
| C | 1.45576575070015  | 2.62192000195444  | 3.37270464242335  |
| C | -3.12849128718911 | 4.33952147785657  | 3.09064402368464  |
| O | 1.96693013256936  | 0.92102787401389  | 5.49998430487915  |
| O | -2.21980344623964 | 2.62874394041728  | 1.16274320058881  |
| O | 2.02467677591837  | -1.55650462367094 | 6.42731760020135  |
| O | -0.84407763329152 | 0.53241690754054  | 0.45837882927010  |
| O | 3.49860928649605  | -3.04081673640626 | 1.09462684879618  |
| O | -0.57840956033139 | -0.78409803637203 | 5.85276637508107  |
| H | 2.11388183500768  | 0.20657185822498  | 6.15935265496479  |
| H | -1.74083393466740 | 2.01236812328137  | 0.56394496117012  |
| H | 1.06018651588002  | -1.57938822123821 | 6.24531978084356  |
| H | -1.02934559977505 | -0.09772305024538 | -0.30099132408048 |
| H | 4.33205383400171  | -2.58899121831155 | 0.91749558664989  |
| H | -0.21632620254526 | 0.11412500844942  | 5.90479172710643  |
| H | 3.77383987071710  | -1.97322316094914 | 5.48951861751267  |
| H | -0.31310509722579 | -0.66077409397073 | 2.05867273221466  |
| H | 2.40859421898927  | -2.94027269426022 | 4.92739246255108  |
| H | -1.97519291802451 | -0.88046245876594 | 1.48296443866255  |
| H | 2.32045945913703  | -3.50502724628354 | 2.66024725966658  |
| H | -2.06348225782330 | -1.57223638969583 | 4.69709829710601  |
| H | 3.97936956455786  | -3.11371027119275 | 3.11987266530624  |
| H | -0.52819553954114 | -1.33385184121156 | 3.84652723636437  |
| H | -2.76771575740714 | 0.05748347514813  | -2.36469144563761 |
| H | -2.26242463548587 | 1.08720158640028  | 6.07058787373915  |
| H | 0.53640955644605  | 2.63825781721596  | 3.96917463892983  |
| H | -3.97448232456434 | 4.28024619976447  | 2.39663134676437  |
| H | 2.20170531210992  | 3.20442856865107  | 3.92531467697144  |
| H | -2.35305135972069 | 4.91908712641935  | 2.57737222326757  |
| H | 1.26457086648749  | 3.09990981957054  | 2.41000375693007  |
| H | -3.43594950248856 | 4.85651983756588  | 4.00079297843247  |

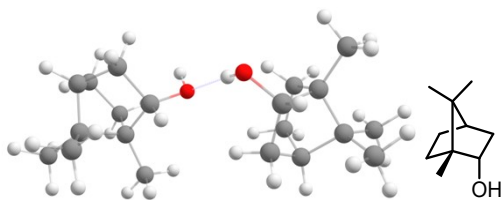

Main article molecule number: 14

Name: (+)-Borneol

Qty of copies of the molecule modelled: 2

Qty of imaginary frequencies: 0

Final single point energy (Eh): -934.027737487291

|   |                  |                   |                   |
|---|------------------|-------------------|-------------------|
| C | 8.56048217056175 | 30.47305324463541 | 12.37325635533960 |
| C | 7.65649321051954 | 31.36766116624389 | 11.47197315959708 |
| C | 7.43002756524891 | 32.62838470327893 | 12.32967848435894 |

|   |                   |                   |                   |
|---|-------------------|-------------------|-------------------|
| C | 6.44269339981910  | 32.23567350322636 | 13.44662587763084 |
| C | 9.98246368186839  | 33.02582801031762 | 12.19113326820860 |
| H | 8.13775840708660  | 31.59258611325870 | 10.51441918359997 |
| H | 6.71040634384473  | 30.86207944629359 | 11.24730760193095 |
| H | 5.57029788710522  | 31.71353957272662 | 13.04093100936392 |
| H | 6.89924906527913  | 30.30398158762947 | 14.44692357908500 |
| H | 10.06588394460707 | 32.34152233320101 | 11.34485591637998 |
| C | 8.69438417540663  | 31.30780257375048 | 13.67896417552949 |
| C | 7.30607502957606  | 31.31630613575802 | 14.35750388379800 |
| C | 8.77507006491868  | 32.75938936745310 | 13.09870884231950 |
| C | 8.77492924074204  | 33.85774056812726 | 14.16703323675632 |
| C | 9.82005631691821  | 30.84067509412919 | 14.57787279523328 |
| H | 6.07818676919420  | 33.11435920867336 | 13.98879242920977 |
| H | 7.38238004023267  | 31.70649804244302 | 15.37814053603473 |
| H | 9.92170785229649  | 34.04224003964940 | 11.78442123313732 |
| H | 10.91443328160982 | 32.96109940963032 | 12.76455592065151 |
| H | 10.78670803461034 | 30.87908916800247 | 14.06189549820201 |
| H | 9.88930708095932  | 31.45413032157741 | 15.48373188285598 |
| H | 9.65062582420213  | 29.80219816815357 | 14.88382208631840 |
| H | 7.99188340360725  | 33.74175243244760 | 14.91887767031668 |
| H | 9.73739311942518  | 33.87894805801076 | 14.69131021142737 |
| H | 7.13125466604429  | 33.51510610509534 | 11.75895190428879 |
| H | 8.63948776737630  | 34.83821031865843 | 13.69459812795904 |
| O | 8.10846970018531  | 29.13955743952584 | 12.55233732258850 |
| H | 7.16150526062860  | 29.15412027006018 | 12.76567025055556 |
| H | 9.55714352083867  | 30.35654237305275 | 11.93145288792804 |
| C | 5.04981458756098  | 28.19227701512389 | 11.45438212475766 |
| C | 5.08135658311395  | 26.65342619462755 | 11.65242731037923 |
| C | 3.79224152610478  | 26.18389343553724 | 10.94999132627492 |
| C | 2.61414014366452  | 26.58289568840383 | 11.86102290608539 |
| C | 4.81308775342076  | 27.10800089173679 | 8.75972727445817  |
| H | 5.98567142383107  | 26.21319000636325 | 11.22211047685279 |
| H | 5.08283055084879  | 26.39220351242298 | 12.71786539841439 |
| H | 2.78207676823199  | 26.25997023562440 | 12.89444183357953 |
| H | 2.70365503640400  | 28.66626524465398 | 12.65821578638097 |
| H | 5.80851032958885  | 27.15286105110331 | 9.20525797467408  |
| C | 3.71206731293107  | 28.44482880622726 | 10.71510267656745 |
| C | 2.57271521297378  | 28.13145759976707 | 11.71102499317823 |
| C | 3.66500747819697  | 27.19374505729930 | 9.77296847271717  |
| C | 2.36034674078584  | 27.06192426910820 | 8.98135768967545  |
| C | 3.62580013803420  | 29.81731057732508 | 10.08075603046844 |
| H | 1.67716066357753  | 26.12227436671456 | 11.53351143614235 |
| H | 1.61397594465266  | 28.47509926580674 | 11.30956874338280 |
| H | 4.74512285339090  | 26.16469236758413 | 8.20577412102291  |
| H | 4.73958230992084  | 27.92032866490067 | 8.02778625644841  |
| H | 4.44635637591382  | 29.98259251299320 | 9.37287657909183  |
| H | 2.67850074583268  | 29.95138810080203 | 9.54665465554755  |
| H | 3.69064731646458  | 30.59623195441455 | 10.84934151191773 |
| H | 1.46145926686149  | 27.16240800357377 | 9.59237680978661  |
| H | 2.31286967655887  | 27.82249615834663 | 8.19385865568348  |
| H | 3.79703636982020  | 25.12767200638795 | 10.66035689905386 |
| H | 2.32011373985843  | 26.08225499288401 | 8.49076287046202  |
| O | 5.21707354939251  | 28.95612829236482 | 12.65904806137662 |
| H | 4.68273591282034  | 28.55718542607142 | 13.35533818787065 |
| H | 5.88323686452961  | 28.52863352681429 | 10.82891760714153 |

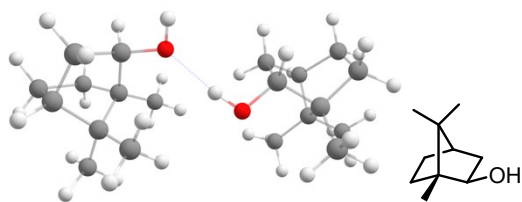

Main article molecule number: **15**

Name: (+)-Isoborneol

Qty of copies of the molecule modelled: 2

Qty of imaginary frequencies: 0

Final single point energy (Eh): -934.025723151241

C 13.16711733145648 27.94752308737340 13.26509871140271

S46

|   |                   |                   |                   |
|---|-------------------|-------------------|-------------------|
| C | 12.19069523607037 | 29.05517012729147 | 12.76516999292383 |
| C | 12.87540655074234 | 30.36220897405079 | 13.20826682490767 |
| C | 12.77163038304533 | 30.41922902632165 | 14.74655140274940 |
| C | 14.74426854354847 | 29.81148691241129 | 11.50758217962979 |
| H | 12.09323337350808 | 28.99235585761980 | 11.67722189337511 |
| H | 11.18603143326856 | 28.95347294153969 | 13.19067742209957 |
| H | 11.75013975282783 | 30.21278062051438 | 15.08363007314196 |
| H | 14.18064217330507 | 29.00095279351467 | 11.04788126780018 |
| C | 14.34297238916690 | 28.75876957483163 | 13.86762419698520 |
| C | 13.78056241858907 | 29.32273411057212 | 15.19644762822868 |
| C | 14.37845927957110 | 30.04862728063859 | 12.97696198099962 |
| C | 15.31887362841794 | 31.14126743923477 | 13.49943303193528 |
| C | 15.62823874511635 | 27.97279403141717 | 14.02140735184507 |
| H | 13.04420778460521 | 31.40523241510059 | 15.13575350688941 |
| H | 14.57955465131247 | 30.73110793826987 | 10.93233263418993 |
| H | 15.80694739503671 | 29.55716003264143 | 11.41883410634767 |
| H | 15.98627735013311 | 27.60469249121816 | 13.05639695759752 |
| H | 16.40925571587130 | 28.59215157607495 | 14.47742652755548 |
| H | 15.47251718278322 | 27.10072398098184 | 14.66769900963684 |
| H | 15.15752243524331 | 31.40594163531200 | 14.54614467079378 |
| H | 16.36347028348776 | 30.82744860186197 | 13.39281346652466 |
| H | 12.50112531539080 | 31.25741218482311 | 12.69880934497513 |
| H | 15.19226425125420 | 32.05319833701252 | 12.90392225505944 |
| H | 12.70416422819401 | 27.34116887074482 | 14.06250390886731 |
| H | 13.30999700025211 | 28.53322491030895 | 15.79347695713954 |
| H | 14.58896032596070 | 29.73969266048510 | 15.80581825595058 |
| O | 13.62489043416799 | 27.07187956926482 | 12.23664177143517 |
| H | 12.84772625042733 | 26.60369696757209 | 11.89140741861217 |
| C | 10.58899414491020 | 25.32625110478326 | 10.11539372207280 |
| C | 10.69723461969735 | 23.77943599926870 | 10.00667855981688 |
| C | 11.47754424798450 | 23.56628968179102 | 8.69291214826218  |
| C | 10.52898911910855 | 23.96169350645390 | 7.54472377413767  |
| C | 13.52167078788849 | 24.64928182143627 | 9.84989712231122  |
| H | 11.24395998488742 | 23.38587950946492 | 10.86944597860780 |
| H | 9.71632732165844  | 23.29175175028178 | 9.98360426555748  |
| H | 9.55157519208377  | 23.47811434105747 | 7.64482657917821  |
| H | 13.08074821583374 | 24.48549585378561 | 10.83258276842633 |
| C | 11.38465347192303 | 25.82851516286760 | 8.88905159864182  |
| C | 10.45087247797282 | 25.50845066817593 | 7.69032256851892  |
| C | 12.49728855621168 | 24.73715629454363 | 8.71346591983448  |
| C | 13.29733585091493 | 24.88196021189543 | 7.41287043593468  |
| C | 11.82060673041962 | 27.27781786021556 | 8.95525466328080  |
| H | 10.93438896566851 | 23.66901576988773 | 6.57148771636447  |
| H | 14.21829660803344 | 23.82645363180356 | 9.64971882313529  |
| H | 14.11304819241019 | 25.56951321976087 | 9.91110169654728  |
| H | 12.52675476150101 | 27.45521025131794 | 9.77142439736641  |
| H | 12.30264805918918 | 27.57386267224062 | 8.01691262335745  |
| H | 10.95867333698926 | 27.93768137002885 | 9.11059084876091  |
| H | 12.68159695357871 | 25.01259287830501 | 6.52106140513255  |
| H | 13.97381178749692 | 25.74149083462595 | 7.47916064232099  |
| H | 11.91329948624096 | 22.56615629708613 | 8.59488475985262  |
| H | 13.91871820125684 | 23.99188411721767 | 7.26001423410646  |
| H | 9.54624821349499  | 25.67016143746765 | 10.04288459698796 |
| H | 9.43158668873754  | 25.86634166458322 | 7.87464019538008  |
| H | 10.80458343147183 | 26.02015326243139 | 6.79035171996834  |
| O | 11.13263471759468 | 25.85535350857861 | 11.34283821252131 |
| H | 10.61526803280558 | 25.49495036963629 | 12.07162327401639 |

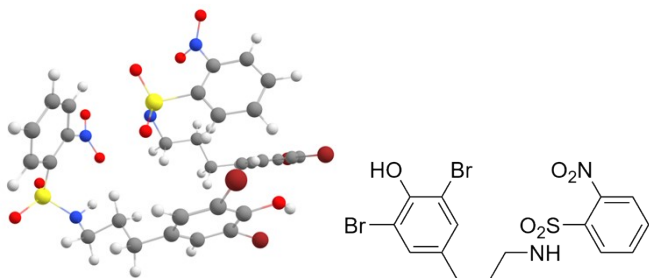

Main article molecule number: **16**

Name: SKS-1-5-2

Qty of copies of the molecule modelled: 2

Qty of imaginary frequencies: 0

Final single point energy (Eh): -13223.5757911229

|    |                   |                   |                   |
|----|-------------------|-------------------|-------------------|
| C  | -0.85193535931600 | 0.89378917220941  | 0.14755668836490  |
| C  | -1.95011365619027 | 0.28843249584645  | 0.76049482605755  |
| C  | -2.58865561143782 | 0.91227675818816  | 1.82053837700147  |
| C  | -2.17183273498423 | 2.15398795612077  | 2.31806267033621  |
| C  | -1.08157478479790 | 2.75254663548603  | 1.67455884459515  |
| C  | -0.42478366573148 | 2.13367005021288  | 0.62078365283097  |
| H  | -2.32840983683399 | -0.66187642130709 | 0.39489886519853  |
| H  | 0.42042525827255  | 2.63353964345575  | 0.15880511942159  |
| Br | -0.52227149649453 | 4.48460107447228  | 2.23544636517167  |
| Br | -4.14344032388674 | 0.10725190979009  | 2.59436977091923  |
| O  | -2.76004278960910 | 2.79028961599816  | 3.35242226614882  |
| H  | -3.47434096569497 | 2.23695576179381  | 3.71036152175848  |
| C  | -0.17567142216637 | 0.22742316639762  | -1.02161800494060 |
| H  | -0.94899029676470 | -0.15398658855270 | -1.70281229057363 |
| H  | 0.39559576545648  | 0.97435368822482  | -1.58543050131503 |
| C  | 0.75558339917735  | -0.92930253809368 | -0.63061005648524 |
| H  | 0.22370616503645  | -1.61305845056852 | 0.04692501694226  |
| H  | 1.62341198211515  | -0.54491414395319 | -0.07913942450915 |
| C  | 1.19567573044717  | -1.69560365612835 | -1.87782555961987 |
| H  | 0.30757489050835  | -2.06601527331537 | -2.41001243954101 |
| H  | 1.72007570072836  | -1.03643916990736 | -2.57980655336517 |
| N  | 2.06054276583004  | -2.84922207657980 | -1.59841739511682 |
| H  | 1.89798535771350  | -3.29492553397718 | -0.69957682021111 |
| S  | 3.70872068536175  | -2.72676368068678 | -1.86608292387087 |
| O  | 3.86081523311111  | -2.12947675609976 | -3.19603206145025 |
| O  | 4.28744277172884  | -4.02283635616696 | -1.51789223079703 |
| C  | 4.41977069976195  | -1.50578842257409 | -0.71306255329534 |
| C  | 4.81705937474224  | -0.28871218770368 | -1.25580273267248 |
| C  | 4.73303865727083  | -1.77103073534250 | 0.62470761462924  |
| C  | 5.48338324571958  | 0.65132827373656  | -0.47289712612955 |
| H  | 4.62576253001009  | -0.10296983710480 | -2.30717549560254 |
| C  | 5.44437069174048  | -0.86294729540931 | 1.39326486822214  |
| C  | 5.80341679635549  | 0.36241785470310  | 0.84635172572960  |
| H  | 5.76866622571367  | 1.60334046419151  | -0.90968457319103 |
| H  | 5.67216136697196  | -1.10289929415856 | 2.42416999597643  |
| H  | 6.32239385919530  | 1.08670069674473  | 1.46523100493627  |
| N  | 4.27428076290030  | -2.98272895417395 | 1.32606564310109  |
| O  | 3.13191880079151  | -3.37295809849153 | 1.09432233339937  |
| O  | 5.02732071938489  | -3.48264114250221 | 2.14133094880801  |
| C  | -1.91069575650641 | -1.79569622340024 | 5.24662737421605  |
| C  | -2.51146311250706 | -2.77795199111612 | 6.02809507420818  |
| C  | -3.39608930927970 | -2.41523880849109 | 7.03454034782552  |
| C  | -3.72580489880765 | -1.08242728826187 | 7.30275540859090  |
| C  | -3.10762413344023 | -0.11344601821799 | 6.50212906001042  |
| C  | -2.21513177718333 | -0.45686011015375 | 5.50394733930567  |
| H  | -2.29769012436618 | -3.82795003287743 | 5.85510801000762  |
| H  | -1.75931675142337 | 0.32798363689054  | 4.90634882325837  |
| Br | -3.55103070504247 | 1.72167120311072  | 6.77411180899666  |
| Br | -4.22144266732017 | -3.77023570413350 | 8.10685471811603  |
| O  | -4.58894596652364 | -0.69631901747691 | 8.26241505904382  |
| H  | -4.92327467950449 | -1.48693286471562 | 8.71520192920816  |
| C  | -0.93232765083641 | -2.12895912205557 | 4.15155110791400  |
| H  | -0.98426996904607 | -3.19656839146858 | 3.90825278996687  |
| H  | -1.22208979068752 | -1.58082062370212 | 3.24285793232336  |
| C  | 0.50013439433376  | -1.73273651668566 | 4.53472956422333  |
| H  | 0.88231930523074  | -2.40986155052778 | 5.30999863099922  |
| H  | 0.47431395105726  | -0.73405878593336 | 4.98109027920243  |
| C  | 1.43430671389547  | -1.72728391144423 | 3.32651299993275  |
| H  | 1.54890743826507  | -2.73855547758468 | 2.91679016529931  |
| H  | 1.02298409037575  | -1.10479660523188 | 2.52224199010134  |
| N  | 2.79436659245204  | -1.23329154844444 | 3.61349398938235  |
| H  | 3.21329942492617  | -1.63822123703900 | 4.44891948037749  |
| S  | 3.0622296205476   | 0.42394484166146  | 3.61478386011045  |
| O  | 2.51324360134662  | 0.92693153072712  | 2.34992580317842  |
| O  | 4.46597068403099  | 0.62364960488159  | 3.98394220665998  |
| C  | 2.06066247441151  | 1.19652022953566  | 4.92534348039070  |
| C  | 0.95374326973953  | 1.93364032597549  | 4.51981029604816  |
| C  | 2.37158270102738  | 1.15073135665719  | 6.28627312045301  |
| C  | 0.14193680947571  | 2.56580363186843  | 5.45721211601244  |
| H  | 0.73979018692425  | 2.00696179877425  | 3.45934286895946  |
| C  | 1.58919536862253  | 1.80817014446185  | 7.22557026376812  |
| C  | 0.45580610061402  | 2.49636849691616  | 6.80951700198863  |
| H  | -0.73073725585383 | 3.11581157067835  | 5.11949795961757  |
| H  | 1.86979338436921  | 1.75896054666577  | 8.27221213449638  |
| H  | -0.17728025933572 | 2.98312189452393  | 7.54429561100953  |
| N  | 3.50191181749293  | 0.36659072450847  | 6.82305190652509  |
| O  | 3.62597675991634  | -0.78754362141583 | 6.42783218614082  |
| O  | 4.19456569496450  | 0.90174854776606  | 7.66904848526773  |



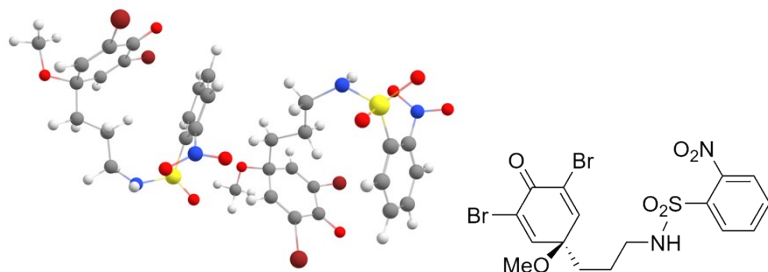

Main article molecule number: 17

Name: SKS-i-2-2

Qty of copies of the molecule modelled: 2

Qty of imaginary frequencies: 0

Final single point energy (Eh): -13452.501833357

|    |                   |                   |                   |
|----|-------------------|-------------------|-------------------|
| C  | -0.99831891434629 | 0.75662932461464  | -0.90905409954719 |
| C  | -1.17445155697410 | 0.40268312848495  | 0.53836505052463  |
| C  | -2.33627776803058 | 0.54632188738800  | 1.17853851053344  |
| C  | -3.59067463665019 | 0.98295962553739  | 0.50578663244178  |
| C  | -3.43646614262081 | 1.25541571274941  | -0.94685345219158 |
| C  | -2.27806107607380 | 1.13112197428844  | -1.59713634589055 |
| H  | -0.28172931111782 | 0.05734638096798  | 1.05523056121315  |
| H  | -2.20097275252674 | 1.30517570219826  | -2.66789383038023 |
| Br | -5.02411998904610 | 1.77239038787763  | -1.86245687965390 |
| Br | -2.48918624605881 | 0.18181779915107  | 3.04091108215969  |
| O  | -4.64761238943339 | 1.09536870431699  | 1.09327066185498  |
| C  | -0.01307133617409 | 1.94744606570974  | -1.01677352484253 |
| H  | 0.98147865134253  | 1.55850175774097  | -0.76346110330264 |
| H  | 0.01366675457345  | 2.24173593851903  | -2.07189507613136 |
| C  | -0.36880581675572 | 3.14659596042534  | -0.14606639116751 |
| H  | -0.16954780250060 | 2.92849767946848  | 0.91134465234597  |
| H  | -1.44100803958477 | 3.35682293955380  | -0.22636343426953 |
| C  | 0.42545393680618  | 4.38385847346334  | -0.57372134254410 |
| H  | 1.48493024275350  | 4.11997766959010  | -0.70177952864999 |
| H  | 0.06797651267793  | 4.75372504060417  | -1.54145569471482 |
| N  | 0.40364463961730  | 5.50071256767492  | 0.37932649046737  |
| H  | 0.75708107300931  | 5.26405491362952  | 1.30357211949156  |
| S  | -0.98663322337963 | 6.42394335622353  | 0.54941254420701  |
| O  | -1.45698487746359 | 6.69915480196818  | -0.81072043716221 |
| O  | -0.66885040314779 | 7.48191887765415  | 1.50700761636929  |
| C  | -2.29592155846403 | 5.41323038303032  | 1.32383146309914  |
| C  | -3.37867562410657 | 5.06022071309973  | 0.52220091203087  |
| C  | -2.32964490298412 | 5.06487699649785  | 2.67588439474721  |
| C  | -4.44087114698427 | 4.33317736920742  | 1.04887704548823  |
| H  | -3.37558007146353 | 5.36638776308577  | -0.51888943544278 |
| C  | -3.39981000869957 | 4.36299407156653  | 3.21604808406031  |
| C  | -4.44747015886405 | 3.97556501304835  | 2.39232542179282  |
| H  | -5.26002579774709 | 4.03560314272180  | 0.40264811229049  |
| H  | -3.38796294555251 | 4.11231534192514  | 4.27108235886503  |
| H  | -5.26324319702566 | 3.38661685546809  | 2.79713899027606  |
| N  | -1.23060272942238 | 5.37306114450112  | 3.61276711861767  |
| O  | -0.08476884563208 | 5.12128353026200  | 3.25199097263633  |
| O  | -1.54219349867098 | 5.79885524673838  | 4.70978357812517  |
| O  | -0.34239767863638 | -0.30687451475766 | -1.60817841003065 |
| C  | -1.12188789809857 | -1.50474588327681 | -1.72878095264451 |
| H  | -2.01093249202381 | -1.34119572565181 | -2.35073419948018 |
| H  | -0.47534478408355 | -2.23138252164851 | -2.22206229893806 |
| H  | -1.42591491985449 | -1.88347479262309 | -0.74334651781399 |
| C  | 4.91322370652267  | 0.27586415891201  | -8.09381473796130 |
| C  | 4.82510641507354  | 1.76885081636794  | -7.97018325598933 |
| C  | 5.10516459250134  | 2.42004666720222  | -6.83917284965553 |
| C  | 5.60994173958686  | 1.74276674315598  | -5.61366194930642 |
| C  | 5.751337443350526 | 0.26702325478213  | -5.74651168379808 |
| C  | 5.46318333939948  | -0.39420151186077 | -6.86876567867309 |
| H  | 4.48349859053143  | 2.29861884545215  | -8.85696008863692 |
| H  | 5.60377169201899  | -1.47025124686104 | -6.94312925858635 |
| Br | 6.40964647131374  | -0.64033780617986 | -4.20917385380023 |
| Br | 4.89538240743013  | 4.30482796760919  | -6.70657001351023 |
| O  | 5.89122925559329  | 2.34186196004543  | -4.59631586358455 |
| C  | 3.49853239758409  | -0.28983685362194 | -8.37948164976947 |
| H  | 3.23641115632588  | 0.01650283557102  | -9.39962462019280 |
| H  | 3.58389454011000  | -1.38429043751512 | -8.38619455796837 |

|   |                   |                   |                    |
|---|-------------------|-------------------|--------------------|
| C | 2.43896251255257  | 0.16938597875638  | -7.38156041928825  |
| H | 2.17409655031479  | 1.21891312465478  | -7.56462971266810  |
| H | 2.84540297630573  | 0.12422370405652  | -6.36454107014639  |
| C | 1.17810144105971  | -0.69470705113768 | -7.46149549775049  |
| H | 0.85935703370029  | -0.80339934110114 | -8.50689279731703  |
| H | 1.37380189741442  | -1.70265399626738 | -7.08001734567820  |
| N | 0.01355066818230  | -0.15871890273589 | -6.74472218063865  |
| H | -0.31154687906776 | 0.74492493497387  | -7.08130968080880  |
| S | -0.02916906367251 | -0.17998469426589 | -5.07235961925996  |
| O | 0.47131616943405  | -1.49558071507763 | -4.66707150644931  |
| O | -1.35681076461475 | 0.31700823428938  | -4.70010548715612  |
| C | 1.16326866830052  | 1.03159889286249  | -4.42186773080853  |
| C | 2.27674918862140  | 0.54492181805818  | -3.74240340522002  |
| C | 0.97430438292925  | 2.41131936994743  | -4.48691143030869  |
| C | 3.20572238776710  | 1.42356701865079  | -3.19740021522296  |
| H | 2.39534533515890  | -0.52863815498601 | -3.63956888146164  |
| C | 1.88717273283257  | 3.29827425881316  | -3.93154462819784  |
| C | 3.02221677750124  | 2.79855901581401  | -3.30784445848862  |
| H | 4.08471821902155  | 1.03280484511920  | -2.69547926175715  |
| H | 1.70237133834814  | 4.36554447345682  | -3.99913985807288  |
| H | 3.76463577077426  | 3.48249389605722  | -2.91042446515600  |
| N | -0.21573792089237 | 3.01689127853922  | -5.11670310841214  |
| O | -0.44520371858056 | 2.74466372992258  | -6.28941054289351  |
| O | -0.86061841845389 | 3.78722309567770  | -4.42790154834885  |
| O | 5.68172806047845  | -0.09236701784907 | -9.24418238264798  |
| C | 7.05207837090086  | 0.32078594060636  | -9.20450338165005  |
| H | 7.59039785207681  | -0.13553306364739 | -8.36310650980642  |
| H | 7.49370264131762  | -0.02163945137850 | -10.14189566282920 |
| H | 7.14385077221057  | 1.41329258213567  | -9.13896856896220  |

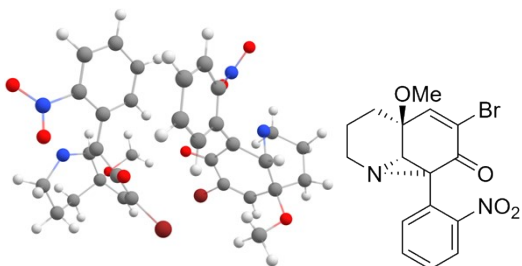

Main article molecule number: **18**

Name: SKS-2-1-1b

Qty of copies of the molecule modelled: 2

Qty of imaginary frequencies: 0

Final single point energy (Eh): -7205.86349706478

|    |                   |                   |                   |
|----|-------------------|-------------------|-------------------|
| C  | 2.72071818388470  | 0.22691083897602  | 0.17560485636420  |
| C  | 1.84586214245310  | 1.32439820404413  | 0.81943187319624  |
| C  | 0.39420844606795  | 1.07590788359933  | 0.42422261649091  |
| C  | 0.80503187036447  | -1.43362753822783 | 0.23439366506722  |
| C  | 2.26664564555350  | -1.15983522001787 | 0.62312186982083  |
| H  | 2.89575297401142  | -1.92246636020930 | 0.15079235134698  |
| H  | 3.76849477046882  | 0.40807644945869  | 0.43920229664450  |
| H  | 0.78069930332005  | -1.82015663625455 | -0.79266052807498 |
| H  | 0.35734488782930  | -2.20059932662683 | 0.87406171554512  |
| H  | 2.41028860742825  | -1.26724637859871 | 1.70340584081285  |
| H  | 2.62638245921221  | 0.34288946604927  | -0.91240592572093 |
| H  | 0.00536487745744  | 1.80729343868783  | -0.28661537930365 |
| C  | -0.56554131475196 | 0.45227722601753  | 1.39547187130762  |
| C  | 2.09182276237660  | 1.27082973769317  | 2.30211064273930  |
| H  | 3.05993568894320  | 1.64473651319906  | 2.62973551073513  |
| C  | 1.26118736086945  | 0.67519468834346  | 3.15797838359238  |
| C  | -0.06830099669428 | 0.13419974264559  | 2.79085742980855  |
| O  | -0.76245059970383 | -0.47640510931739 | 3.57900059656229  |
| N  | -0.09731222607907 | -0.27159251018968 | 0.21493034293769  |
| Br | 1.76001215414067  | 0.45063398913881  | 4.99170774646023  |
| O  | 2.30559281473710  | 2.56179306503475  | 0.29054797557681  |

|    |                   |                   |                   |
|----|-------------------|-------------------|-------------------|
| C  | 1.63683676135448  | 3.71284527993103  | 0.82082768336870  |
| H  | 1.64030117140278  | 3.72045153723041  | 1.91802131557710  |
| H  | 2.18519345209109  | 4.57991119037872  | 0.44671339797436  |
| H  | 0.59585991226200  | 3.77746348876871  | 0.47409211664527  |
| C  | -1.99512543230603 | 0.89973938334862  | 1.34554199784264  |
| C  | -3.04232323677935 | 0.13846853515134  | 0.82712238664864  |
| C  | -2.28019820623651 | 2.21470311498423  | 1.71938272305834  |
| C  | -4.31820093586007 | 0.66022269310085  | 0.64493273461397  |
| C  | -3.55523342577592 | 2.74434678064486  | 1.56841513991944  |
| H  | -1.48262150292852 | 2.82916409005895  | 2.12887729547476  |
| C  | -4.57627563874830 | 1.96913767243602  | 1.02530782123558  |
| H  | -5.08850948492635 | 0.03163138369293  | 0.21192950102061  |
| H  | -3.74316507409789 | 3.77241972219552  | 1.86428330749731  |
| H  | -5.57177862270517 | 2.38223200731475  | 0.89397479561694  |
| N  | -2.84542863020175 | -1.27337733581127 | 0.45376318270747  |
| O  | -3.43045418591478 | -1.67380288746111 | -0.54502435662651 |
| O  | -2.14964151251849 | -1.96098795916550 | 1.18762772505936  |
| C  | 0.11098826820177  | 5.32949967462677  | 8.99207433463277  |
| C  | 0.27932912993338  | 4.04923851632933  | 8.13209015109306  |
| C  | -1.06013006985235 | 3.73009578519800  | 7.49861419737971  |
| C  | -1.07931541015562 | 6.13371579511497  | 6.86454909181308  |
| C  | -0.76400373977348 | 6.42283486049194  | 8.33267226231365  |
| H  | -1.71464814951248 | 6.50159398587635  | 8.87115982172046  |
| H  | 1.10827800575990  | 5.70715176447080  | 9.24020091144649  |
| H  | -1.79808828134997 | 6.86095613477145  | 6.47354992331957  |
| H  | -0.17338375033693 | 6.21062933126853  | 6.25180804462707  |
| H  | -0.27689342569516 | 7.40015568009967  | 8.40568505055742  |
| H  | -0.33911224089222 | 4.99368595762917  | 9.93203869297807  |
| H  | -1.70676559829888 | 3.09264050677977  | 8.10716147279481  |
| C  | -1.24689649524085 | 3.68548684160488  | 5.99631171414182  |
| C  | 1.38555529105090  | 4.26377002889668  | 7.13867142673639  |
| H  | 2.34961233804765  | 4.52264158463926  | 7.57241238947634  |
| C  | 1.24786810581547  | 4.14817467280421  | 5.81566196961271  |
| C  | -0.01647600128428 | 3.77655614676826  | 5.13817109516061  |
| O  | -0.05787009248045 | 3.52339063822457  | 3.94671854454568  |
| N  | -1.72353523303933 | 4.81230683117785  | 6.81225847015737  |
| Br | 2.74223830474327  | 4.45491027074305  | 4.66722746176943  |
| O  | 0.67357666296371  | 3.03675963199450  | 9.06150301112830  |
| C  | 0.92117805155627  | 1.75569821143633  | 8.47943167341315  |
| H  | 1.78066501379334  | 1.77726656452857  | 7.79644004053936  |
| H  | 1.13790060881578  | 1.08361717813788  | 9.31206033393637  |
| H  | 0.04464803477879  | 1.37886291781626  | 7.93359018425403  |
| C  | -2.34777909961393 | 2.83556658427920  | 5.44412266404536  |
| C  | -3.57532154703242 | 3.35833292474638  | 5.03429027557939  |
| C  | -2.20782442364028 | 1.45077912158799  | 5.43292445940197  |
| C  | -4.64827233128002 | 2.55039020930321  | 4.68547007231316  |
| C  | -3.25037136460413 | 0.62409416374106  | 5.02580098148965  |
| H  | -1.26052721483484 | 1.01134564796155  | 5.73362959346042  |
| C  | -4.47795937574150 | 1.17221586675012  | 4.67215292852737  |
| H  | -5.58610158441709 | 3.01096880311156  | 4.39436041766537  |
| H  | -3.09325674710427 | -0.44817462613514 | 4.98641409682265  |
| H  | -5.29816947611627 | 0.53116792839719  | 4.36480994306588  |
| N  | -3.75809118375857 | 4.80839473853307  | 4.87296394206846  |
| O  | -4.82307625389309 | 5.29175422341376  | 5.23071785293401  |
| O  | -2.84815394551173 | 5.42699404263517  | 4.32937598353314  |

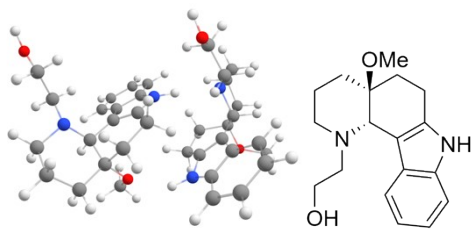

Main article molecule number: **19**

Name: SKS-4-3b-3

Qty of copies of the molecule modelled: 2

Qty of imaginary frequencies: 0

Final single point energy (Eh): -1920.21246543518

|   |                    |                   |                   |
|---|--------------------|-------------------|-------------------|
| C | -22.11418468397797 | -8.95506958918705 | -3.55869499148777 |
| C | -20.77833605991088 | -8.67533408598246 | -4.25036655605066 |

|   |                    |                    |                    |
|---|--------------------|--------------------|--------------------|
| C | -20.86961208667495 | -7.36494883495269  | -5.08348996923334  |
| C | -22.60775404045678 | -6.49827984276868  | -3.60806682053364  |
| C | -22.59542052695710 | -7.75437489596320  | -2.75083092954668  |
| H | -21.94790967438528 | -7.59806308393069  | -1.88036160734446  |
| H | -22.86451838260614 | -9.18834299877060  | -4.32637009724833  |
| H | -23.37616107130831 | -6.59816242064323  | -4.40512656225415  |
| H | -22.89626088514920 | -5.64027671633360  | -2.99054362518524  |
| H | -23.60618880267143 | -7.93496029790376  | -2.36557543682290  |
| H | -22.00887671746670 | -9.84569919517547  | -2.92793776434146  |
| H | -21.64913011261863 | -7.49789020247935  | -5.86184262976198  |
| C | -19.63418065541424 | -8.57190128316609  | -3.23752134393380  |
| H | -19.61460713522309 | -9.49640975033470  | -2.64935867309614  |
| H | -19.85028589103887 | -7.75815607384629  | -2.54391458997424  |
| C | -19.54283533697224 | -7.13020948140104  | -5.72546477591616  |
| C | -18.25818856993362 | -8.35136178112627  | -3.88899678229504  |
| H | -17.58806832069357 | -7.85041327652579  | -3.17546937767182  |
| H | -17.80039667316241 | -9.31914356730765  | -4.13252924810687  |
| C | -18.37908088489037 | -7.56700231402785  | -5.14531279122179  |
| O | -20.41610266238690 | -9.80130508128364  | -5.06812742985120  |
| C | -21.06733180955444 | -9.95416190940310  | -6.32027045246056  |
| H | -20.73011440696326 | -9.20517327316485  | -7.05128685783745  |
| H | -20.78756969746578 | -10.94617231041938 | -6.68496476328942  |
| H | -22.16379477942542 | -9.91386112744724  | -6.24019175869397  |
| N | -21.28818912701956 | -6.22477125741621  | -4.20388277358203  |
| C | -19.19249863130060 | -6.53766372091795  | -6.98639240609385  |
| H | -16.37291207075747 | -7.15947037395569  | -5.60508991283247  |
| N | -17.31034244113823 | -7.28891529142642  | -5.97196693926662  |
| C | -17.77749981462300 | -6.61964876589606  | -7.08831206533702  |
| C | -19.91102554763434 | -5.94210856101615  | -8.03038541163833  |
| H | -20.99504072409677 | -5.87531315445372  | -7.99022667330609  |
| C | -17.07764514520909 | -6.09122017297761  | -8.16791247388451  |
| H | -15.99443094573251 | -6.15744774415622  | -8.22429703959764  |
| C | -17.81584104567454 | -5.49116582853269  | -9.18081745557221  |
| H | -17.30077099179808 | -5.07234412003878  | -10.04008086415792 |
| C | -19.21649207605245 | -5.42678506151654  | -9.11585752496919  |
| H | -19.76427976929091 | -4.95996050533959  | -9.92910214081885  |
| C | -21.34140520666907 | -4.97973973354015  | -4.98689452955751  |
| H | -20.36038922565165 | -4.81324490207643  | -5.44324092667724  |
| H | -22.07398114517961 | -5.05402300698180  | -5.81469217719730  |
| C | -21.65917683382055 | -3.75236505099400  | -4.13903385905961  |
| H | -22.74225607429096 | -3.65107592258551  | -3.97100551639607  |
| H | -21.16553119860879 | -3.83810111566410  | -3.15636855575149  |
| O | -21.16305252142318 | -2.62594623015122  | -4.86724947344008  |
| H | -21.43559934409316 | -1.82594818952076  | -4.40643001350467  |
| C | -16.56857089145154 | -4.89817650596681  | -2.11596564750669  |
| C | -17.56837098976315 | -4.78755062651118  | -3.04755046743450  |
| C | -17.41246442768307 | -4.30093936674790  | -4.43990435561020  |
| H | -17.96094706293725 | -3.35829952181614  | -4.57312842629923  |
| H | -17.88107186670491 | -5.01077346302538  | -5.12847040763900  |
| C | -15.92561565487928 | -4.08734720608932  | -4.80534469984352  |
| H | -15.76664397130265 | -4.37062834431218  | -5.85309634672830  |
| H | -15.68077827265186 | -3.02712838669352  | -4.71283332976700  |
| C | -14.91792188718067 | -4.85834368548494  | -3.94597219584493  |
| C | -13.47855268960000 | -4.51748031035501  | -4.34377008498868  |
| H | -13.36405254839416 | -4.65964093554592  | -5.42559054656125  |
| C | -13.06935168993834 | -3.10810970203511  | -3.92014460384740  |
| H | -13.58341079247193 | -2.35512402240579  | -4.52887595321408  |
| H | -11.99296321689143 | -2.96922672189378  | -4.07942779058306  |
| C | -13.40356074073571 | -2.88215731600418  | -2.45343351897724  |
| H | -13.15804666570684 | -1.85374946700802  | -2.16580755884554  |
| N | -14.82830322538010 | -3.11951218781078  | -2.20201644104021  |
| C | -15.20986202247881 | -2.64370285254651  | -0.86934186705386  |
| C | -15.56735756885707 | -1.16521669649214  | -0.91920147038169  |
| H | -16.48101107221214 | -1.04476373877491  | -1.52140398701356  |
| H | -14.76416126955374 | -0.58742102007696  | -1.40457287538862  |
| O | -15.76302498751379 | -0.73099432840978  | 0.42922318757547   |
| H | -16.07097077193166 | 0.18021872301247   | 0.41123501040336   |
| H | -16.08942228031245 | -3.19097924616408  | -0.52070168076708  |
| H | -14.40852537194972 | -2.80247886211820  | -0.12217915959993  |
| H | -12.77724769428589 | -3.55099828258368  | -1.82209759830642  |
| H | -12.80755390909222 | -5.23493259523484  | -3.85223608601584  |
| O | -15.15665951559712 | -6.25888472598450  | -4.24165460406804  |
| C | -14.63505013752436 | -7.22936547829754  | -3.33983164610283  |
| H | -14.75946852771361 | -8.19994180405036  | -3.83052169691171  |
| H | -13.56550529094694 | -7.08496590597455  | -3.13478904310066  |
| H | -15.18824496738185 | -7.24210148695938  | -2.39074709290183  |
| N | -18.75899702042045 | -5.23070138862708  | -2.51125388612343  |
| H | -19.58182931736405 | -5.49198615661776  | -3.05777934504621  |
| C | -18.52473471691116 | -5.67692176408540  | -1.22433136944919  |
| C | -19.40146050035491 | -6.21827701817919  | -0.28967666141428  |
| H | -20.45879638466477 | -6.33667938739520  | -0.51084733487882  |
| C | -18.88230130018658 | -6.58722677004995  | 0.94580393960574   |

|   |                    |                   |                   |
|---|--------------------|-------------------|-------------------|
| H | -19.54198070366229 | -7.01375794408661 | 1.69546163694806  |
| C | -17.52259901616246 | -6.40638092908443 | 1.24402191805662  |
| C | -16.65197940981174 | -5.84942855376115 | 0.31749096894594  |
| H | -15.60471626885951 | -5.69760497607368 | 0.56780870494824  |
| H | -17.15051759757181 | -6.69805158724689 | 2.22171164856228  |
| C | -15.15605259774306 | -4.54656103340850 | -2.43969341812938 |
| H | -14.47138761401243 | -5.18043409116330 | -1.83665817905907 |
| C | -17.14538582386250 | -5.47972022715267 | -0.93978107179929 |

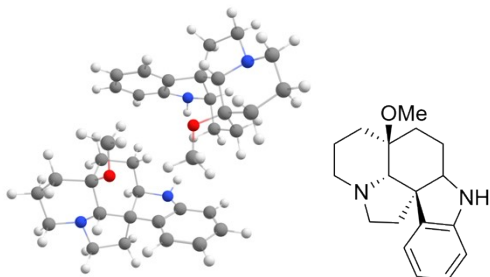

Main article molecule number: **20**

Name: SKS-5-1-2b

Qty of copies of the molecule modelled: 2

Qty of imaginary frequencies: 0

Final single point energy (Eh): -1769.78290724427

|   |                   |                  |                   |
|---|-------------------|------------------|-------------------|
| C | 14.30152252368839 | 5.01364895789819 | -0.03086045474253 |
| C | 13.00829814012873 | 5.38059801308495 | 0.71547421339173  |
| C | 12.36496350024472 | 4.09299382615927 | 1.24810039585762  |
| C | 14.48987881418910 | 2.89931254220254 | 1.30625043168652  |
| C | 15.23636885370614 | 4.12128785286855 | 0.78677641546796  |
| H | 15.65134547154734 | 4.67712668426341 | 1.63607251211245  |
| H | 14.82545449295341 | 5.92753729344620 | -0.33571064431339 |
| H | 14.20069870214374 | 2.24516964134095 | 0.45334195573514  |
| H | 15.13446473322009 | 2.30408700412866 | 1.96647369669993  |
| H | 16.08239142387596 | 3.80419108089308 | 0.16532002044200  |
| H | 14.00857099149216 | 4.48436155405367 | -0.94943025570619 |
| H | 12.02816798467543 | 3.50749575707216 | 0.36271672633232  |
| C | 13.25893976840136 | 6.35811401300754 | 1.87131659124065  |
| H | 13.71187424802155 | 7.28026193967424 | 1.48861184057294  |
| H | 13.97798697780133 | 5.90620637606449 | 2.56429335497193  |
| C | 11.18087034111075 | 4.24722282797955 | 2.21542904089236  |
| C | 11.95530991486508 | 6.66529304949381 | 2.60258211600426  |
| H | 12.12644982666744 | 7.41639661975718 | 3.38711889702391  |
| H | 11.23229365703199 | 7.08120702812815 | 1.88857582661065  |
| C | 11.36316939785837 | 5.40339124625880 | 3.23732322562504  |
| O | 12.03061450159571 | 5.91333395865819 | -0.19288636074071 |
| C | 12.47484808131322 | 7.00161937883365 | -1.00388454390082 |
| H | 13.07941369229062 | 6.65218654243204 | -1.85356563518684 |
| H | 11.58478101471109 | 7.50430280685423 | -1.38468042560913 |
| H | 13.05079272542049 | 7.74043000851663 | -0.43718929322074 |
| N | 13.32098910878376 | 3.32932989456805 | 2.05559903958642  |
| C | 9.80430708438798  | 4.54999756550170 | 1.67654383546426  |
| H | 9.80673234577148  | 6.49531335530968 | 4.17631198442470  |
| N | 9.97514469058320  | 5.61479038697791 | 3.70734594661503  |
| C | 9.12759323717914  | 5.31626759992039 | 2.63566092206264  |
| C | 9.14309958299678  | 4.10067333259145 | 0.54942360236438  |
| H | 9.66660982827045  | 3.51094971724906 | -0.19884512579471 |
| C | 7.78014529015207  | 5.63045302266510 | 2.48377134446303  |
| H | 7.24972564803663  | 6.21290135955889 | 3.23279911970171  |
| C | 7.12366595708707  | 5.17401995520364 | 1.339904221098125 |
| H | 6.07324225775864  | 5.41526017658691 | 1.20058023869284  |
| C | 7.79234927217230  | 4.42337387746878 | 0.37525419877952  |
| H | 7.26389898847183  | 4.08423992952827 | -0.51079386997957 |
| C | 12.54401682048467 | 2.23373410996083 | 2.63380731850237  |
| H | 12.42362615693609 | 1.40602716400462 | 1.90558873564648  |
| H | 13.05261210370935 | 1.82572448488371 | 3.51604471719050  |
| C | 11.17667918001220 | 2.86382053791484 | 2.95057448993848  |
| H | 10.36072207159010 | 2.24085393657911 | 2.57446402830891  |
| H | 11.01305378030892 | 3.00481122896258 | 4.02264803043408  |
| H | 12.00061803080988 | 5.07608896591606 | 4.06888041675467  |

|   |                   |                   |                   |
|---|-------------------|-------------------|-------------------|
| C | 7.14599109132755  | 8.58320879858537  | -3.06329395466015 |
| C | 8.22274432823280  | 8.74686840667159  | -1.97456603831861 |
| C | 8.63035973626073  | 10.22610319859336 | -1.88797727242930 |
| C | 6.51615654623491  | 10.99606316329102 | -2.83381987212165 |
| C | 5.98760986024239  | 9.57234725096079  | -2.93169742777680 |
| H | 5.32173256191694  | 9.47800451416062  | -3.79795038001870 |
| H | 6.75736675709734  | 7.55815979324484  | -3.05102589045998 |
| H | 7.00209342040414  | 11.28432054735769 | -3.79273822682320 |
| H | 5.69496375846481  | 11.70400831296654 | -2.66015079693924 |
| H | 5.38999281697050  | 9.34959184872263  | -2.03940806536703 |
| H | 7.64377552488328  | 8.73474747015591  | -4.03180434840336 |
| H | 9.17250419079431  | 10.46585522992356 | -2.83109239186386 |
| C | 7.75258594263711  | 8.24326770934323  | -0.60910804963680 |
| H | 7.47915405181440  | 7.18401613527352  | -0.67153089423636 |
| H | 6.84559172511838  | 8.79402255456111  | -0.33186404064411 |
| C | 9.50297919958226  | 10.65393217685064 | -0.69188740339383 |
| C | 8.83146391992047  | 8.45872505196955  | 0.44582101912564  |
| H | 8.52160464848663  | 8.01490298220522  | 1.39996868834802  |
| H | 9.75636086411441  | 7.95194304896366  | 0.13888910024211  |
| C | 9.11659647429876  | 9.94747544449549  | 0.63631415553610  |
| O | 9.43116541702489  | 8.08222896908138  | -2.39415158910614 |
| C | 9.36636766743008  | 6.66113117834001  | -2.47404438042023 |
| H | 8.51874018499928  | 6.31440794251564  | -3.08062050655852 |
| H | 10.28962619697417 | 6.34120728932241  | -2.96388770455441 |
| H | 9.31940359034612  | 6.18683740116879  | -1.48346220133337 |
| N | 7.45102056392088  | 11.08343491594114 | -1.72486923433298 |
| C | 10.99606300438251 | 10.42622236497867 | -0.71587138243154 |
| H | 10.40946707100047 | 9.55999306252193  | 2.26599085502416  |
| N | 10.31850587957297 | 10.17906979666245 | 1.47014453542815  |
| C | 11.41615201966504 | 10.21055535500563 | 0.60536682514458  |
| C | 11.92680163810368 | 10.54732905148279 | -1.73040706063516 |
| H | 11.60691109751626 | 10.70790078734532 | -2.75688688110945 |
| C | 12.76828598176140 | 10.13046309936530 | 0.92669587767278  |
| H | 13.09317039946908 | 9.97989955504852  | 1.95312864464620  |
| C | 13.69829346746120 | 10.25864253704037 | -0.10631526146358 |
| H | 14.75876329169476 | 10.19658273680555 | 0.12374770394111  |
| C | 13.28952419844420 | 10.45352337225131 | -1.42422186230585 |
| H | 14.02946089869604 | 10.53885291449963 | -2.21400584779232 |
| C | 7.98802377547829  | 12.42375476912784 | -1.50197232136483 |
| H | 8.30171737767838  | 12.88916571077714 | -2.45893294047113 |
| H | 7.22762928821501  | 13.07348408816203 | -1.05136411440520 |
| C | 9.20961379634171  | 12.19207835432366 | -0.59999227173328 |
| H | 10.07270091168902 | 12.76458821521939 | -0.94973483692969 |
| H | 9.02499880188304  | 12.47838843357098 | 0.43923849411699  |
| H | 8.24229484698687  | 10.43576785672028 | 1.08673671943063  |

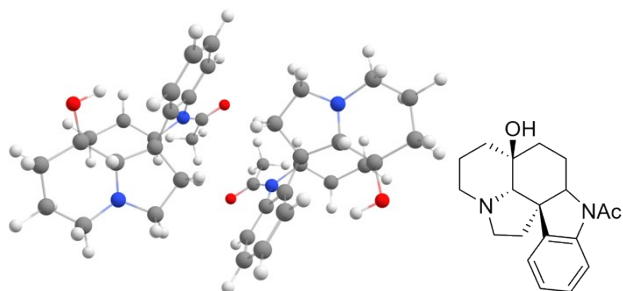

Main article molecule number: **21**

Name: SKS-6-2bs-1

Qty of copies of the molecule modelled: 2

Qty of imaginary frequencies: 0

Final single point energy (Eh): -1996.51147290755

|   |                    |                   |                  |
|---|--------------------|-------------------|------------------|
| C | -15.25463573562393 | 14.49806279602931 | 3.82426150526327 |
| C | -15.08341861118351 | 13.60227767807450 | 2.59457547137627 |
| C | -15.59615659526143 | 12.19915427372811 | 2.93786398595844 |
| C | -17.11824102729275 | 13.01916934981835 | 4.64271953996757 |
| C | -16.67317628082852 | 14.45816437131415 | 4.39587985609947 |

S54

|   |                    |                   |                   |
|---|--------------------|-------------------|-------------------|
| H | -16.70643160159658 | 15.01945555386329 | 5.33703109592127  |
| H | -14.96002680354561 | 15.52231037386198 | 3.56457777519357  |
| H | -16.51231891195144 | 12.57641898313809 | 5.46417628239541  |
| H | -18.16825948213992 | 12.98977284319437 | 4.96125792558754  |
| H | -17.38103445509231 | 14.94111404777342 | 3.71156137886167  |
| H | -14.54382484798694 | 14.14164327093533 | 4.58189883167855  |
| H | -14.91175861973369 | 11.78095410506606 | 3.71211314184084  |
| C | -15.81942325652576 | 14.15438886430660 | 1.36952824571916  |
| H | -15.39066329267939 | 15.13298755231405 | 1.12356268082642  |
| H | -16.87700558566617 | 14.29989681297379 | 1.61699595688476  |
| C | -15.70268954851107 | 11.19951304341702 | 1.78008845186355  |
| C | -15.69990432277138 | 13.21104083819817 | 0.17676280154931  |
| H | -16.20642903024152 | 13.63352373052539 | -0.69922939636358 |
| H | -14.64519844576497 | 13.09763667343198 | -0.10976020762160 |
| C | -16.27969559110652 | 11.82521782104602 | 0.48127477979048  |
| O | -13.66813113019455 | 13.55930023088163 | 2.35416350828729  |
| N | -16.97676013398068 | 12.24567431040861 | 3.41835433439681  |
| C | -14.44602111247630 | 10.55141870945724 | 1.25318212567546  |
| N | -15.83002221891694 | 10.85658726007919 | -0.54881627779085 |
| C | -14.60406991723219 | 10.30628023558798 | -0.11705885643281 |
| C | -13.30405799303021 | 10.12128347331612 | 1.91026094117597  |
| H | -13.17662089566653 | 10.29972858659010 | 2.97469381172091  |
| C | -13.63109048305158 | 9.64315811032727  | -0.85576193341897 |
| H | -13.76917186910539 | 9.45354758086712  | -1.91222856792716 |
| C | -12.48385950827494 | 9.22298854166000  | -0.18161235272934 |
| H | -11.70710392958118 | 8.70561469503881  | -0.73767910379320 |
| C | -12.31553279010101 | 9.45397711116598  | 1.18145238482230  |
| H | -11.41074125682435 | 9.11980530608848  | 1.67996777235748  |
| C | -17.39694419975190 | 10.84518454532879 | 3.52766730434263  |
| H | -17.06733133956997 | 10.40267676768621 | 4.48835951925672  |
| H | -18.48945446183394 | 10.76350451021407 | 3.48209148468054  |
| C | -16.69058689108369 | 10.13870626292172 | 2.35397204755356  |
| H | -16.14778576360532 | 9.25485972830032  | 2.70133429654989  |
| H | -17.39155382816112 | 9.80697381415758  | 1.58260739943783  |
| H | -17.37107491928097 | 11.85994826196847 | 0.52901283697199  |
| H | -13.47657698011701 | 12.84458785891957 | 1.73272404145714  |
| C | -16.53935531717891 | 10.45345216857552 | -1.65218805024559 |
| C | -17.84694320664672 | 11.16570533831619 | -1.91038790319337 |
| H | -18.62150787750259 | 10.77651305019556 | -1.23699442623784 |
| H | -17.77553780572079 | 12.24717665650015 | -1.76649850912011 |
| H | -18.14324457263127 | 10.95296806947592 | -2.93826853566328 |
| O | -16.14134327147519 | 9.54436628694583  | -2.37829911901282 |
| C | -16.41390426539246 | 3.30724280366423  | 0.69754247298348  |
| C | -17.46274194559311 | 3.39560585629293  | -0.41615941168970 |
| C | -18.35960437100284 | 4.61810913680028  | -0.24142478510740 |
| H | -19.11890132634679 | 4.65310105930141  | -1.03190790872377 |
| H | -18.91108685459936 | 4.54726568929813  | 0.703602971811747 |
| C | -17.55753763120465 | 5.92446405424215  | -0.24951714436001 |
| N | -18.39699560254910 | 7.03275858135429  | 0.27049794073076  |
| C | -19.06316697346589 | 7.97003815892777  | -0.47792893544507 |
| O | -19.60105895663207 | 8.94637868473146  | 0.04120362899855  |
| C | -19.08033458980642 | 7.75289006183070  | -1.97361516420792 |
| H | -19.87442437954136 | 8.37409142772600  | -2.38983789487917 |
| H | -19.25055514907292 | 6.70833789045808  | -2.24827194464931 |
| H | -18.12451288990805 | 8.07426381203785  | -2.40746021834375 |
| C | -18.23252064644770 | 7.07532349700656  | 1.67186627746845  |
| C | -19.03924915562144 | 7.67477309562191  | 2.63181332678093  |
| H | -19.91925077990275 | 8.23633623543270  | 2.34637040883134  |
| C | -18.66338213216343 | 7.53573746382941  | 3.96856317109779  |
| H | -19.27989963266778 | 7.99163274368199  | 4.73817602953404  |
| C | -17.52087948602883 | 6.82766030694291  | 4.33304310671511  |
| H | -17.25414886940696 | 6.73230040822627  | 5.38116543096728  |
| C | -16.71830684579507 | 6.23335328068562  | 3.35510096817664  |
| H | -15.82257969607615 | 5.68574116407953  | 3.63636149087450  |
| C | -17.08365035325775 | 6.35487860351147  | 2.02366268032616  |
| H | -17.19386328594764 | 6.15459737473364  | -1.25421326577267 |
| C | -16.38074291860099 | 5.91593280626136  | 0.76240227295433  |
| C | -15.29149471301284 | 6.94232573077470  | 0.33601677724597  |
| H | -15.71659745615906 | 7.70884318282709  | -0.31863177488325 |
| H | -14.88518793041848 | 7.45381091409278  | 1.21378048421024  |
| C | -14.20128891863938 | 6.10343820855243  | -0.36044444634601 |
| N | -14.76700371570701 | 4.75176774686946  | -0.43605582214263 |
| C | -13.78576998462100 | 3.68670417185712  | -0.57594156965426 |
| C | -14.49902201933548 | 2.34098970142624  | -0.68189356295628 |
| H | -15.04412794233019 | 2.29733098876309  | -1.63244616335065 |
| H | -13.75821517402889 | 1.53313093546041  | -0.70206678130607 |
| H | -13.18402796220127 | 3.87462812682703  | -1.47453423716811 |
| H | -13.08809964092121 | 3.67480108926857  | 0.29071597951815  |
| H | -13.95156908998736 | 6.47415634742062  | -1.36193772899319 |
| H | -13.27248255638650 | 6.11795968970761  | 0.24232886769661  |
| H | -18.06429215928740 | 2.47919715866950  | -0.39642307250412 |
| H | -16.95710168660153 | 3.44933618695987  | -1.38685977669871 |

|   |                    |                  |                  |
|---|--------------------|------------------|------------------|
| O | -17.04577782288064 | 3.06897675648821 | 1.96498103063800 |
| H | -17.47928891615283 | 3.88231590563541 | 2.25563322545834 |
| C | -15.59467558301986 | 4.60032523966766 | 0.75972447275823 |
| H | -14.97127035829699 | 4.55081965698717 | 1.68281866809389 |
| C | -15.45215333978435 | 2.13324772313819 | 0.49699195933119 |
| H | -16.03223981507102 | 1.20962294276928 | 0.37958340400422 |
| H | -14.87225875962361 | 2.03268694517289 | 1.42431753975661 |

## 4. Raman spectra

Molecule 1 : 4,4'-di-t-butyl-2,2'-bipyridine

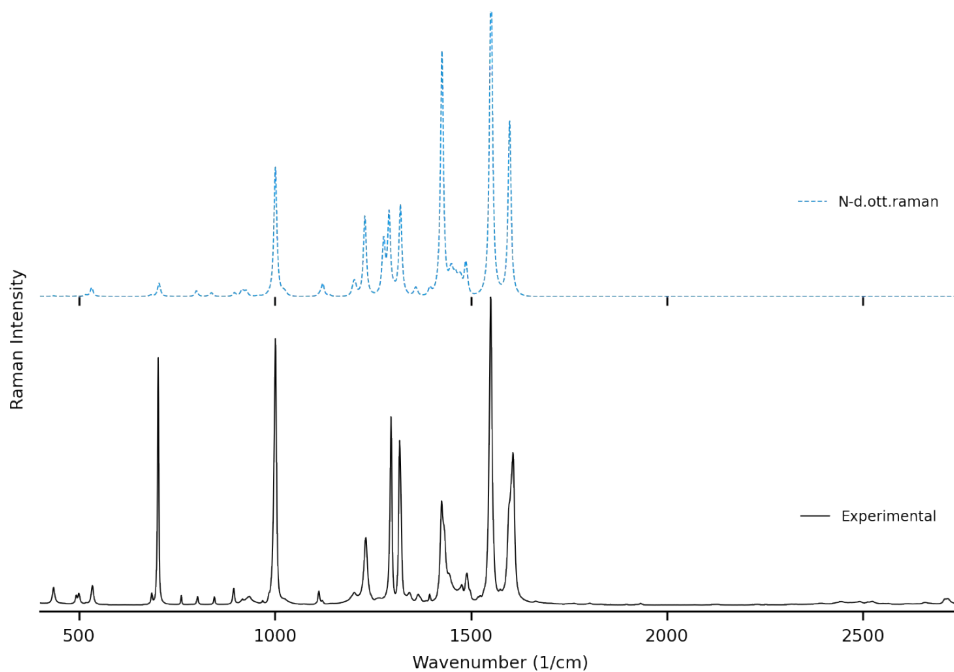

Molecule 2: 8-Hydroxyquinoline

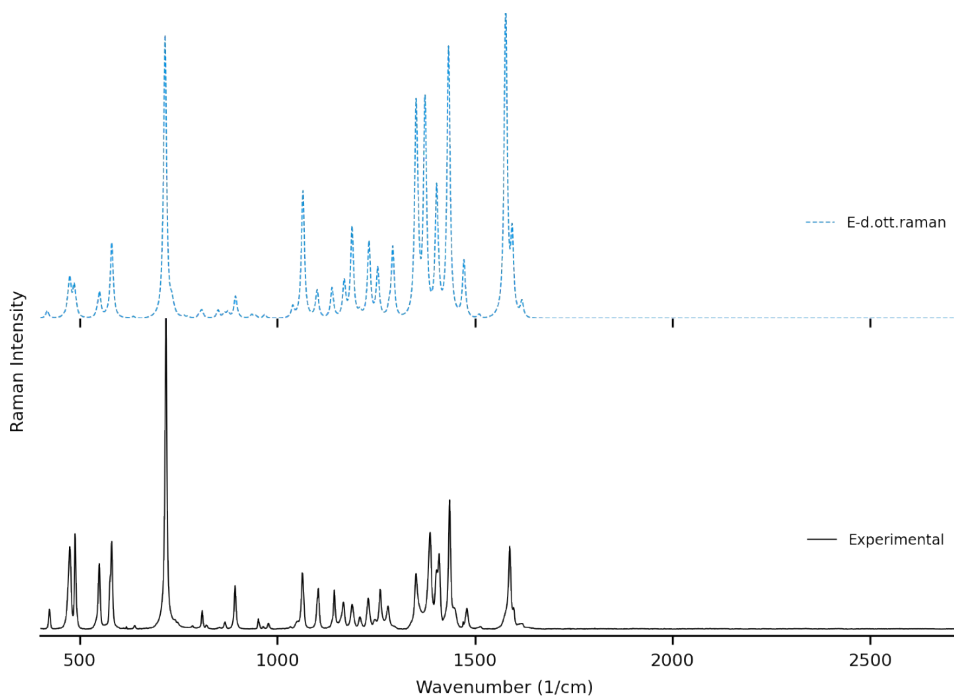



Molecule 3: Norcamphor

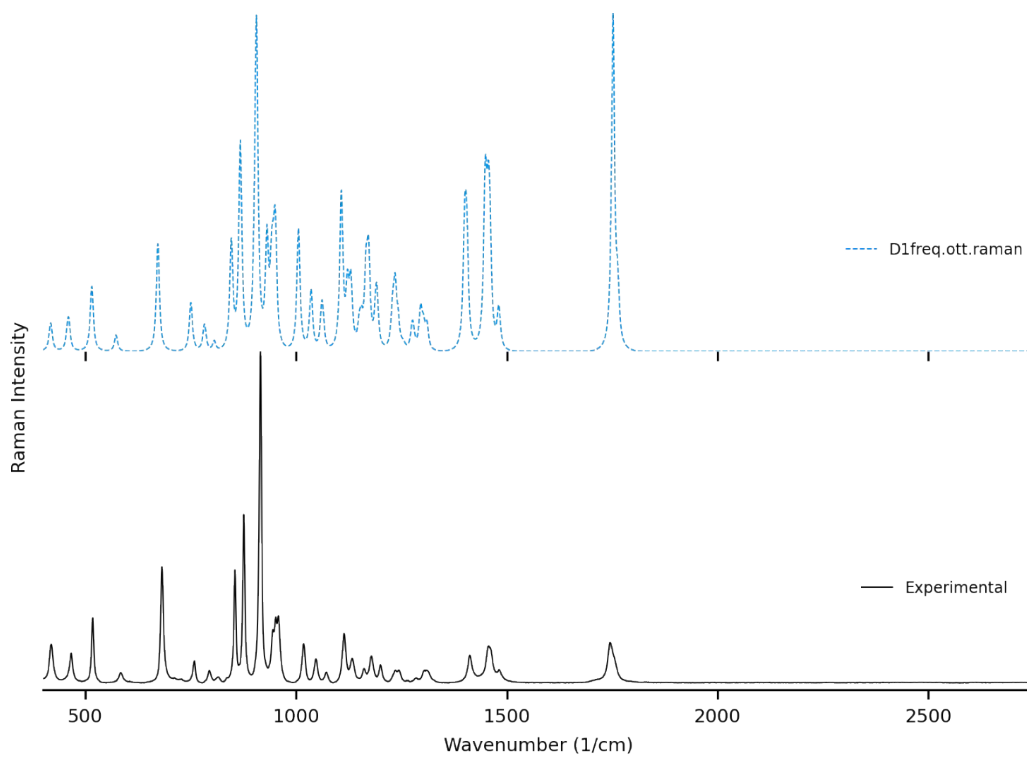

Molecule 4: Methylparaben

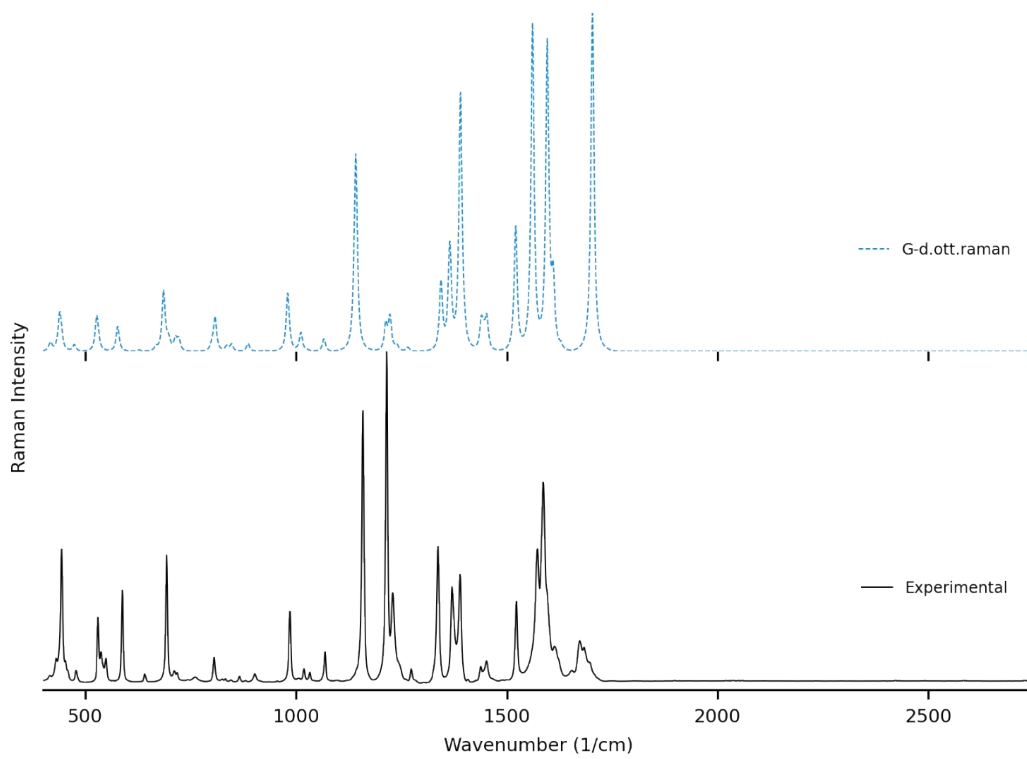

Molecule 5: BHT

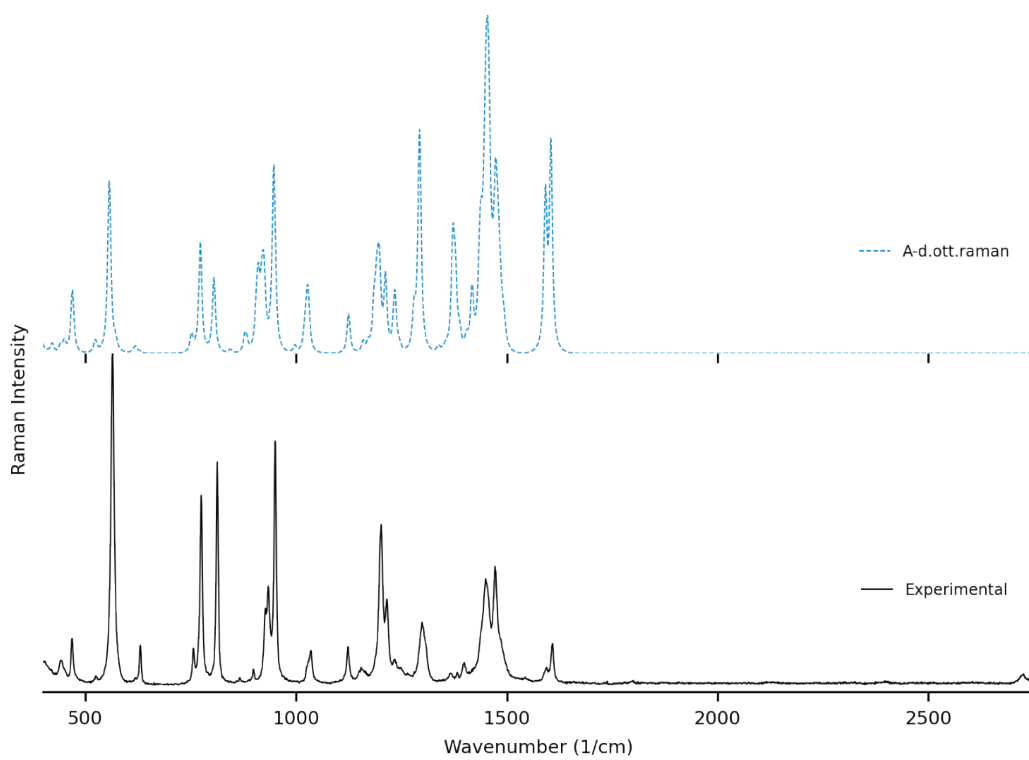

Molecule 6: Gramine

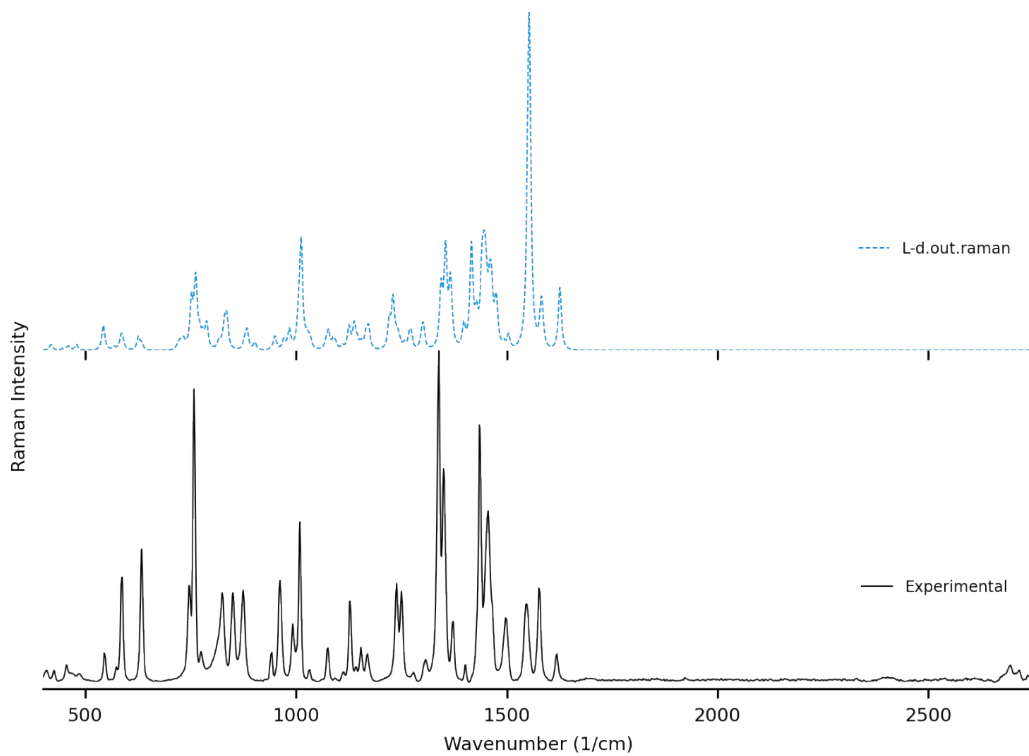

Molecule 7: Hymecromone

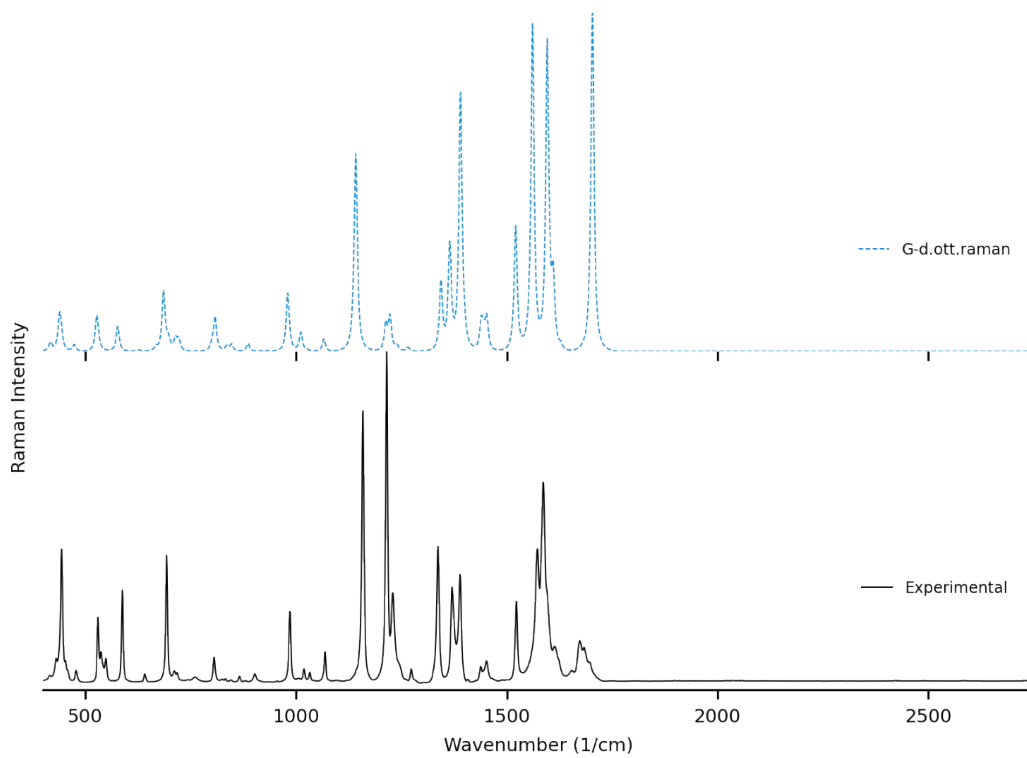

Molecule 8: Nicotinic acid

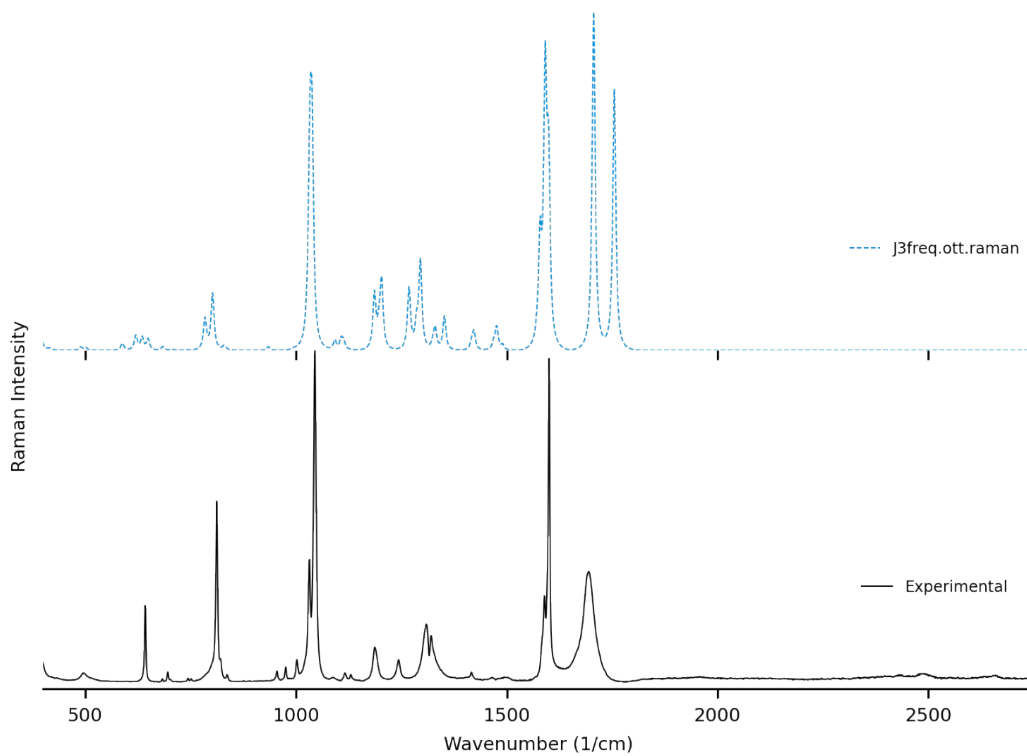

Molecule 9: Xanthinol

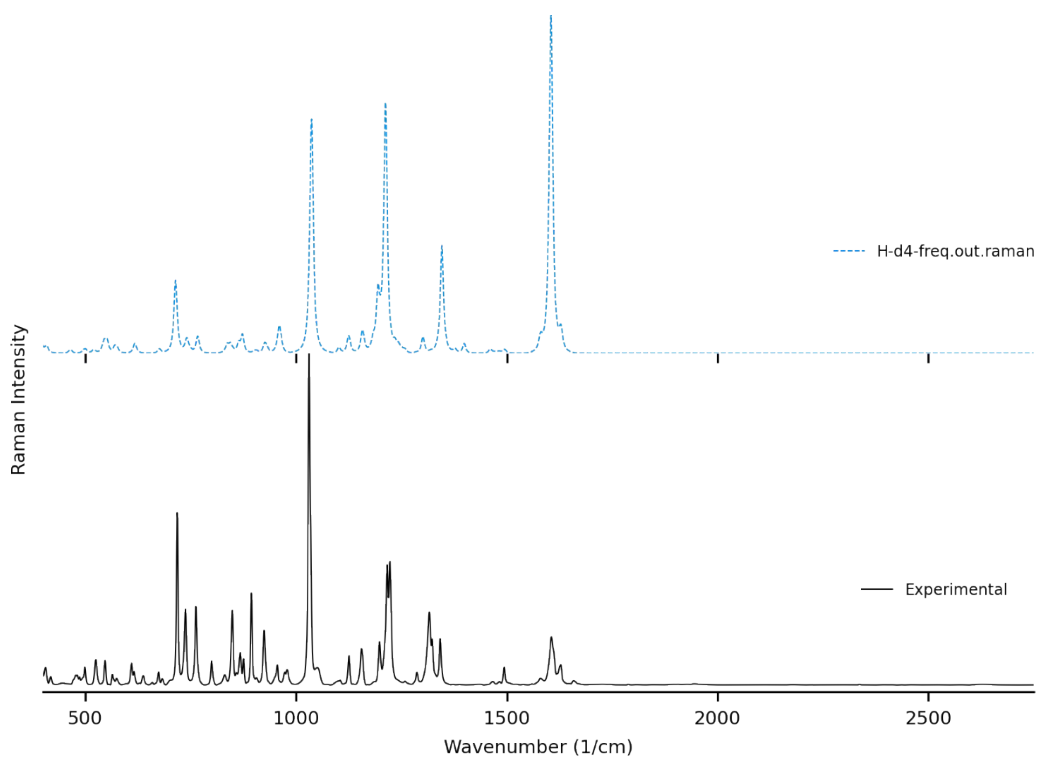

Molecule 10: Phenacetin

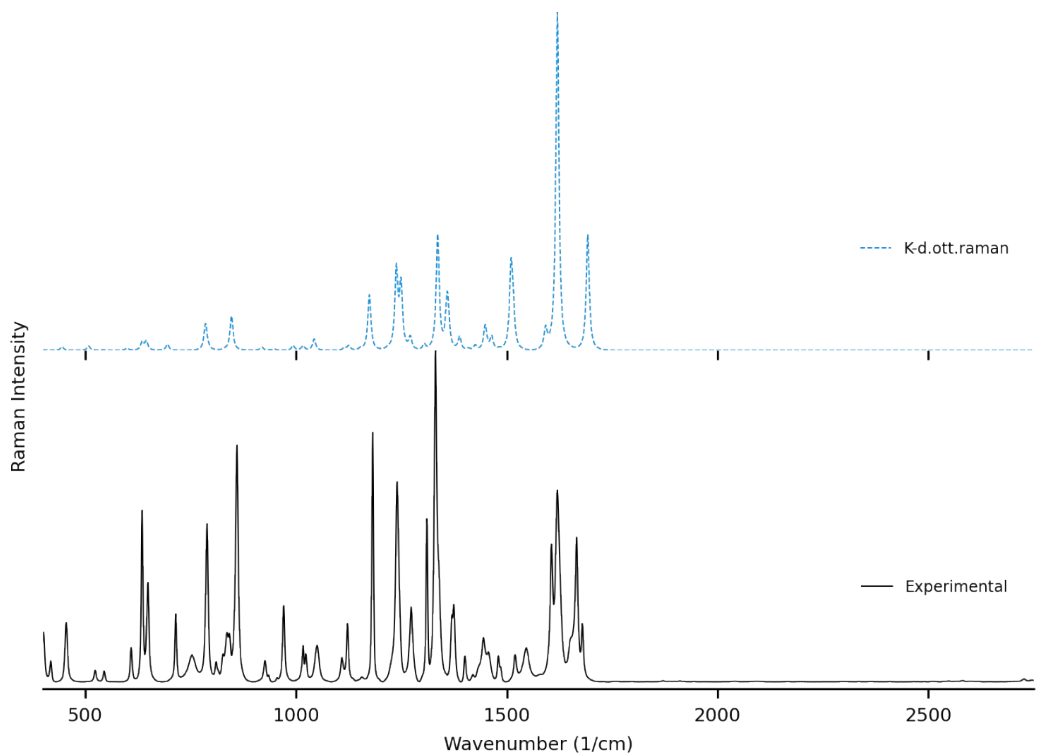

Molecule 11: Coumarin

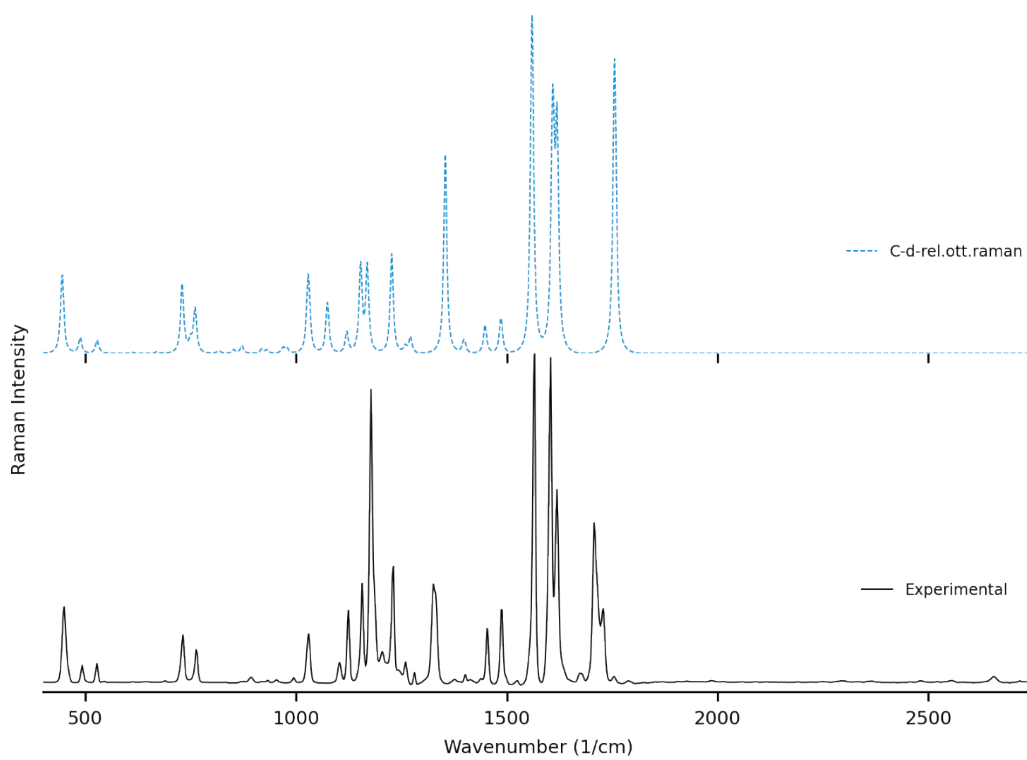

Molecule 12: Pyrioxidine

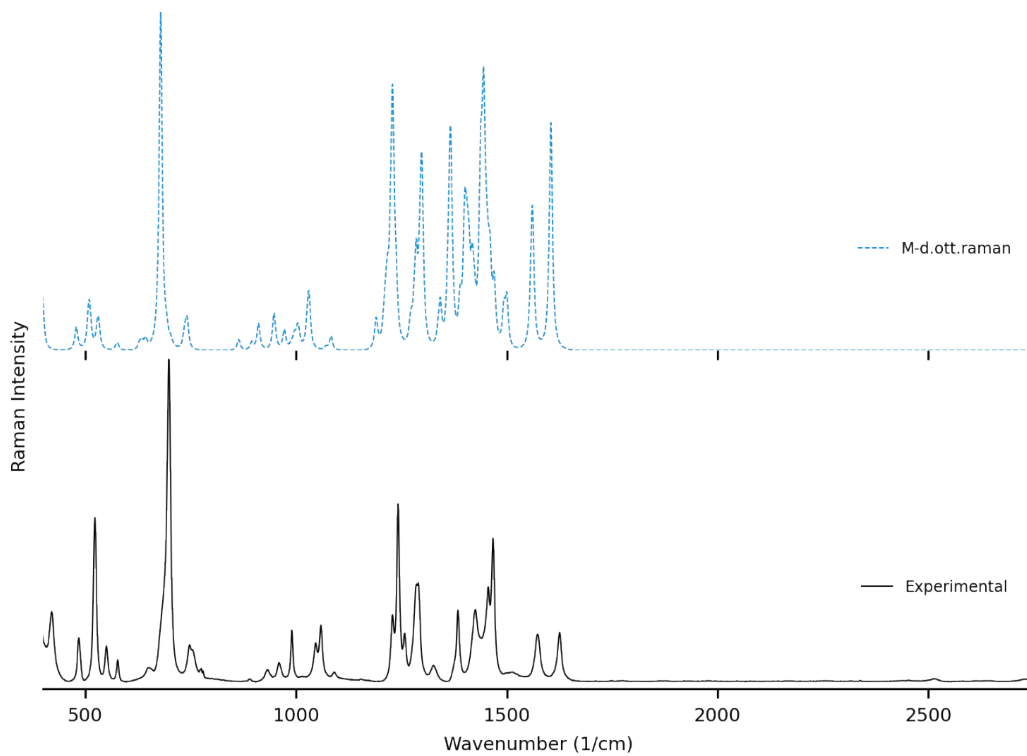

Molecule **14**: (+)-Borneol

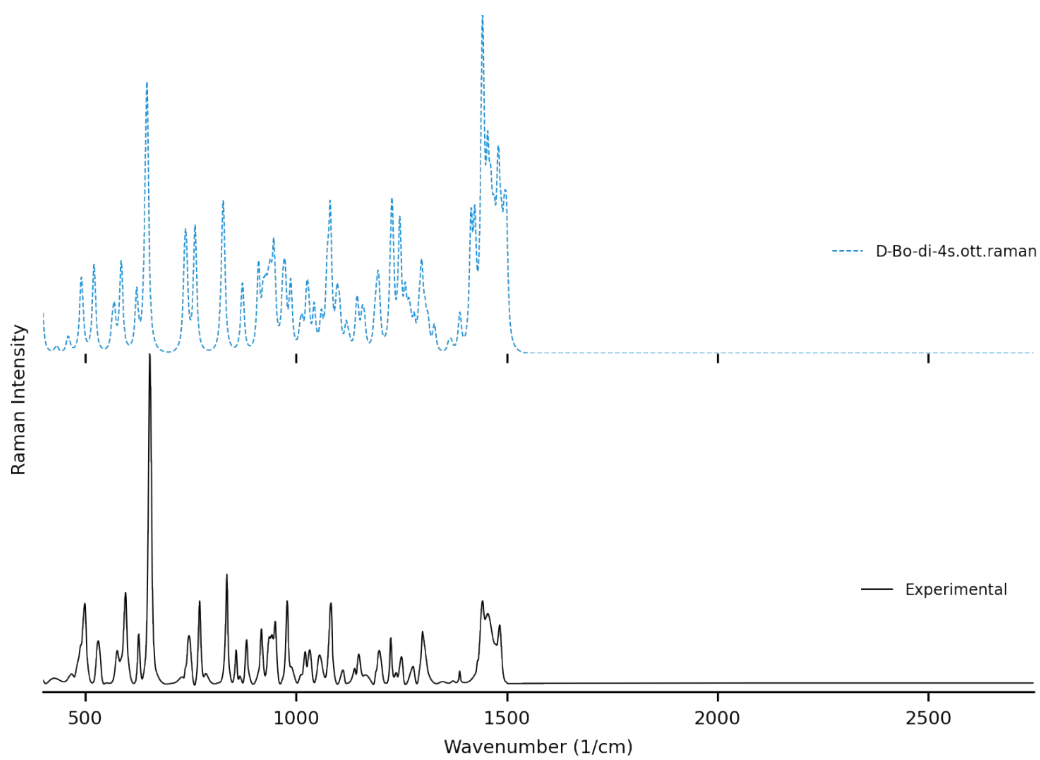

Molecule **15**: (+)-Isoborneol

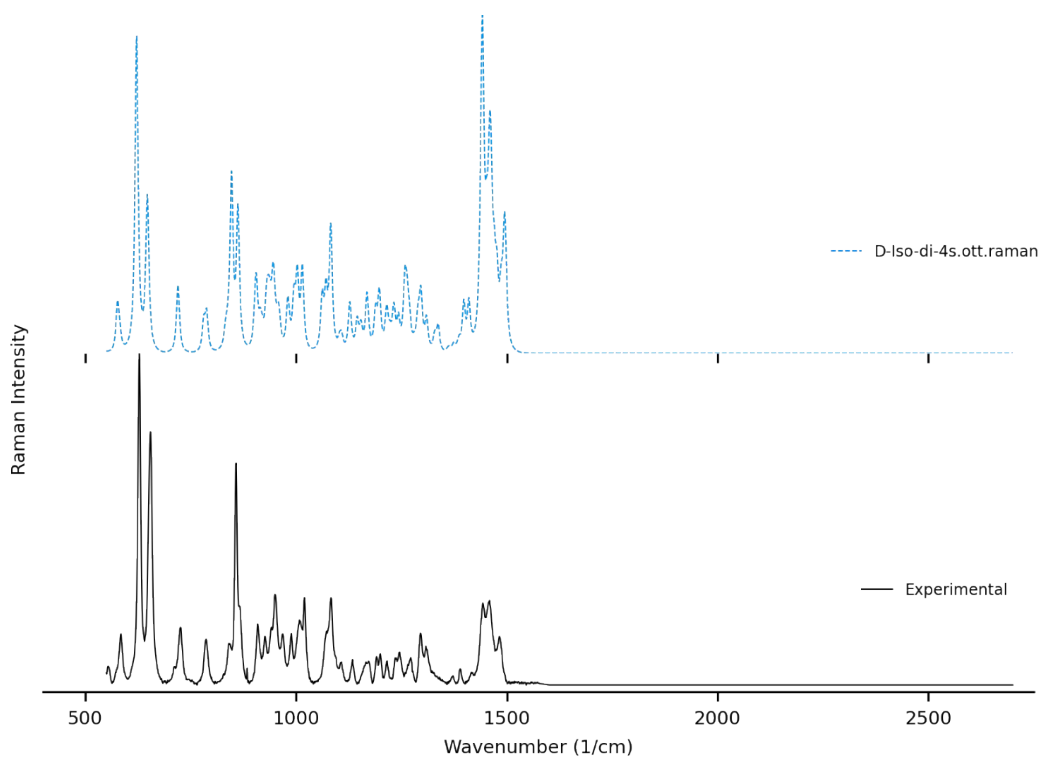

Molecule 16

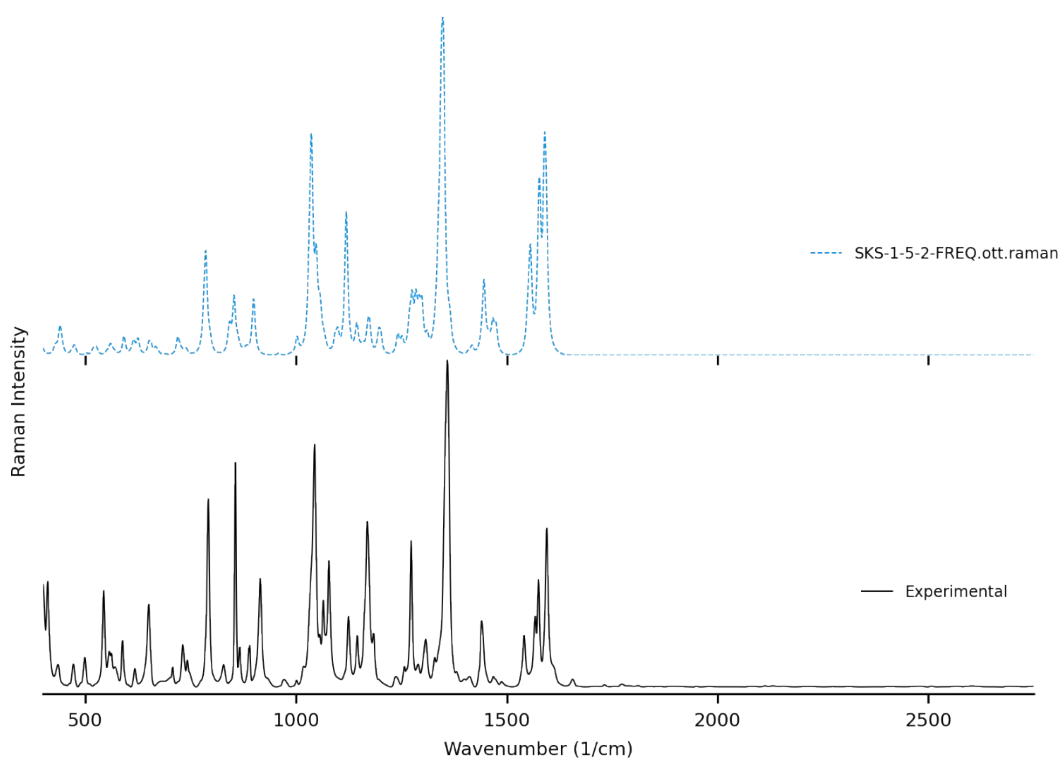

Molecule 17

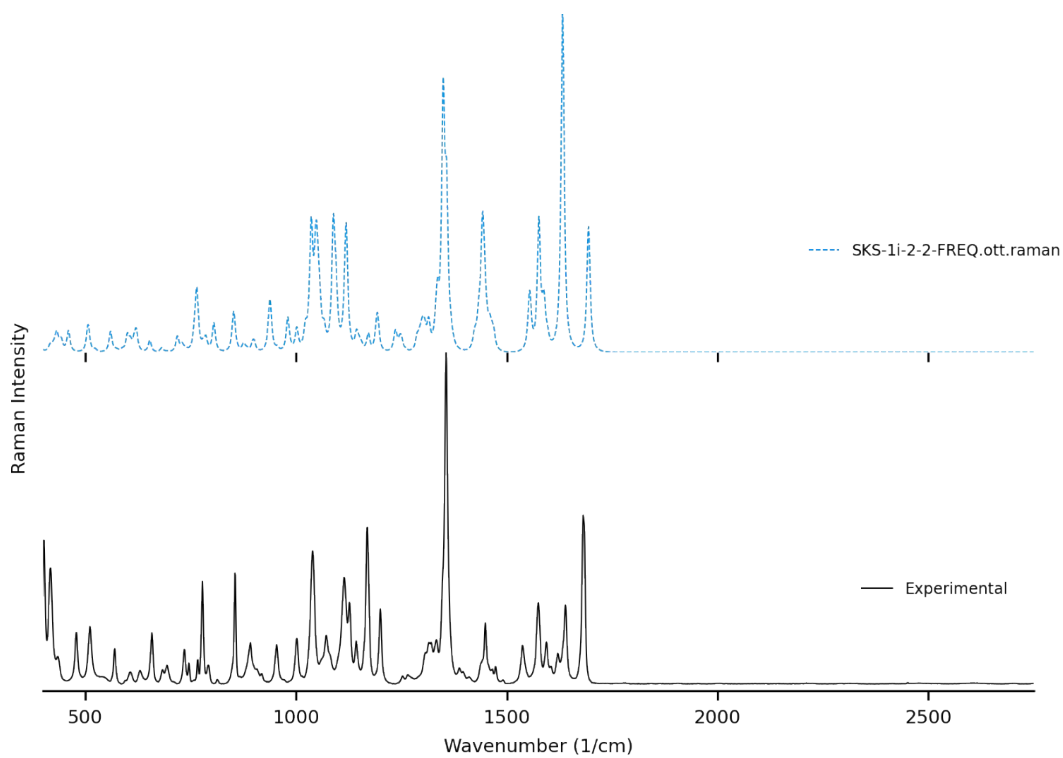

Molecule 18

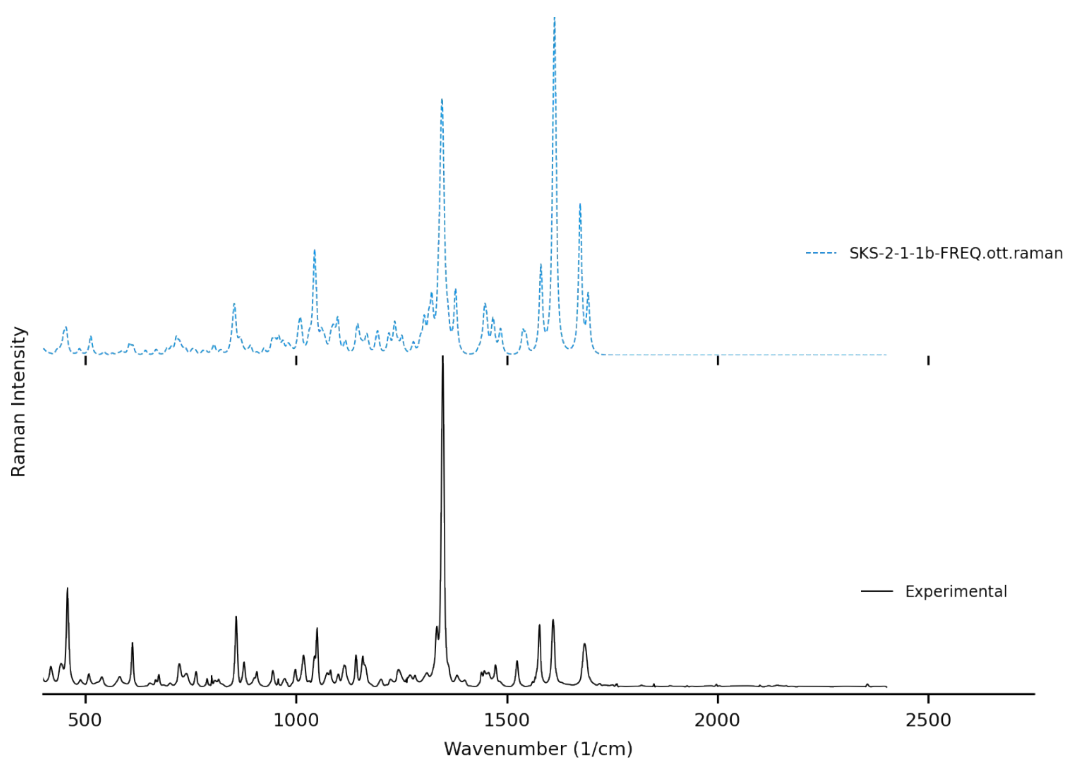

Molecule 19

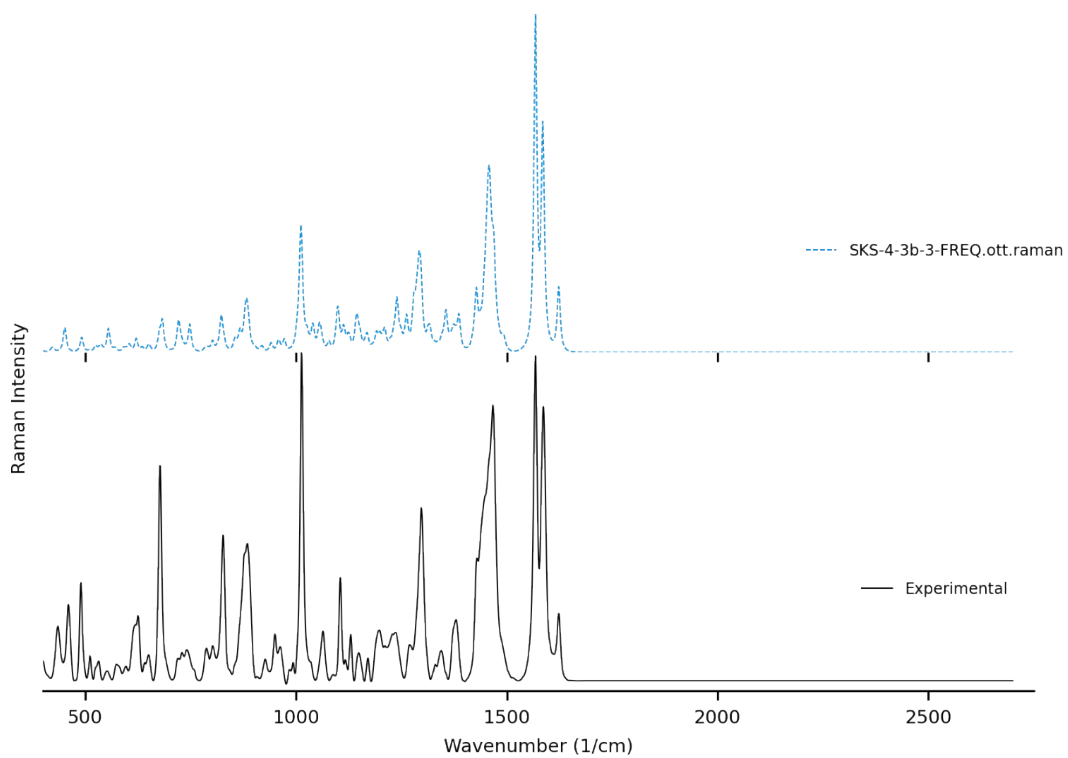



Molecule 20

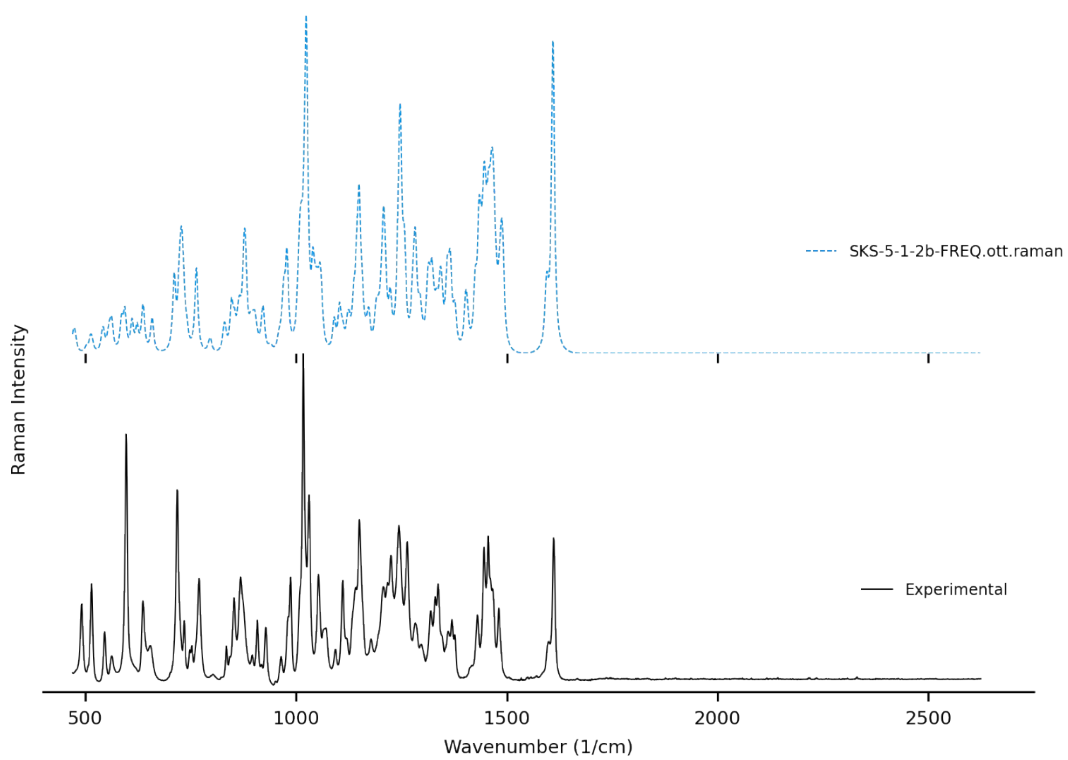

Molecule 21

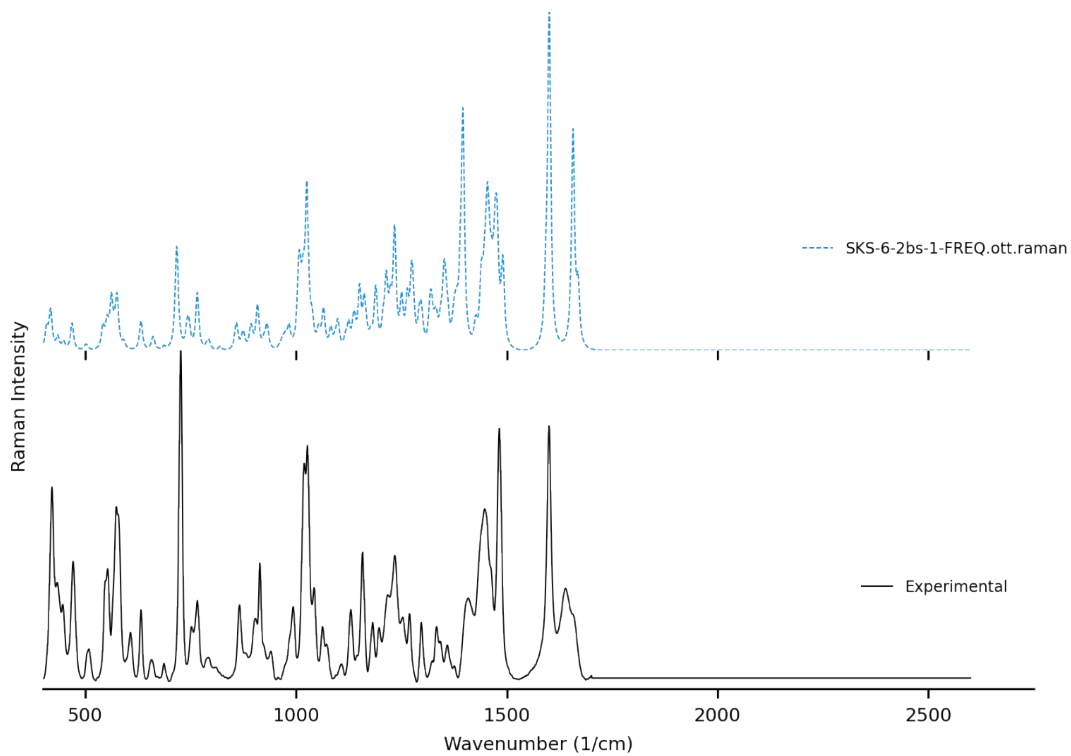

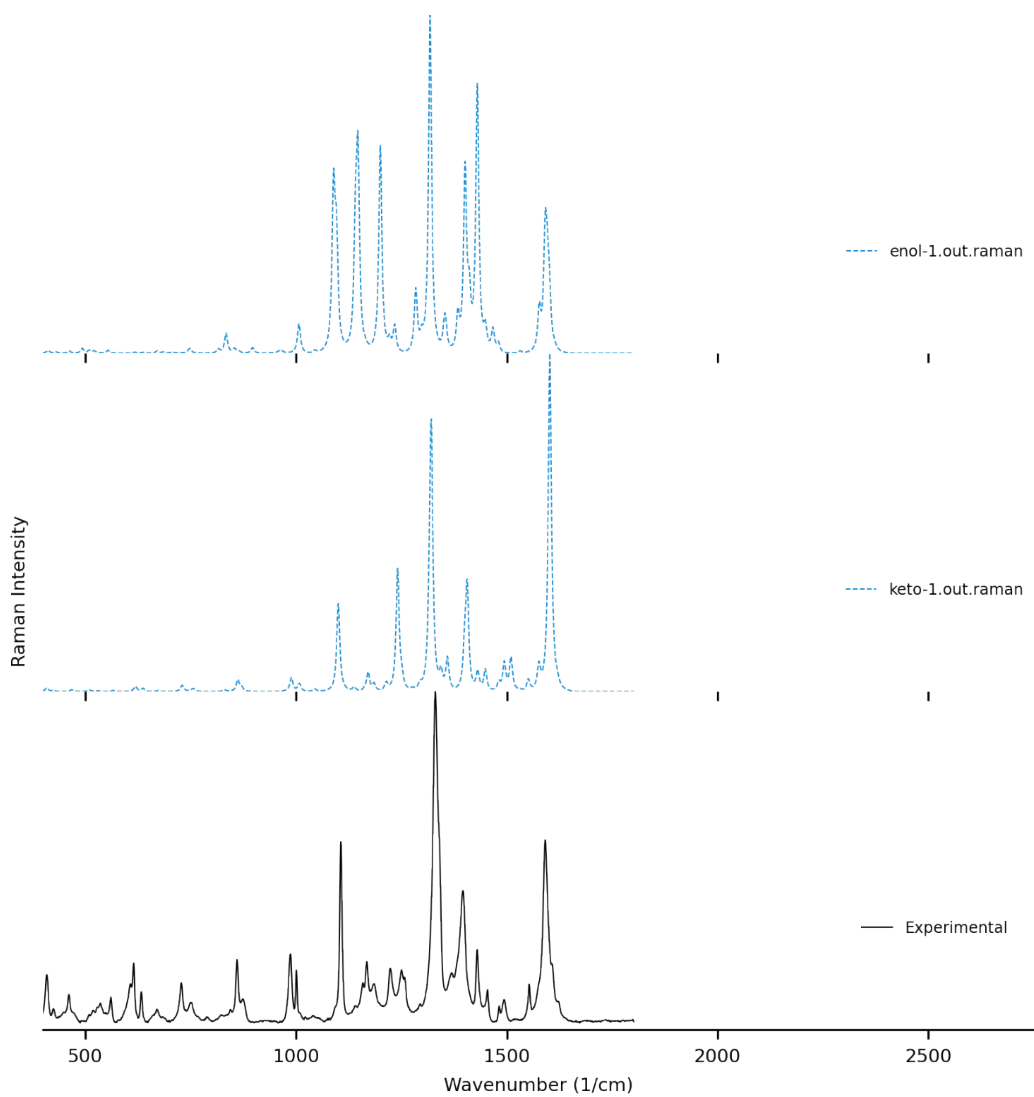

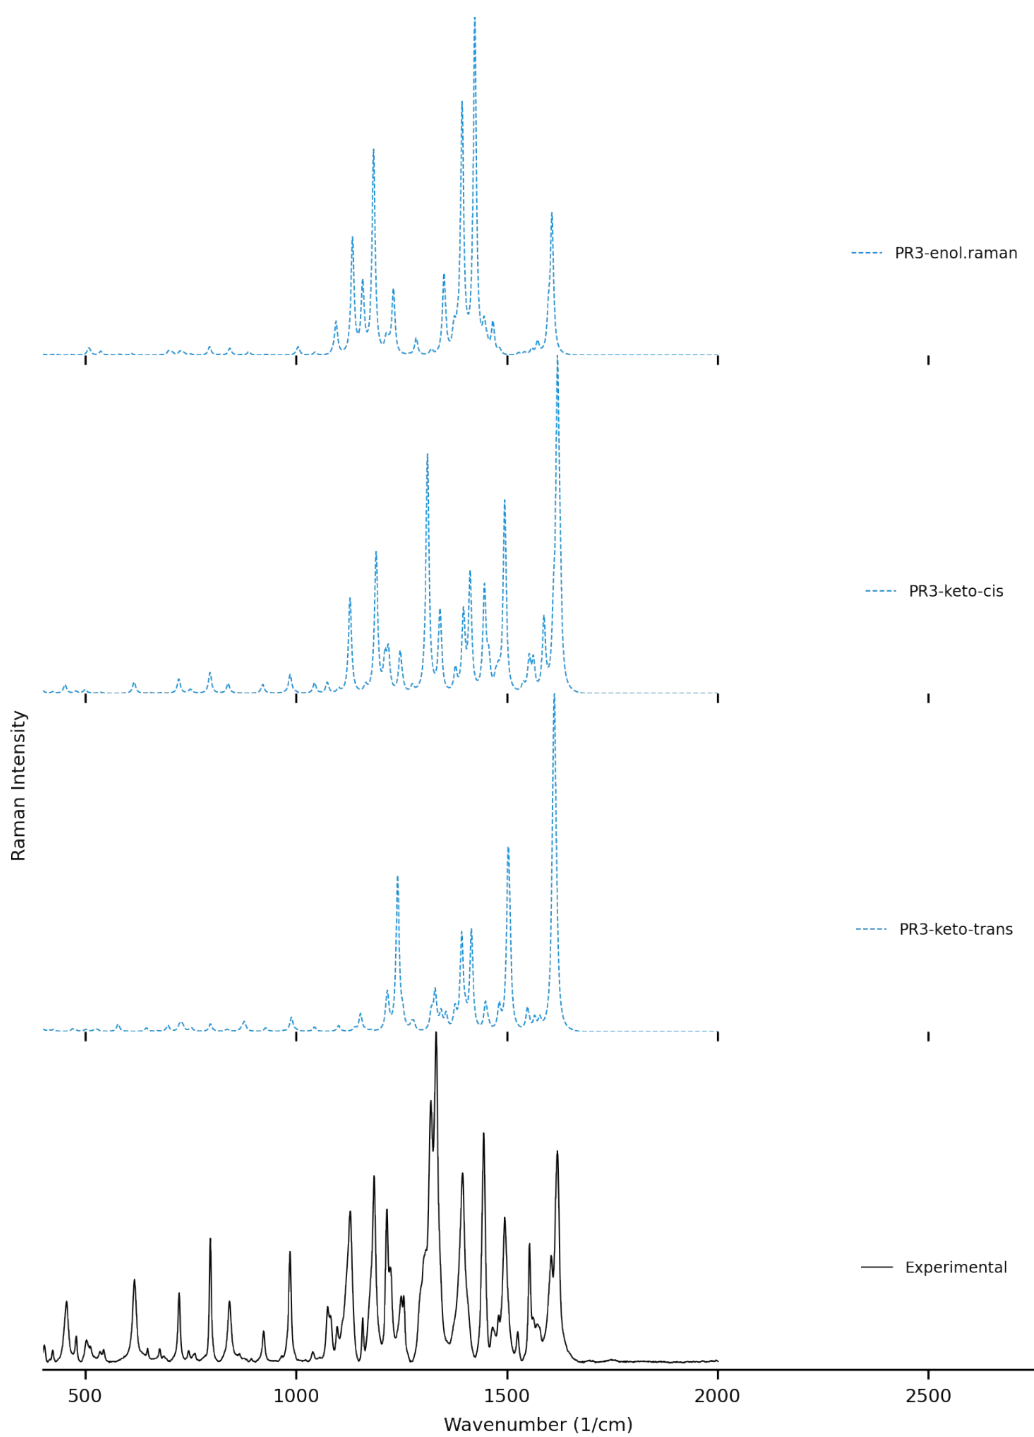

## 5. Materials

The instrument used was a Renishaw inVia microscope (United Kingdom). The following table details the origin of the samples.

**Table S1.** Suppliers of analyzed powders

| Molecule number | Name                            | Supplier                         |
|-----------------|---------------------------------|----------------------------------|
| <b>1</b>        | 4,4'-di-t-butyl-2,2'-bipyridine | Sigma                            |
| <b>2</b>        | 8-Hydroxyquinoline              | EMD (MERCK)                      |
| <b>3</b>        | Norcamphor                      | Aldrich                          |
| <b>4</b>        | Methylparaben                   | Fisher                           |
| <b>5</b>        | BHT                             | Aldrich                          |
| <b>6</b>        | Gramine                         | Aldrich                          |
| <b>7</b>        | Hymecromone                     | Sigma-Aldrich                    |
| <b>8</b>        | Nicotinic acid                  | J.T. Baker                       |
| <b>9</b>        | Xanthidrol                      | Anachemia                        |
| <b>10</b>       | Phenacetin                      | Anachemia                        |
| <b>11</b>       | Coumarin                        | Eastman                          |
| <b>12</b>       | Pyrixodine                      | Sigma                            |
| <b>13</b>       | (+)-Camphor                     | Aldrich                          |
| <b>14</b>       | (+)-Borneol                     | Synthesis                        |
| <b>15</b>       | (+)-Isoborneol                  | Synthesis                        |
| <b>16</b>       | 16                              | Published Synthesis <sup>1</sup> |
| <b>17</b>       | 17                              | Published Synthesis <sup>1</sup> |
| <b>18</b>       | 18                              | Published Synthesis <sup>1</sup> |
| <b>19</b>       | 19                              | Published Synthesis <sup>1</sup> |
| <b>20</b>       | 20                              | Published Synthesis <sup>1</sup> |
| <b>21</b>       | 21                              | Published Synthesis <sup>1</sup> |
| <b>PR1</b>      | PR1                             | Database <sup>2</sup>            |
| <b>PR3</b>      | PR3                             | Database <sup>2</sup>            |

## 6. Synthesis of Borneol/Isoborneol

To a solution of (+)-Camphor (9.9mg, 0.065mmol) in MeOH (0.5mL) at room temperature is added NaBH<sub>4</sub> (1éq, 2.5mg). The resulting mixture was stirred for 1hour (monitored by TLC). After completion, 1mL of saturated aqueous solution of NH<sub>4</sub>Cl was added followed by a dimethyl ether extraction (3x5mL). The organic layers were combined and washed with Brine and dried. Solvent removal in vacuo and column chromatography (8 : 2 Hexane : AcOEt) of the residue afforded the respective alcohols.

Isoborneol/borneol : white solid; m.p. 195,8°C; <sup>1</sup>H NMR (300 MHz, CDCl<sub>3</sub>): d=0.81 and 0.84 (2 s, 3H), 0.86 (s, 3H), 0.92 (s, 3H), 1.27–1.38 (m, 3H), 1.62–1.78 (m, 2H), 1.86 (s, 1H), 2.03–2.08 (m, 1H), 2.27–2.36 (m, 1H), 3.43–3.61 (isoborneol) and 3.95–3.97 ppm (borneol) (two m, 1H); <sup>13</sup>C NMR (75 MHz, CDCl<sub>3</sub>): d=11.3, 13.3, 18.6, 20.0, 20.4, 25.8, 27.2, 28.2, 29.6, 33.8, 38.9, 40.3, 45.0, 46.3, 48.9, 49.4, 77.3, 79.8 ppm.

## 7. Measurement parameters

All the solid powders were placed on a quartz surface and measured using the 50X objective of a Renishaw inVia confocal Raman microscope. Bi-weekly calibration of the wavenumber axis using an internal sample of crystalline silicon ensures proper positioning of the Raman peaks. The 532 nm laser has a maximum power of 50 mW, and the 785 nm laser, of 300 mW.

**Table S2.** Instrumental parameters for the measurement of Raman spectra

| Molecule number | Name                            | Laser wavelength | Laser intensity | Nb scans | Scan time |
|-----------------|---------------------------------|------------------|-----------------|----------|-----------|
| 1               | 4,4'-di-t-butyl-2,2'-bipyridine | 532 nm           | 1%              | 7x       | 6 m       |
| 2               | 8-Hydroxyquinoline              | 785 nm           | 0.50%           | 4x       | 2 m       |
| 3               | Norcamphor                      | 785 nm           | 0.50%           | 2x       | 2 m       |
| 4               | Methylparaben                   | 785 nm           | 0.50%           | 3x       | 100 s     |
| 5               | BHT                             | 532 nm           | 1%              | 5x       | 2 m       |
| 6               | Gramine                         | 532 nm           | 5%              | 6x       | 100 s     |
| 7               | Hymecromone                     | 785 nm           | 0.10%           | 5x       | 1600 s    |
| 8               | Nicotinic acid                  | 532 nm           | 5%              | 3x       | 16 s      |
| 9               | Xanthidrol                      | 785 nm           | 1%              | 3x       | 100 s     |
| 10              | Phenacetin                      | 785 nm           | 1%              | 2x       | 3 m       |
| 11              | Coumarin                        | 532 nm           | 10%             | 10x      | 25 s      |
| 12              | Pyrixodine                      | 785 nm           | 5%              | 4x       | 100 s     |
| 13              | (+)-Camphor                     | 785 nm           | 1%              | 3x       | 100 s     |
| 14              | (+)-Borneol                     | 785 nm           | 1%              | 2x       | 100 s     |
| 15              | (+)-Isoborneol                  | 785 nm           | 1%              | 2x       | 100 s     |
| 16              | 16                              | 785 nm           | 1%              | 3x       | 60 s      |
| 17              | 17                              | 785 nm           | 1%              | 8x       | 100 s     |
| 18              | 18                              | 785 nm           | 0.05%           | 20x      | 800 s     |
| 19              | 19                              | 785 nm           | 5.00%           | 14x      | 2m        |
| 20              | 20                              | 785 nm           | 0.50%           | 5x       | 10 m      |
| 21              | 21                              | 785 nm           | 5%              | 35x      | 100 s     |

## 8. SARA Compression function

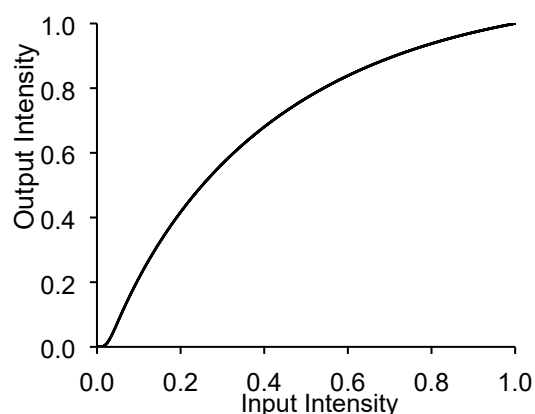

**Figure S4.** Intensity compression curve used by SARA in the course of its spectral pre-processing.

$$y = 1 - 1.16 (5x + 1.1)^{-0.7(x+1)} + 0.11(46^{-350x^2 - 9.8x - 0.0686})$$

The compression <sup>(S1)</sup> function is implemented in SARA by generating 2000 equally-spaced points along equation (S1) and normalizing each axis with the widely known min-max normalization to ensure that the mapping points are correctly set up from 0 to 1, meaning all spectra have a similar intensity range.

The resulting points shown in **Figure S4** are used by interpolating the spectral input intensity to the corresponding output intensity. The high resolution of the compression curve (2000 points) ensures that no noise is introduced during interpolation.

## 9. SARA Voigt profile adjustment and DFT functional anharmonic correction

### 9.1. Voigt Profile adjustment for peak width

Not all DFT software packages which calculate Raman peaks apply peak broadening to generate human-readable spectra. For instance, Gaussian is known to do so, and ORCA has a command line which can generate gaussian-shaped peaks. The SARA software is made with this in mind and will apply an empirically optimized Voigt function to each “datapoint coordinate”-type peak that the ORCA DFT package outputs. The carefully adjusted Voigt profile should generate Raman spectra with strong similarity to those obtained experimentally in most cases. However, in the event that the Raman instrument used produces spectra of drastically different peak width to what the theoretical spectra look like, a variable in the software can be changed to affect the peak width of theoretical spectra.

On line 107 of SARA.py:

```
def gen_from_peaks(data, half_width: int = 60):
```

The numerical value – established at 60 by default - can be changed to a value between 50 and 70. Empirical trial will be necessary to ensure close resemblance between the new peak width and what the chemist sees on their experiment spectra.

### 9.2. DFT functional anharmonic correction factor of the wavenumbers

Harmonic calculations of molecular frequencies with DFT functionals typically require an anharmonic correction. The amplitude of the scaling factor will change according to the level of theory employed. For this article, r<sup>2</sup>SCAN-3c had no strongly established correction factor, and 0.98 was used to good effect.

For the chemists who wish to try future levels of theory, the SARA program provides a simple way to change this correction factor.

On line 648 of SARA.py:

```
corrFactor = 0.98 # Anharmonic correction factor, applied on all theoretical frequencies
```

This numerical value can be changed to the appropriate anharmonic correction factor.

## 10. References

1. Signo K., Canesi S., *Org. Lett.* **2022**, 24, 27, 4939–4942.
2. Fremout, W.; Saverwyns, S., *Journal of Raman spectroscopy*, **2012**, 43.11, 1536-1544.
